1 **A complete electron microscopy volume of the brain of adult *Drosophila***  
2 ***melanogaster***

3 Zhihao Zheng<sup>1,‡</sup>, J. Scott Lauritzen<sup>1,‡</sup>, Eric Perlman<sup>1,6</sup>, Camenzind G. Robinson<sup>1</sup>, Matthew  
4 Nichols<sup>1</sup>, Daniel Milkie<sup>2,7</sup>, Omar Torrens<sup>2</sup>, John Price<sup>3</sup>, Corey B. Fisher<sup>1</sup>, Nadiya Sharifi<sup>1</sup>, Steven  
5 A. Calle-Schuler<sup>1</sup>, Lucia Kmecova<sup>1</sup>, Iqbal J. Ali<sup>1</sup>, Bill Karsh<sup>1</sup>, Eric T. Trautman<sup>1</sup>, John Bogovic<sup>1</sup>,  
6 Philipp Hanslovsky<sup>1</sup>, Gregory S. X. E. Jefferis<sup>4</sup>, Michael Kazhdan<sup>5</sup>, Khaled Khairy<sup>1</sup>, Stephan  
7 Saalfeld<sup>1</sup>, Richard D. Fetter<sup>1,8</sup>, Davi D. Bock<sup>1\*</sup>

8 1. Janelia Research Campus, Howard Hughes Medical Institute, Ashburn, VA 20147

9 2. Coleman Technologies, Inc., Newtown Square, PA 19073

10 3. Hudson Price Designs, LLC, Hingham, MA 02043

11 4. Division of Neurobiology, MRC Laboratory of Molecular Biology, Cambridge, CB2 0QH, UK

12 5. Department of Computer Science, Johns Hopkins University, Baltimore, MD 21218

13 6. Present address: Center for Imaging Science, Johns Hopkins University, Baltimore, MD  
14 21218

15 7. Present address: Janelia Research Campus, Howard Hughes Medical Institute, Ashburn, VA  
16 20147

17 8. Present address: Department of Biochemistry & Biophysics, University of California, San  
18 Francisco 94158

19 \* [bockd@janelia.hhmi.org](mailto:bockd@janelia.hhmi.org)

20 ‡These authors contributed equally to this work.

21 **SUMMARY** (150 words)

22 *Drosophila melanogaster* has a rich repertoire of innate and learned behaviors. Its 100,000–  
23 neuron brain is a large but tractable target for comprehensive neural circuit mapping. Only  
24 electron microscopy (EM) enables complete, unbiased mapping of synaptic connectivity;  
25 however, the fly brain is too large for conventional EM. We developed a custom high-throughput  
26 EM platform and imaged the entire brain of an adult female fly. We validated the dataset by  
27 tracing brain-spanning circuitry involving the mushroom body (MB), intensively studied for its  
28 role in learning. Here we describe the complete set of olfactory inputs to the MB; find a new cell  
29 type providing driving input to Kenyon cells (the intrinsic MB neurons); identify neurons  
30 postsynaptic to Kenyon cell dendrites; and find that axonal arbors providing input to the MB  
31 calyx are more tightly clustered than previously indicated by light-level data. This freely available  
32 EM dataset will significantly accelerate *Drosophila* neuroscience.

33

34 **KEYWORDS**

35 Electron microscopy, connectomics, neural circuits, *Drosophila melanogaster*, mushroom body,  
36 olfaction, image stitching

37

38 **HIGHLIGHTS**

- 39 - A complete adult fruit fly brain was imaged, using electron microscopy (EM)  
40 - The EM volume enables brain-spanning mapping of neuronal circuits at the synaptic level  
41 - Olfactory projection neurons cluster more tightly in mushroom body calyx than expected from  
42 light-level data

- 43 - The primary postsynaptic targets of Kenyon cells (KCs) in the MB are other KCs, as well as the  
44 anterior paired lateral (APL) neuron
- 45 - A newly discovered cell type, MB-CP2, integrates input from several sensory modalities and  
46 provides microglomerular input to KCs in MB calyx
- 47 - A software pipeline was created in which EM-traced skeletons can be searched for within  
48 existing large-scale light microscopy (LM) databases of neuronal morphology, facilitating cell  
49 type identification and discovery of relevant genetic driver lines

## 50 INTRODUCTION

51 Neural circuits are in large part made of neurons and the synapses connecting them. Maps of  
52 connectivity inform and constrain all models of how neuronal circuits transform information and  
53 subserve behavior (Braitenberg and Schüz, 1998; Marr, 1969; Sterling and Laughlin, 2015).  
54 Historically, anatomical maps of neuronal connectivity were inferred from light microscopy (LM)  
55 images of sparsely labeled neurons (Shepherd, 2016). Updated forms of this approach remain  
56 important to this day (e.g. Wertz et al., 2015; Wolff et al., 2015), as do electrophysiological  
57 measurements of connectivity between small groups of neurons (Ko et al., 2011; Perin et al.,  
58 2011; Song et al., 2005). However, for a given volume of brain tissue, these methods lack the  
59 resolution to map all synapses between all neurons, which may result in an undersampled  
60 description of neuronal network topology (Helmstaedter et al., 2008).

61 Electron microscopy (EM) is the only method capable of simultaneously resolving all neuronal  
62 processes and synapses in a given volume of brain tissue – a requirement if one wishes to  
63 make complete maps of neuronal connectivity at the synapse level (or 'connectomes'; Lichtman  
64 and Sanes, 2008). However, generating EM volumes of any appreciable size is technically  
65 challenging (Briggman and Bock, 2012; Harris et al., 2006; Helmstaedter, 2013). Nanometer-  
66 scale image voxels must be acquired over a spatial extent sufficient to encapsulate circuits of  
67 interest, typically tens to hundreds of microns at a minimum. Volume EM for connectomics has  
68 therefore traditionally been limited to exceedingly small organisms, such as the nematode  
69 (White et al., 1986) and the larval ascidian (Ryan et al., 2016), or to small subvolumes from (for  
70 example) the fly optic medulla (Takemura et al., 2008), cat thalamus (Hamos et al., 1987), and  
71 macaque visual cortex (McGuire et al., 1991).

72 Recent technical advances have enabled increased acquisition speed and automation of the  
73 imaging pipeline, producing larger EM volumes than were previously attainable (reviewed in

74 Briggman and Bock, 2012; see also Eberle et al., 2015; Kuwajima et al., 2013; Xu et al., 2017).  
75 Circuit diagrams mapped in these larger EM volumes have yielded new insights into (for  
76 example) the network architecture of the larval fly (Ohyama et al., 2015), the optic medulla of  
77 the adult fly (Takemura et al., 2017b), the zebrafish olfactory bulb (Wanner et al., 2016), and the  
78 mammalian retina (Briggman et al., 2011; Lauritzen et al., 2016), thalamus (Morgan et al.,  
79 2016), and neocortex (Bock et al., 2011; Kasthuri et al., 2015; Lee et al., 2016). Large EM  
80 volumes have also revealed surprising new findings in cellular neuroanatomy, such as the  
81 differential distribution of myelin on axons depending on neuronal subtype (Micheva et al., 2016;  
82 Tomassy et al., 2014). However, imaging infrastructure for volume EM continues to limit the  
83 scale of connectomics investigations.

84 Here we report next-generation hardware and software for high throughput acquisition and  
85 processing of EM data sets. We apply this infrastructure to image the entire brain of a female  
86 adult fruit (aka vinegar) fly, *Drosophila melanogaster* (Figure 1A). At approximately  $8 \times 10^7 \mu\text{m}^3$ ,  
87 this volume is nearly two orders of magnitude larger than the next-largest complete brain  
88 imaged at sufficient resolution to trace synaptic connectivity, that of the first instar *Drosophila*  
89 larva (Ohyama et al., 2015).

90 *D. melanogaster* is an important model organism for neurobiology research, owing to its rich  
91 repertoire of innate and learned behavior (Hampel et al., 2015; Heisenberg and Wolf, 1984;  
92 Hoopfer, 2016; Kim et al., 2017; Ofstad et al., 2011; Oswald and Waddell, 2015; Pavlou and  
93 Goodwin, 2013; von Reyn et al., 2014), electrophysiological accessibility (e.g. Hige et al., 2015;  
94 Wilson et al., 2004), relatively small size (Figure 1A), and the stereotypy of and genetic access  
95 to most of the ~100,000 neurons in its brain (Aso et al., 2014; Chiang et al., 2011; Jenett et al.,  
96 2012; Kvon et al., 2014; Milyaev et al., 2012; Pfeiffer et al., 2010). In the fly brain, each  
97 morphological cell type usually consists of one to a few neurons per hemisphere, with

98 stereotyped neuronal arbors reproducible across individuals with a precision of ~10 microns  
99 (Costa et al., 2016; Jefferis et al., 2007; Lin et al., 2007). Thousands of genetic driver lines for  
100 specific subsets of cell types (Jenett et al., 2012; Kvon et al., 2014), or even single cell types  
101 (Aso et al., 2014; Grabe et al., 2015; Wolff et al., 2015), enable *in vivo* manipulation of neuronal  
102 physiology and the construction of searchable databases of neuronal morphology (Chiang et al.,  
103 2011; Costa et al., 2016; Milyaev et al., 2012).

104 We leveraged the stereotypy of fly neuronal morphology to validate that the EM volume was  
105 suitable for tracing brain-spanning neuronal circuitry. We focused on the olfactory projection  
106 neurons (PNs), which are thoroughly described at the light microscopy (LM) level (Jefferis et al.,  
107 2007; Lin et al., 2007; Tanaka et al., 2004) (Figure 1B, Figure S1). On each side of the brain,  
108 the dendrites of ~150 PNs innervate ~50 glomeruli of the antennal lobe (AL). Each glomerulus is  
109 morphologically identifiable (Couto et al., 2005; Grabe et al., 2015; Stocker et al., 1990) and  
110 receives input from a stereotyped set of olfactory receptor neurons (ORNs), resulting in  
111 reproducible PN odorant tunings across animals (Wilson, 2013; Wilson et al., 2004). PN axons  
112 project from the AL to the lateral horn (LH), which is thought to subserve stereotyped behavioral  
113 responses to odorants (Heimbeck et al., 2001; Jefferis et al., 2007; Ruta et al., 2010). Along the  
114 way to the LH, most PNs send collaterals into the calyx of the mushroom body (MB), a locus of  
115 learning, recall, and synaptic plasticity (Davis, 2011; Heisenberg, 2003; Oswald and Waddell,  
116 2015). Most PN types project to the MB calyx via the medial antennal lobe tract (mALT), but  
117 several travel in secondary tracts, and a few bypass calyx entirely and project only to LH (Frank  
118 et al., 2015; Stocker et al., 1990; Tanaka et al., 2012).

119 To explore whether the EM volume could be used to make new discoveries as well as verify  
120 existing knowledge, we examined a subset of the circuitry downstream to PNs in the MB calyx.  
121 The *Drosophila* MB has ~2,000 intrinsic neurons on each side of the brain called Kenyon cells

122 (KCs). Each KC projects a highly variable dendritic arbor into the calyx, which terminates in  
123 elaborations known as claws (Figure S1). Claws from many KCs converge to wrap individual PN  
124 boutons in a characteristic structure called the microglomerulus (Yasuyama et al., 2002), and  
125 each KC receives input from multiple PNs of diverse types (Caron et al., 2013; Gruntman and  
126 Turner, 2013). KCs sample this input in what is thought to be a random fashion (Caron et al.,  
127 2013), although some biases have been noted (Gruntman and Turner, 2013). In order to fire  
128 action potentials, KCs require a threshold number of input PNs to be coactive (Gruntman and  
129 Turner, 2013); the firing pattern of KCs is therefore thought to be a combinatorial and sparse  
130 representation of olfactory stimuli. The dendrites of KCs also receive inhibitory and modulatory  
131 synapses from a variety of other cell types within the calyx, and have presynaptic release sites,  
132 which target unknown cell types (Butcher et al., 2012; Christiansen et al., 2011). KC axons  
133 project from the calyx to the MB lobes, where they synapse onto MB output neurons (MBONs).  
134 KC-MBON synapses are modulated by rewarding or punishing signals from dopaminergic  
135 afferent neurons (DANs; Aso et al., 2012; Burke et al., 2012; Liu et al., 2012); this plasticity  
136 underlies olfactory memory formation (Hige et al., 2015; Oswald et al., 2015; Sejourne et al.,  
137 2011).

138 In the current work, we surveyed all microglomeruli in the main MB calyx and traced their bouton  
139 inputs sufficiently to identify the originating cell's type, resulting in a description of the complete  
140 set of olfactory inputs to the MB. Although most MB input originated from olfactory PNs, we  
141 discovered a previously unknown cell type providing bouton input to KC claws. To map unknown  
142 connectivity within the calyx, we also identified the cell types of the KC postsynaptic targets.  
143 Finally, we found more clustering of PN axonal afferents within the MB calyx than was predicted  
144 from light microscopy (LM) data, which may bias the sampling of olfactory input from PNs by

145 KCs. These findings demonstrate the utility of this whole-brain dataset for mapping both known  
146 and new neural circuit connections.

147

## 148 **RESULTS**

### 149 **TEMCA2: a second-generation transmission EM camera array**

150 Current volume EM methods generally trade off between convenient sample handling, high  
151 image resolution, and rapid image acquisition (Briggman and Bock, 2012). Transmission EM  
152 (TEM) camera arrays (TEMCA2s) offer high signal-to-noise and high throughput imaging of serial  
153 thin sections (Bock et al., 2011; Lee et al., 2016). Post-section staining increases sample  
154 contrast over alternative methods that rely on *en bloc* staining, and features of interest may be  
155 re-imaged at higher magnifications. However, lossless serial sectioning and imaging of  
156 thousands of sections is a technically challenging, manual process; the image data are  
157 anisotropic (i.e., each voxel is narrower than it is tall, typically 4 x 4 x 45 nm), which is  
158 inconvenient for processing by automated segmentation pipelines; and large sample areas  
159 represented by mosaics of thousands of overlapping individual camera images necessitate a  
160 sophisticated and scalable stitching pipeline (Saalfeld et al., 2012; Wetzell et al., 2016).

161 Despite these challenges, the potential for gains in throughput persuaded us to develop a  
162 second-generation system (TEMCA2) prior to undertaking a *Drosophila* whole-brain imaging  
163 effort (Figure 1; Figure S2). To achieve high frame rates in TEM, electron dose is simply  
164 increased until the sensors are saturated in the desired image frame integration period. This  
165 option is generally not available in scanning EM (SEM)-based approaches, since coulomb  
166 repulsion between electrons limits the maximum current per beam (Denk and Horstmann,  
167 2004). We constructed a 2 x 2 array of high frame-rate sCMOS-based scientific cameras and



168 coupled them with optical lenses custom-designed for imaging TEM scintillators (Figure 1C). At  
169 this higher electron dose, images are acquired in 4 frames of 35 ms exposure each. Standard  
170 TEM sample holders and goniometer stages take several seconds to step and settle, which is  
171 not fast enough for this imaging scheme. Therefore, we built a high speed, piezo-driven single  
172 axis Fast Stage (Figure 1D; Figure S2B; Movie S1), with a sample holder designed to accept  
173 standard-diameter (3 mm) TEM sample grids (Figure 1E-F). The Fast Stage has the same  
174 shape as a standard sample holder, so that the TEM's standard multi-axis stage can provide  
175 motion in other axes. Step-and-settle with the Fast Stage typically completed in 30-50 ms  
176 (Figure S2C-D). On-line analysis of sample drift between subsequent frames was used to  
177 determine whether stability was sufficient to acquire high-quality images, and frames were  
178 translated before summation to correct for small (16 nm or less) drift between frames. Net  
179 imaging throughput using the TEMCA2 system is ~50 MPix/s, roughly six times faster than the  
180 first-generation TEMCA (Bock et al., 2011). For the whole-brain imaging effort, we constructed  
181 two TEMCA2 systems, yielding an order of magnitude increase relative to previously available  
182 EM imaging throughput.

### 183 **Autoloader: a hands-free robot for automatic and reliable TEM imaging**

184 To allow unattended multi-day imaging, reduce risk to the samples, and decrease the overhead  
185 of sample exchange (10 minutes out of every 30 in typical TEMCA2 operation), we built a  
186 robotic system (Autoloader) capable of autonomous sample exchange and imaging of the TEM  
187 grids (Figure 1G; Figure S2E-F; Movies S2-3). Although automatic sample exchange systems  
188 for TEMs have been built (Lefman et al., 2007; Potter et al., 2004), their capacity and reliability  
189 were insufficient for the whole-brain imaging effort described here. The Autoloader mounts to an  
190 accessory port on the TEM, has its own vacuum system, and completely replaces the off-the-  
191 shelf stage system. To better support automatic sample handling, we made custom 100  $\mu\text{m}$ -

192 thick beryllium-copper sample support grids, each etched with unique ID numbers and spatial  
193 fiducial marks to guide machine vision-based pick-and-place software for grid exchange (Figure  
194 1F). Each support grid is stored in a 64-pocket cassette, and each cassette is stored in an 8-  
195 cassette magazine (Figure 1H). The Autoloader grid positioning system (GPS; Figure 1I-K)  
196 provides high-speed multi-axis grid positioning. A pre-aligner is available for optimizing sample  
197 orientation (Figure 1L; Movies S2-3). Automatic grid exchange is accomplished in about 5  
198 minutes without breaking vacuum.

### 199 **Application of EM infrastructure to image a complete adult fly brain**

200 For a given electron dose, a higher contrast sample scatters more electrons, resulting in a  
201 higher quality image (Denk and Horstmann, 2004). We therefore optimized fixation and  
202 embedding procedures for high membrane contrast, while preserving high quality ultrastructure.  
203 A series of 7,060 sections, encompassing the entire brain, was prepared manually (Figure S3).  
204 Nearly all (99.75%) targeted serial section data were successfully acquired. Ten sections were  
205 lost prior to imaging, and regions of some sections with debris or cracks in the support film were  
206 excluded from imaging. Medium- and large-diameter neurites can still be readily traced through  
207 the missing data, with minimal anticipated impact on traced networks (Schneider-Mizell et al.,  
208 2016). The resulting EM dataset comprises ~21 million images occupying ~106 TB on disk.

209 The data were acquired over a period of ~16 months. Eighty-three percent of imaged sections  
210 were acquired with a TEMCA2 system (4.3 million Fast Stage moves), while the Autoloader was  
211 still in development, and 17% of imaged sections were acquired by the Autoloader (3.5 million  
212 GPS moves; ~6,800 machine vision-guided steps to pick, pre-align, and re-stow each grid).  
213 Eighty-two percent of Autoloader grid exchanges were successful; 14% were automatically  
214 halted and the grids re-stowed, usually due to variations in the manual placement of grids in the  
215 Autoloader cassettes or inhomogeneities in the support film; and 4% required manual control of

216 the Autoloader for re-stowing. Re-stowed grids were removed from the Autoloader and imaged  
217 manually with a Fast Stage on a TEMCA2. No sections were lost or damaged due to Autoloader  
218 or Fast Stage malfunction.

219 The quality of acquired image data was high (Figure 2; Movie S4). Whether a given EM volume  
220 has sufficient resolution to reliably detect synapses and trace fine neuronal processes can  
221 currently only be evaluated empirically (see below). In general, however, image resolution  
222 increases not only with decreasing voxel size, but also with increasing image signal-to-noise  
223 (S/N). We found that the S/N of images in this dataset equals or exceeds that of other publicly  
224 available datasets (Figure 2G; Figure S4). Furthermore, it is straightforward to re-image targeted  
225 regions of interest in the full adult brain volume at higher magnification (Figure S5A-B).

## 226 **Volume reconstruction and validation of tracing by NBLAST-based geometry matching**

227 We developed cluster-backed software to stitch images from a single thin section into a  
228 coherent mosaic, and then to register stitched mosaics across thousands of serial sections into  
229 an aligned volume (Figure 2A-G), a process known as ‘volume reconstruction’. Calibration  
230 mosaics were used to correct lens distortions (Kaynig et al., 2010), and a scalable and linear  
231 solver was developed to stitch all section mosaics independently. During alignment of the  
232 volume, approximately 250 sections were found to be misordered. These misordered sections  
233 were automatically detected and re-ordered over several iterations of coarse and fine series  
234 alignment (Hanslovsky et al., 2017). With this software infrastructure, traced neurons can be  
235 projected across successive volume reconstructions, allowing tracing work to begin before  
236 imaging of the whole brain was complete. Furthermore, high- and low-dose imaging of robust  
237 and fragile areas of a section, respectively, could be stitched together seamlessly (Figure S5 C-  
238 E). Intra-mosaic variations in image tile intensity, created by variations in section thickness,  
239 electron beam etching, or deposition of contaminants from post-staining or section pickup, were

240 corrected (Figure S5 F-I) using a scalable implementation of an existing algorithm (Kazhdan et  
241 al., 2010).

242 To test the reproducibility of tracing in the whole-brain EM dataset, three independent teams,  
243 each comprising two tracers, targeted the same KC for anatomical reconstruction (Figure S6). In  
244 the fly brain, microtubule-free neurites ('twigs') as fine as 40 nm in diameter tend to extend for  
245 short distances before joining larger, microtubule-containing 'backbone' neurites (Schneider-  
246 Mizell et al., 2016). KC claws are good examples of 'twigs', whereas their dendritic trunks and  
247 the axonal neurite leaving the calyx are larger-diameter 'backbones'. The neuronal arbors and  
248 associated synapses reconstructed by each team were essentially identical for both twigs and  
249 backbones. PN to KC claw inputs with high synapse counts were detected in all three  
250 reconstructions (Figure S6C). Consistent with a tracing approach biased toward false negatives  
251 rather than false positives (Methods), one low-synapse-count input was missed by one of the  
252 tracing teams (Figure S6, red asterisks). These independent reconstructions demonstrate that  
253 the EM data support tracing of neuronal connectivity, even in challenging neuropil such as the  
254 microglomeruli of the MB calyx.

255 The stereotypy of the fly brain allows identification and comparison of fluorescently labeled  
256 neurons across individuals, by warping brains imaged at the light level to a standard template  
257 brain (Chiang et al., 2011; Costa et al., 2016; Manton et al., 2014; Milyaev et al., 2012). We  
258 developed tools to register LM datasets to the EM-imaged brain (Methods), allowing precise  
259 overlay of LM onto EM data across multiple brains (Figure 3A-D). This approach can also be  
260 used to analyze EM-traced neurons within existing frameworks for fly neuroanatomy. For  
261 example, the geometric search algorithm, NBLAST (Costa et al., 2016), can be used to search  
262 for an EM-traced PN skeleton thought to arise from the AL glomerulus VM2 (Figure 3E-G) in the  
263 FlyCircuit single neuron collection (Chiang et al., 2011). The VM2 PN is the top hit arising from

264 this query (Figure 3G), with an NBLAST mean score of 0.638. Remarkably, this NBLAST score  
265 is within the range of top scores for the 6 LM-imaged VM2 neurons in the FlyCircuit database  
266 when compared with one another (0.635-0.706), consistent with the high qualitative similarity of  
267 the EM-traced and LM-imaged PNs (Figure 3G).

268 **EM-based reconstruction of complete olfactory input to the MB calyx reveals tight**  
269 **clustering of homotypic PN arbors**

270 To systematically compare EM-based PN reconstructions with available LM data, we identified  
271 all PN to KC microglomeruli in the main MB calyx on the right side of the fly's brain, and traced  
272 the originating PNs sufficiently to identify their subtype (Figure 4). We classified olfactory PNs  
273 known to arise from a single glomerulus in AL based on assessment of each PN's dendritic  
274 distribution in AL (Figure 4B) and its axonal arbor in LH. We found that the great preponderance  
275 of input to the MB main calyx is olfactory, consistent with LM data. Of the 576 microglomerular  
276 boutons in main calyx, 500 arose from olfactory PNs (87%, from 120 PNs). Of these, 20 boutons  
277 (3%) arose from 8 multiglomerular PNs. The other inputs to main calyx included 50 boutons  
278 from thermosensory PNs (9%, arising from 8 neurons); 9 boutons from other PNs (2%, arising  
279 from 5 neurons), traveling either via tracts alternative to the mALT (7 boutons from 4 PNs) or  
280 from the subesophageal region (2 boutons from 1 putative PN; data not shown); and 17 boutons  
281 (3%) arising from a previously unknown neuron that we name MB-CP2 and describe further  
282 below. This survey located 51 out of the 52 previously described olfactory glomeruli (Grabe et  
283 al., 2015); VP4 was not located. The existence of an additional glomerulus, DL6, has been  
284 disputed (Grabe et al., 2015) and we likewise did not locate it. We also found 3 neurons arising  
285 from glomeruli VC5 or VC3I, which we could not disambiguate based on our tracing data. These  
286 glomeruli are not consistently divided in the literature, and the molecular identity of their  
287 incoming olfactory receptor neurons is not yet clear.

288 Despite these caveats, nearly all (48/52, 92%) previously described subtypes of uniglomerular  
289 olfactory PNs were unambiguously identified (Grabe et al., 2015), setting the stage for future  
290 trans-synaptic mapping of circuitry downstream of molecularly identified olfactory pathways in  
291 the fly brain. The arbors of selected subtypes formed concentric clusters in MB main calyx  
292 (Figure 4C), consistent with previous LM data (Tanaka et al., 2004). Unsupervised clustering  
293 based on NBLAST score grouped PNs of the same assigned type (Figure 4D), and in nearly all  
294 cases, the expert PN type assignments and NBLAST scores were in good agreement (Table  
295 S1). The number of PNs found to arise from each glomerulus (Figure 4E) was also in excellent  
296 agreement with recent LM data (Grabe et al., 2016).

297 We found that PNs arising from the same glomeruli often show much tighter clustering (Figure  
298 5, Figure S7) than predicted from LM data pooled across multiple animals (Jefferis et al., 2007).  
299 The PN cluster at the center of the concentrically arranged arbors shown in Figure 4C (arising  
300 from DA1, DC3, and VA1d glomeruli) was also qualitatively tighter in the EM data than in LM  
301 data pooled across multiple animals (Figure 5A, bottom row). Quantification of the average  
302 distance between homotypic PNs revealed that intra-animal arbors are significantly more  
303 clustered than arbors from multi-animal LM data (Figure 5B-C). A similar result was obtained  
304 based on NBLAST score differences (Figure S7B-C). The tight clustering of EM-traced PNs  
305 suggests developmental co-fasciculation of homotypic inputs, and may bias the sampling of  
306 olfactory input by KCs (see Discussion).

### 307 **A previously unknown cell type, MB-CP2, provides input to Kenyon cell claws**

308 To assess the utility of the whole-brain EM dataset for characterizing previously unknown cell  
309 types, we chose to make a fuller reconstruction of one of the unidentified microglomerular inputs  
310 to the MB calyx mentioned above, which we name MB-CP2 (“Mushroom Body Calyx  
311 Pedunculus #2”; Figure 6, Movie S5), per the naming convention of Tanaka et al. (2008). We

312 traced this neuron's backbone to completion as well as that of its equivalent on the contralateral  
313 hemisphere (Figure 6A). The same 10 neuropil compartments were symmetrically innervated by  
314 each MB-CP2 neuron on either side of the brain (Figure 6A,F). In contrast to PNs, which receive  
315 input from olfactory receptor neurons (ORNs), MB-CP2 receives input from higher-order  
316 compartments in the protocerebrum, far from the sensory periphery (Movie S5). These include  
317 the superior medial protocerebrum (SMP), superior intermediate protocerebrum (SIP), and  
318 superior lateral protocerebrum (SLP), which are relatively little-studied compartments innervated  
319 by both sensory and motor neurons (Tschida and Bhandawat, 2015). MB-CP2 dendrites in the  
320 MB pedunculus and  $\gamma 1$  compartment of the MB lobes are also postsynaptic to KCs, specifically  
321 the  $\gamma$  (Figure 6B-C) and  $\gamma d$  (data not shown) subtypes. In the MB main calyx, MB-CP2 provides  
322 microglomerular bouton input to all 5 olfactory KC subtypes ( $\gamma$ ,  $\alpha\beta c$ ,  $\alpha\beta s$ ,  $\alpha'\beta'm$ , and  $\alpha'\beta'ap$ ), but  
323 only in the anteroventral main calyx (Figure 6D-E). In the MB dorsal accessory calyx (dAC),  
324 which receives gustatory, thermosensory, and visual inputs (Kirkhart and Scott, 2015; Vogt et  
325 al., 2016; Yagi et al., 2016). MB-CP2 is presynaptic to  $\alpha\beta p$  KCs throughout the entire dAC (data  
326 not shown). The two MB-CP2 neurons may therefore provide multimodal and recurrent  
327 feedback from  $\gamma$  KC axons to a subset of KC dendrites in the main calyx, adding to the set of  
328 known MB recurrent networks (Aso et al., 2014; Oswald and Waddell, 2015).

### 329 **Identification of cell types post-synaptic to Kenyon cells in the MB calyx**

330 Kenyon cells are presynaptic in the MB calyx, but their postsynaptic targets are unknown  
331 (Butcher et al., 2012; Christiansen et al., 2011). To identify these postsynaptic partners, we  
332 annotated all presynaptic release sites arising from 3 KCs of each subtype ( $\gamma$ ,  $\alpha\beta c$ ,  $\alpha\beta s$ ,  $\alpha'\beta'm$ ,  
333 and  $\alpha'\beta'ap$ ) with dendrites in the main calyx (Aso et al., 2014). We then traced their postsynaptic  
334 targets to classification (Figure 7; see Methods). All KC presynaptic release sites targeted  
335 multiple postsynaptic processes. Consistent with immunohistochemical data (Christiansen et al.,

336 2011), most (82%; Table S2) pre-synaptic release sites were in  $\alpha\beta$ c-,  $\alpha\beta$ s-, or  $\gamma$  KCs, and 87%  
337 of the release sites were distributed along KC dendrites outside of claws. Of the 15 cell types  
338 known to arborize within the MB calyx (Aso et al., 2014; Burke et al., 2012; Busch et al., 2009;  
339 Chen et al., 2012; de Haro et al., 2010; Mao and Davis, 2009; Roy et al., 2007; Tanaka et al.,  
340 2008), we found that a small subset contributes most of the postsynaptic neurites (4 subtypes  
341 contributing 75% of neurites; see Table S2). These are: the dendrites of other KCs; the APL, a  
342 wide-field inhibitory neuron that innervates the entire MB and sparsifies KC activity (Lin et al.,  
343 2014; Liu and Davis, 2009); MB-CP1, an MBON whose dendritic arbor innervates the calyx and  
344 pedunculus (Tanaka et al., 2008); and two MB-C1 neurons, a class of interneuron that  
345 innervates the calyx and lateral horn (Tanaka et al., 2008). Fourteen percent of fine postsynaptic  
346 neurites were too difficult to readily trace back to parent backbone. Intriguingly,  $\alpha'\beta'$  KCs were  
347 presynaptic only to APL and other KCs. A large fraction of KC presynaptic release sites  
348 therefore targets a specific and sparse subset of available cell types in calyx.

349

## 350 **DISCUSSION**

351 Here we contribute a complete EM volume of an adult female *Drosophila melanogaster* brain for  
352 free use by the research community. We identified PNs from nearly all the olfactory PN  
353 subtypes, and then traced PN output across two synapses – from PNs to KCs, and from KCs to  
354 their post-synaptic targets in the MB calyx – demonstrating that this dataset supports tracing of  
355 brain-spanning neural circuitry at synaptic resolution. Cell type identification of PNs was helped  
356 by software to search EM-traced neuronal arbors for matches in large-scale morphological  
357 databases. With the PN types classified, any molecularly identified olfactory pathway in the fly  
358 brain can now be mapped, which will likely aid in the determination of circuit mechanisms  
359 underlying intrinsic and learned behavioral responses to odors. Since PN odorant tuning,



360 molecular identity, and morphology are all highly stereotyped, a great deal of information from  
361 other experiments can be directly related to the circuits mapped in this dataset. This same  
362 approach is generalizable to many other circuits underlying learned and intrinsic behaviors in  
363 this animal.

364 Generation of volume EM data of this scale remains technically challenging across all stages of  
365 the data pipeline. Our new generation of image acquisition hardware provided images with  
366 excellent signal-to-noise and unmatched throughput. Many further optimizations of this  
367 hardware are available. Emerging large-format, high-speed fiber-coupled cameras and direct  
368 electron detectors may achieve imaging throughput comparable to the TEMCA2, while requiring  
369 substantially lower electron dose due to their greater sensitivity (Ruskin et al., 2013). Multibeam-  
370 SEM also shows great promise (Eberle et al., 2015), as do slower but higher resolution methods  
371 such as parallel FIB-SEM imaging of slabs cut by hot knife methods (Xu et al., 2017). Low  
372 resolution EM imaging, followed by high resolution re-imaging of synaptic connectivity in  
373 selected sub-volumes, also holds promise for brain-spanning connectomics in larger animals  
374 (Hildebrand et al., 2017). Manual sectioning of long series of thin sections is not routinely  
375 replicable by most practitioners; efforts are currently underway to automate this process.

376 Stitching and registration of serial section mosaics at the scale of this dataset posed a  
377 significant challenge. We developed scalable software for volume reconstruction and image  
378 intensity correction, as well as a data store for managing the image transformations between  
379 raw data and any given volume reconstruction. Although the resulting registration quality is  
380 clearly sufficient for manual tracing efforts, remaining fine-scale imprecision may need to be  
381 overcome before emerging automatic segmentation methods can be fully leveraged (Arganda-  
382 Carreras et al., 2017; Beier et al., 2017; Januszewski et al., 2016). Early segmentation results  
383 with subsets of this whole-brain dataset are nonetheless promising (Funke et al., 2016).

384 Our analysis of the MB main calyx revealed that PNs arising from the same glomerulus often  
385 cluster more tightly in the calyx than was expected from LM data pooled across many animals.  
386 Interestingly, the intra-animal dye-filled DM6 PN pairs in Figure 6 of (Kazama and Wilson, 2009)  
387 also are tightly clustered, although this result is anecdotal. The basis of this clustering may be  
388 developmental, with sister PNs arising from the same glomerulus or neuronal lineage (Spindler  
389 and Hartenstein, 2010) tending to co-fasciculate. Tight intra-animal clustering of PNs raises the  
390 possibility that the PN to KC connectivity matrix may be biased, rather than fully random. If  
391 boutons from a given PN type are clustered tightly in the calyx, and a given KC happens to have  
392 a distribution of claws centered on that PN cluster, then the KC will have greater opportunity to  
393 receive input from that PN type. This may explain the above-chance convergence of DA1, DC3,  
394 and VA1d PNs onto postsynaptic KCs observed by Gruntman and Turner (2013). Indeed, our  
395 EM reconstructions indicate that these three PN types are tightly clustered at the center of the  
396 MB calyx, consistent with the earlier LM data of Tanaka et al. (2004). However, the most  
397 thorough examination of PN to KC connectivity to date, using partial connectivity data pooled  
398 across many animals, was consistent with a model in which the PN to KC connectivity matrix is  
399 entirely random (Caron et al., 2013). More comprehensive mapping of the KC population  
400 postsynaptic to PNs will help determine whether intra-animal biases in the PN to KC connectivity  
401 map exist, and the effect this bias may have (if any) on the overall KC sampling of olfactory  
402 input.

403 Our survey of input to KC claws in the MB calyx also revealed a new cell type, MB-CP2, which  
404 likely provides recurrent and multimodal input to a small fraction of KCs in the main calyx. Even  
405 in well-described brain regions, it is not uncommon for new cell types to be discovered by EM  
406 (Helmstaedter et al., 2013; Takemura et al., 2017a), or by LM in combination with increased  
407 coverage of genetic driver lines (Aso et al., 2014). The finding of a new input cell type to KC

408 claws is also consistent with the “projection neurons innervating unknown regions of the brain”  
409 occasionally seen by Caron et al. (2013); see their Supplementary Table 1. Development of a  
410 split-GAL4 driver line for MB-CP2 would facilitate characterization of this neuron’s role in MB  
411 circuitry.

412 There is extensive recurrent microcircuitry between neurites within the MB calyx (Butcher et al.,  
413 2012), but the cell type identity of participating neurons has been elusive. We traced neurons  
414 postsynaptic to KC dendrites to identify their cell types, setting the stage for future interrogation  
415 of these fine-scale interactions by complementary high-resolution physiological and anatomical  
416 methods. We discovered that KC dendrites predominantly target a sparse subset of available  
417 cell types, including the wide-field inhibitory neuron APL, other KCs, the MBON MB-CP1, and  
418 MB-C1, an inhibitory neuron that innervates calyx and lateral horn. Interestingly,  $\alpha\beta'$  KC  
419 dendrites are even more selective, targeting only the APL and other KCs. This may be related to  
420 their specific role in memory and learning; unlike other KC subtypes,  $\alpha\beta'$  KCs are dispensable  
421 for memory retrieval (Krashes et al., 2007). Recurrent, fine-scale microcircuitry seems to be a  
422 general feature of the fly neuropil (Meinertzhagen and O’Neil, 1991; Schurmann, 2016;  
423 Takemura et al., 2017a; our unpublished observations), and identification of participating cell  
424 types will be an important initial step toward understanding microcircuit operation in many areas  
425 of the brain.

426 *Drosophila* exhibits a wide range of complex sensory- and memory-guided behaviors, including  
427 visual place learning, tactile-guided sequential grooming, olfactory-memory-guided courtship,  
428 escape, and vision-guided flight. The algorithms underlying behavior are implemented by  
429 neuronal circuits, and neuronal circuits are defined in large part (though certainly not entirely;  
430 Bargmann and Marder, 2013) by the synaptic connectivity between neurons. The connectome  
431 therefore is necessary to Marr’s (1982) implementation-level of analysis, and may aid in the

432 inference of underlying algorithms as well. The dataset we share here will help establish a  
433 structural scaffold for models of circuit function in the fly.

434

## 435 **Figure and Table Legends**

436 **Figure 1. Target Volume and EM Acquisition Infrastructure. See also Figure S1, Figure S2,**  
437 **Figure S3, Movie S1, Movie S2, Movie S3.**

438 (A) Oblique view of a surface model of the *Drosophila* brain (gray mesh) with specific neuropils  
439 highlighted: antennal lobe (orange); mushroom body (pink); lateral horn (turquoise).

440 (B) Schematic of olfactory pathway. Projection neurons (PNs) originate from antennal lobe and  
441 their axons pass through the MB calyx, forming *en passant* synapses with MB output neurons  
442 (MBONs), before terminating in the LH.

443 (C) Left, schematic of TEMCA2 vacuum extension, scintillator, and camera array. Right, camera  
444 field of views (FOVs) diagram, indicating the non-overlapping FOV of each camera on  
445 scintillator.

446 (D) FEI CompuStage-compatible single-axis Fast Stage.

447 (E) Fast Stage grid holder.

448 (F) Custom-etched 2x1mm slot grid with fiducial marks, 2-D barcodes, and unique serial  
449 identifier.

450 (G) Cassette, magazines, and four-axis stage inside the Autoloader vacuum.

451 (H) Autoloader cassettes and magazines.

452 (I) Grid holder and end-effector of Autoloader grid positioning system (GPS). Arrows: prism and  
453 LED assembly (red); sample grid (black); lever of the grip assembly which actuates grid release  
454 when retracted against its stop on the stage housing (white).

455 (J) Autoloader end-effector

456 (K) Four-axis Autoloader stage. Arrows: grid positioning system (GPS) chamber (blue); view  
457 port (red); cassette shuttle chamber (black); end effector and miniature camera (white). (L)  
458 Rotational aligner integrated into the Autoloader cassette shuttle.

459 (L) Rotational aligner integrated into the Autoloader cassette shuttle.

460

461 **Figure 2. Reconstructed Image Volume. See also Figure S4, Figure S5, Figure S6.**

462 (A-F) Renderings of brain-spanning EM in the sectioning plane (x-y axes) at successive zoom  
463 levels. All panels rendered using the ELM viewer (Methods), which averages several adjacent  
464 sections to improve contrast at low magnifications. Red dotted lines in left column indicate  
465 orthogonal (y-z axes) section plane through the brain volume, rendered in right column. “D-V”  
466 and “A-P” indicate the dorso-ventral and anterior-posterior axes, respectively.

467 (G) Image S/N versus acquisition speed for the current dataset and several publicly  
468 downloadable volume EM data sets acquired via different techniques (Table S3). Acquisition  
469 speed is in logarithmic scale. We assume all methods are shot-noise limited; for comparison  
470 purposes signal-to-noise values have therefore been normalized to the TEMCA2 voxel size  
471 (4x4x40 nm) by the square root of the source data’s voxel size (Methods).

472 (H-K) Serial thin sections succeeding the one in F. Fine processes can be followed across serial  
473 sections and section-to-section image registration is accurate enough to provide a consistent  
474 field of view.

475 Scale bars: 200  $\mu\text{m}$  in (A), 100  $\mu\text{m}$  in (B); 25  $\mu\text{m}$  in (C); 10  $\mu\text{m}$  in (D); 2  $\mu\text{m}$  in (E); 0.4  $\mu\text{m}$  in (F,  
476 H-K).

477

478 **Figure 3. Validation of Tracing by EM-LM Registration and NBLAST-based Geometry**  
479 **Matching.**

480 (A-D) ELM can be used to define a three-dimensional warp field between the EM data set and a  
481 light-level template brain such that EM-imaged and LM-imaged brains are in a common  
482 template space. Same oblique cut plane shown in A-D.

483 (A) Oblique cut plane through the EM volume contains the AL and mALT (orange) that project  
484 from AL to MB calyx (red), and LH (green).

485 (B) The LM template brain immunofluorescently labeled with synapse-specific nc82 (magenta).  
486 The mALT is devoid of synapse-labeling.

487 (C) LM data of a subset of PNs labeled with random fluorophore combinations using FLP-out  
488 technique.

489 (D) Overlay of A-C. All LM datasets that have been aligned to the template brain can be  
490 projected onto the EM dataset.

491 (E) An EM-traced putative VM2 PN (black skeleton), projected to a template brain (gray surface  
492 mesh) using the inverse of the transformation previously defined to align the template brain to  
493 the EM dataset in B.

494 (F) Top hit resulting from an NBLAST search of the FlyCircuit database using the EM-traced PN  
495 (red) as a query structure. The annotated class in the VFB database is VM2.

496 (G) Overlay of the EM and LM PNs shows great structural similarity.

497 Scale bars: ~100  $\mu\text{m}$  in (A-D), ~50  $\mu\text{m}$  in (E-G).

498

499 **Figure 4. Survey of Olfactory PNs Providing Driving Input to Microglomeruli in the Main**  
500 **MB Calyx Agrees with LM Data. See also Table S1.**

501 (A) Frontal view of olfactory PNs on the right hemisphere. A majority of PNs extend dendrites  
502 into glomeruli in antennal lobe (AL) while their axons pass through calyx, forming *en passant*  
503 synapses with KCs, and terminate in lateral horn (LH). A few project directly to the LH via the  
504 mIALT.

505 (B) Frontal view of reconstructed PN skeletons (upper panel) and glomerular surface models  
506 (lower panel) in AL.

507 (C) Concentric organizations revealed in frontal-dorsal view of PN boutons in calyx.  
508 Reconstructed bouton skeletons (upper panel) and 2D projection (lower panel) of a bouton  
509 surface rendering, integrated on the Z (anterior-posterior) axis for each of 3 groups respectively.  
510 PNs from DM1, VA4, VC1, VM2 (green); DL1 and VA6 (blue); DA1, DC3, and VA1d (red).

511 (D) Dendrogram produced by hierarchical clustering of uniglomerular olfactory PNs based on  
512 morphological similarity described by NBLAST.

513 (E) Comparison of number of PNs per glomerulus in the EM data, versus those in Grabe et al.  
514 (2016).

515 Colors: (A-B, D) PN colors represent sensillum type (see legend in A) for their corresponding  
516 olfactory receptor neuron (ORN) class. Color code is the same as in Couto et al. (2005) Figure  
517 4A.

518 Abbreviations: LB, large basiconic; TB, thin basiconic; SB, small basiconic; T1, T2, T3, trichoid  
519 sensilla; PB, maxillary palp basiconic, AC, antennal coeloconic; AI, antennal intermediate.

520 Scale bars: ~10  $\mu\text{m}$  in (A-C).

521

522 **Figure 5. PN Arbors in Calyx Cluster More Tightly Than Previously Seen with LM Across**  
523 **Individuals. See also Figure S7.**

524 (A) Comparisons of PN tracings in EM and LM. Left column shows entire PNs with right calyx  
525 neuropil in gray. Middle and right columns show EM and LM PN skeletons, respectively, in  
526 calyx.

527 (B) Pair-wise mean nearest distance for homotypic PN calyx collaterals. Glomeruli are ordered  
528 by the difference of mean distances between EM and LM PNs. Each data point represents the  
529 mean of nearest distance between the calyx collaterals of a pair of PNs from the same  
530 glomerulus. The same number of LM PNs as EM PNs is sampled from the existing database of  
531 LM neurons (Costa et al., 2016; Jefferis et al., 2007). Only glomeruli innervated by two or more  
532 PNs in the EM data are shown.

533 (C) Histogram of all data points in (B). The total average distance for all EM PN pairs was  
534 significantly shorter than that for all LM PN pairs ( $3.53 \pm 1.63 \mu\text{m}$  versus  $5.53 \pm 2.65 \mu\text{m}$ , t test  
535 p-value  $1.3\text{e-}12$ ).

536 Scale Bars: ~20  $\mu\text{m}$  in (A) left column; ~10  $\mu\text{m}$  in (A), middle and right columns.

537

538 **Figure 6. MB-CP2, a New Cell Type Providing Microglomerular Input to KC Claws.**

539 (A) 3D rendering of this neuron in both hemispheres with LM meshes of whole brain (gray) and  
540 MB (green).



541 (B-E) TEM of synapses between MB-CP2 and KCs. MB-CP2 processes (orange); confirmed  
542 KC processes (green).

543 (B-C) Example synapses of MB-CP2 postsynaptic to  $\gamma$ KCs in pedunculus, right and left  
544 hemispheres, respectively.

545 (D-E) Example synapses of MB-CP2 microglomerular organization in the main calyx, right and  
546 left hemispheres, respectively.

547 (F) Summary schematic of MB-CP2 input and output brain regions with synaptic counts  
548 discovered thus far. This neuron innervates 10 distinct neuropils. Abbreviations: Ped,  
549 pedunculus; LH, lateral horn; dAC, dorsal accessory calyx; SC, superior clamp; PLP, posterior  
550 lateral protocerebrum; SMP, superior medial protocerebrum; SIP, superior intermediate  
551 protocerebrum; SLP, superior lateral protocerebrum.

552 Scale Bars: 100  $\mu$ m in (A), dorsal view; 500  $\mu$ m in (B-C); 2  $\mu$ m in (D-E).

553

554 **Figure 7. KC Presynaptic Release Sites in the MB Main Calyx Mostly Target a Small**  
555 **Subset of Available Partners.**

556 (A-D) Morphological comparison of LM data (left) and EM-reconstructed skeletons (right) for the  
557 same classes of neurons.

558 (A)  $\alpha\beta$ c- (green),  $\alpha\beta$ s- (yellow), and  $\gamma$ - (cyan, blue) KCs. LM data shows the entire population for  
559 these three KC classes. EM data shows one KC of each of the three classes. Inset location  
560 indicated by the smaller red box. Inset shows the dendritic arm and claw of the  $\gamma$  KC that is  
561 presynaptic in (E). Black arrowhead indicates the location of the synapse in (E). Note the  
562 synapse is outside of the KC claw.

563 (B) The APL neuron.

564 (C) The MB- CP1 output neuron.

565 (D) The MB-C1 putatively GABAergic interneuron. Inset location indicated by the smaller red  
566 box. Inset shows the dendritic arm and claw of the  $\gamma$  KC that is presynaptic in F. This KC is not  
567 shown in D for visual clarity. Black arrowhead indicates the location of the synapse in F. Note  
568 the synapse is outside of the KC claw.

569 (E-F) TEM micrographs of KC divergent polyadic presynaptic release sites in the MB main  
570 calyx. White arrowheads indicate visible presynaptic release sites. In general the same color  
571 code is used to indicate same classes of neurons between (A-D) and (E-F). Black arrowhead  
572 (A) points to the same location in the 3D skeleton as white arrowhead points to in EM  
573 micrograph (E); same is true for black arrowhead in (D) and white arrowhead in (F).

574 (E) The  $\gamma$  KC from A inset (blue) and two other  $\gamma$  KCs (light purple and dark purple, presynaptic  
575 release sites not visible in this section) are convergently presynaptic to the APL (green), the MB-  
576 CP1 (red), and each other at the same synaptic cleft. The APL is presynaptic to a PN (orange)  
577 in this section plane.

578 (F) The  $\gamma$  KC from D inset (blue) is presynaptic via a divergent polyad to MB-C1 (pink), and the  
579 APL (green) two sections away (not visible in this section), and several additional unidentified  
580 partners.

581 Scale Bars:  $\sim 25 \mu\text{m}$  in (A-D),  $1 \mu\text{m}$  in (E-F).

582

### 583 **Author Contributions**

584 Conceptualization, D.D.B., R.D.F., J.S.L., Z.Z.; Methodology, D.D.B., R.D.F., J.S.L., D.M., J.P.,  
585 C.G.R., O.T., Z.Z.; Software, J.B., P.H., G.S.X.E.J., B.K., K.K., M.K., M.N., D.M., E.P., E.T.T.,  
586 O.T., S.S.; Validation, J.S.L.; Formal Analysis, D.D.B., G.S.X.E.J., J.S.L., M.N., Z.Z.;

587 Investigation, I.J.A., D.D.B., S.A.C-S., C.B.F., L.K., J.S.L., C.G.R., N.S., Z.Z. ; Data Curation,  
588 J.B., R.D.F., J.S.L., D.M., M.N., E.P., C.G.R., S.S., Z.Z.; Writing – Original Draft, D.D.B., J.S.L.,  
589 M.N., E.P., C.G.R., Z.Z; Writing – Review and Editing, D.D.B., G.S.X.E.J., B.K., N.S., J.S.L.,  
590 Z.Z.; Visualization, D.D.B., S.A.C-S., J.S.L., Z.Z.; Supervision, D.D.B., J.S.L.; Project  
591 Administration, D.D.B.; Funding Acquisition, D.D.B.

592

593

594

## 595 **Acknowledgements**

596 Jeff Jordan, Bruce Bowers, and Jon Arnold (Janelia Instrumentation Design & Fabrication  
597 team); Dana Dunkelberger (Grant Scientific); Jim Mancuso (AMT Imaging): hardware design &  
598 engineering services. Brett Mensh, Scott Waddell, and Vivek Jayaraman: critical improvements  
599 to the manuscript. Wei-Ping Li (Janelia EM Facility): coating of sample grids and poststaining of  
600 serial sections. Najla Masoodpanah, Joseph Hsu, Benjamin Gorko, Emily Moore, Arynne Boyes,  
601 Jacob Ratliff, Adam John, Bailey Harrison, Adeleso Adesina, and Claire Managan: neuron  
602 tracing. Noah Nelson: graph visualization tools. Arlo Sheridan and Ben Gorko: 3D animations.  
603 Philipp Ranft and Gaia Tavosanis: literature review of cell types innervating MB calyx. Adam  
604 Heath, Marta Costa, and Philip Schlegel: glomerulus meshes, NBLAST analyses, and PN  
605 classification. David Peale: optimization of carbon coating and film casting protocol. Jon Arnold:  
606 technical figures. Tom Kazimiers and Andrew Champion: CATMAID development. Albert  
607 Cardona: CATMAID workflow advice, CATMAID development, and helpful discussions. Casey  
608 Schneider-Mizel: analysis code and helpful discussions. Tom Dolafi, Cristian Goina (Janelia  
609 Software Engineering): volume reconstruction support. Rob Lines, Ken Carlisle, Goran Ceric  
610 (Janelia Scientific Computing Systems): data and cluster management. Yoshinori Aso: KC and

611 pre-publication MCFO PN LM data. Eyal Gruntman: helpful discussions. Howard Hughes  
612 Medical Institute: funding support for all aspects of this work. Wellcome Trust: collaborative  
613 award 203261/Z/16/Z for funding additional tracing effort. Competing interests: D.D.B., J.P.  
614 (patent holders).

615

## 616 References

617

618 Arganda-Carreras, I., Kaynig, V., Rueden, C., Eliceiri, K.W., Schindelin, J., Cardona, A., and Seung, H.S.  
619 (2017). Trainable Weka Segmentation: a machine learning tool for microscopy pixel classification.

620 *Bioinformatics* *btx180*.

621 Aso, Y., Hattori, D., Yu, Y., Johnston, R.M., Iyer, N.A., Ngo, T.T., Dionne, H., Abbott, L.F., Axel, R.,  
622 Tanimoto, H., *et al.* (2014). The neuronal architecture of the mushroom body provides a logic for  
623 associative learning. *eLife* *3*, e04577.

624 Aso, Y., Herb, A., Ogueta, M., Siwanowicz, I., Templier, T., Friedrich, A.B., Ito, K., Scholz, H., and  
625 Tanimoto, H. (2012). Three dopamine pathways induce aversive odor memories with different stability.  
626 *PLoS Genet* *8*, e1002768.

627 Bargmann, C.I., and Marder, E. (2013). From the connectome to brain function. *Nat Methods* *10*, 483-  
628 490.

629 Bay, H., Ess, A., Tuytelaars, T., and Van Gool, L. (2008). Speeded-up robust features (SURF). *Computer*  
630 *vision and image understanding* *110*, 346-359.

631 Beier, T., Pape, C., Rahaman, N., Prange, T., Berg, S., Bock, D.D., Cardona, A., Knott, G.W., Plaza,  
632 S.M., Scheffer, L.K., *et al.* (2017). Multicut brings automated neurite segmentation closer to human  
633 performance. *Nat Methods* *14*, 101-102.

634 Bock, D.D., Lee, W.C., Kerlin, A.M., Andermann, M.L., Hood, G., Wetzel, A.W., Yurgenson, S., Soucy,  
635 E.R., Kim, H.S., and Reid, R.C. (2011). Network anatomy and in vivo physiology of visual cortical  
636 neurons. *Nature* *471*, 177-182.

637 Bogovic, J.A., Hanslovsky, P., Wong, A., and Saalfeld, S. (2016). Robust registration of calcium images  
638 by learned contrast synthesis. Paper presented at: Biomedical Imaging (ISBI), 2016 IEEE 13th  
639 International Symposium on (IEEE).

640 Braitenberg, V., and Schüz, A. (1998). *Cortex : statistics and geometry of neuronal connectivity*, 2nd  
641 thoroughly rev. edn (Berlin; New York, Springer).

642 Bresenham, J.E. (1965). Algorithm for computer control of a digital plotter. *IBM Systems journal* *4*, 25-  
643 30.

644 Briggman, K.L., and Bock, D.D. (2012). Volume electron microscopy for neuronal circuit reconstruction.  
645 *Curr Opin Neurobiol* *22*, 154-161.

646 Briggman, K.L., Helmstaedter, M., and Denk, W. (2011). Wiring specificity in the direction-selectivity  
647 circuit of the retina. *Nature* *471*, 183-188.

648 Burke, C.J., Huetteroth, W., Oswald, D., Perisse, E., Krashes, M.J., Das, G., Gohl, D., Silies, M., Certel,  
649 S., and Waddell, S. (2012). Layered reward signalling through octopamine and dopamine in *Drosophila*.  
650 *Nature* *492*, 433-437.

651 Busch, S., Selcho, M., Ito, K., and Tanimoto, H. (2009). A map of octopaminergic neurons in the  
652 *Drosophila* brain. *J Comp Neurol* *513*, 643-667.

- 653 Butcher, N.J., Friedrich, A.B., Lu, Z., Tanimoto, H., and Meinertzhagen, I.A. (2012). Different classes of  
654 input and output neurons reveal new features in microglomeruli of the adult *Drosophila* mushroom body  
655 calyx. *J Comp Neurol* 520, 2185-2201.
- 656 Calonder, M., Lepetit, V., Strecha, C., and Fua, P. (2010). Brief: Binary robust independent elementary  
657 features. Paper presented at: European Conference on Computer Vision (Springer).
- 658 Cardona, A., Saalfeld, S., Schindelin, J., Arganda-Carreras, I., Preibisch, S., Longair, M., Tomancak, P.,  
659 Hartenstein, V., and Douglas, R.J. (2012). TrakEM2 software for neural circuit reconstruction. *PLoS One*  
660 7, e38011.
- 661 Caron, S.J., Ruta, V., Abbott, L.F., and Axel, R. (2013). Random convergence of olfactory inputs in the  
662 *Drosophila* mushroom body. *Nature* 497, 113-117.
- 663 Chen, C.C., Wu, J.K., Lin, H.W., Pai, T.P., Fu, T.F., Wu, C.L., Tully, T., and Chiang, A.S. (2012).  
664 Visualizing long-term memory formation in two neurons of the *Drosophila* brain. *Science* 335, 678-685.
- 665 Chiang, A.S., Lin, C.Y., Chuang, C.C., Chang, H.M., Hsieh, C.H., Yeh, C.W., Shih, C.T., Wu, J.J., Wang,  
666 G.T., Chen, Y.C., *et al.* (2011). Three-dimensional reconstruction of brain-wide wiring networks in  
667 *Drosophila* at single-cell resolution. *Curr Biol* 21, 1-11.
- 668 Chou, Y.H., Spletter, M.L., Yaksi, E., Leong, J.C., Wilson, R.I., and Luo, L. (2010). Diversity and wiring  
669 variability of olfactory local interneurons in the *Drosophila* antennal lobe. *Nat Neurosci* 13, 439-449.
- 670 Christiansen, F., Zube, C., Andlauer, T.F., Wichmann, C., Fouquet, W., Oswald, D., Mertel, S., Leiss, F.,  
671 Tavosanis, G., Luna, A.J., *et al.* (2011). Presynapses in Kenyon cell dendrites in the mushroom body  
672 calyx of *Drosophila*. *J Neurosci* 31, 9696-9707.
- 673 Costa, M., Manton, J.D., Ostrovsky, A.D., Prohaska, S., and Jefferis, G.S. (2016). NBLAST: Rapid,  
674 Sensitive Comparison of Neuronal Structure and Construction of Neuron Family Databases. *Neuron* 91,  
675 293-311.
- 676 Couto, A., Alenius, M., and Dickson, B.J. (2005). Molecular, anatomical, and functional organization of  
677 the *Drosophila* olfactory system. *Curr Biol* 15, 1535-1547.
- 678 Davis, R.L. (2011). Traces of *Drosophila* memory. *Neuron* 70, 8-19.
- 679 De Bruijn, W., Memelink, A., and Riemersma, J. (1984). Cellular membrane contrast and contrast  
680 differentiation with osmium triazole and tetrazole complexes. *The Histochemical Journal* 16, 37-50.
- 681 de Haro, M., Al-Ramahi, I., Benito-Sipos, J., Lopez-Arias, B., Dorado, B., Veenstra, J.A., and Herrero, P.  
682 (2010). Detailed analysis of leucokinin-expressing neurons and their candidate functions in the  
683 *Drosophila* nervous system. *Cell Tissue Res* 339, 321-336.
- 684 Denk, W., and Horstmann, H. (2004). Serial block-face scanning electron microscopy to reconstruct  
685 three-dimensional tissue nanostructure. *PLoS Biol* 2, e329.
- 686 Eberle, A.L., Mikula, S., Schalek, R., Lichtman, J., Knothe Tate, M.L., and Zeidler, D. (2015). High-  
687 resolution, high-throughput imaging with a multibeam scanning electron microscope. *J Microsc* 259, 114-  
688 120.
- 689 Erdogmus, D., Larsson, E.G., Yan, R., Principe, J.C., and Fitzsimmons, J.R. (2004). Measuring the  
690 signal-to-noise ratio in magnetic resonance imaging: a caveat. *Signal processing* 84, 1035-1040.
- 691 Fischler, M.A., and Bolles, R.C. (1981). Random sample consensus: a paradigm for model fitting with  
692 applications to image analysis and automated cartography. *Communications of the ACM* 24, 381-395.
- 693 Frank, D.D., Jouandet, G.C., Kearney, P.J., Macpherson, L.J., and Gallio, M. (2015). Temperature  
694 representation in the *Drosophila* brain. *Nature* 519, 358-361.
- 695 Funke, J., Saalfeld, S., Bock, D.D., Turaga, S.C., and Perlman, E. (2016). MICCAI Challenge on Circuit  
696 Reconstruction from Electron Microscopy Images (CREMI).
- 697 Grabe, V., Baschwitz, A., Dweck, H.K., Lavista-Llanos, S., Hansson, B.S., and Sachse, S. (2016).  
698 Elucidating the Neuronal Architecture of Olfactory Glomeruli in the *Drosophila* Antennal Lobe. *Cell*  
699 *reports* 16, 3401-3413.
- 700 Grabe, V., Strutz, A., Baschwitz, A., Hansson, B.S., and Sachse, S. (2015). Digital in vivo 3D atlas of the  
701 antennal lobe of *Drosophila melanogaster*. *J Comp Neurol* 523, 530-544.

- 702 Gruntman, E., and Turner, G.C. (2013). Integration of the olfactory code across dendritic claws of single  
703 mushroom body neurons. *Nat Neurosci* *16*, 1821-1829.
- 704 Hamos, J.E., Van Horn, S.C., Raczkowski, D., and Sherman, S.M. (1987). Synaptic circuits involving an  
705 individual retinogeniculate axon in the cat. *J Comp Neurol* *259*, 165-192.
- 706 Hampel, S., Franconville, R., Simpson, J.H., and Seeds, A.M. (2015). A neural command circuit for  
707 grooming movement control. *eLife* *4*, e08758.
- 708 Hanslovsky, P., Bogovic, J.A., and Saalfeld, S. (2017). Image-based correction of continuous and  
709 discontinuous non-planar axial distortion in serial section microscopy. *Bioinformatics* *33*, 1379-1386.
- 710 Harris, K.M., Perry, E., Bourne, J., Feinberg, M., Ostroff, L., and Hurlburt, J. (2006). Uniform serial  
711 sectioning for transmission electron microscopy. *J Neurosci* *26*, 12101-12103.
- 712 Heimbeck, G., Bugnon, V., Gendre, N., Keller, A., and Stocker, R.F. (2001). A central neural circuit for  
713 experience-independent olfactory and courtship behavior in *Drosophila melanogaster*. *Proc Natl Acad Sci*  
714 *U S A* *98*, 15336-15341.
- 715 Heisenberg, M. (2003). Mushroom body memoir: from maps to models. *Nat Rev Neurosci* *4*, 266-275.
- 716 Heisenberg, M., and Wolf, R. (1984). *Vision in Drosophila : genetics of microbehavior* (Berlin ; New  
717 York, Springer-Verlag).
- 718 Helmstaedter, M. (2013). Cellular-resolution connectomics: challenges of dense neural circuit  
719 reconstruction. *Nat Methods* *10*, 501-507.
- 720 Helmstaedter, M., Briggman, K.L., and Denk, W. (2008). 3D structural imaging of the brain with photons  
721 and electrons. *Curr Opin Neurobiol* *18*, 633-641.
- 722 Helmstaedter, M., Briggman, K.L., Turaga, S.C., Jain, V., Seung, H.S., and Denk, W. (2013).  
723 Connectomic reconstruction of the inner plexiform layer in the mouse retina. *Nature* *500*, 168-174.
- 724 Hige, T., Aso, Y., Rubin, G.M., and Turner, G.C. (2015). Plasticity-driven individualization of olfactory  
725 coding in mushroom body output neurons. *Nature* *526*, 258-262.
- 726 Hildebrand, D.G.C., Cicconet, M., Torres, R.M., Choi, W., Quan, T.M., Moon, J., Wetzel, A.W., Scott  
727 Champion, A., Graham, B.J., Randlett, O., *et al.* (2017). Whole-brain serial-section electron microscopy  
728 in larval zebrafish. *Nature* *545*, 345-349.
- 729 Hiraoka, J.I. (1972). A holder for mass treatment of grids, adapted especially to electron staining and  
730 autoradiography. *Stain Technol* *47*, 297-301.
- 731 Hoopfer, E.D. (2016). Neural control of aggression in *Drosophila*. *Curr Opin Neurobiol* *38*, 109-118.
- 732 Ito, K., Shinomiya, K., Ito, M., Armstrong, J.D., Boyan, G., Hartenstein, V., Harzsch, S., Heisenberg, M.,  
733 Homberg, U., Jenett, A., *et al.* (2014). A systematic nomenclature for the insect brain. *Neuron* *81*, 755-  
734 765.
- 735 Januszewski, M., Maitin-Shepard, J., Li, P., Kornfeld, J., Denk, W., and Jain, V. (2016). Flood-Filling  
736 Networks. arXiv preprint arXiv:161100421.
- 737 Jefferis, G.S., Potter, C.J., Chan, A.M., Marin, E.C., Rohlfling, T., Maurer, C.R., Jr., and Luo, L. (2007).  
738 Comprehensive maps of *Drosophila* higher olfactory centers: spatially segregated fruit and pheromone  
739 representation. *Cell* *128*, 1187-1203.
- 740 Jenett, A., Rubin, G.M., Ngo, T.T., Shepherd, D., Murphy, C., Dionne, H., Pfeiffer, B.D., Cavallaro, A.,  
741 Hall, D., Jeter, J., *et al.* (2012). A GAL4-driver line resource for *Drosophila* neurobiology. *Cell reports* *2*,  
742 991-1001.
- 743 Jiang, H., and Sun, S.X. (2013). Cellular pressure and volume regulation and implications for cell  
744 mechanics. *Biophysical journal* *105*, 609-619.
- 745 Kashif, M., Deserno, T.M., Haak, D., and Jonas, S. (2016). Feature description with SIFT, SURF, BRIEF,  
746 BRISK, or FREAK? A general question answered for bone age assessment. *Computers in biology and*  
747 *medicine* *68*, 67-75.
- 748 Kasthuri, N., Hayworth, K.J., Berger, D.R., Schalek, R.L., Conchello, J.A., Knowles-Barley, S., Lee, D.,  
749 Vazquez-Reina, A., Kaynig, V., Jones, T.R., *et al.* (2015). Saturated Reconstruction of a Volume of  
750 Neocortex. *Cell* *162*, 648-661.

- 751 Kaynig, V., Fischer, B., Muller, E., and Buhmann, J.M. (2010). Fully automatic stitching and distortion  
752 correction of transmission electron microscope images. *J Struct Biol* 171, 163-173.
- 753 Kazama, H., and Wilson, R.I. (2009). Origins of correlated activity in an olfactory circuit. *Nat Neurosci*  
754 12, 1136-1144.
- 755 Kazhdan, M., Surendran, D., and Hoppe, H. (2010). Distributed gradient-domain processing of planar and  
756 spherical images. *ACM Transactions on Graphics (TOG)* 29, 14.
- 757 Kim, A.J., Fenk, L.M., Lyu, C., and Maimon, G. (2017). Quantitative Predictions Orchestrate Visual  
758 Signaling in *Drosophila*. *Cell* 168, 280-294 e212.
- 759 Kirkhart, C., and Scott, K. (2015). Gustatory learning and processing in the *Drosophila* mushroom bodies.  
760 *J Neurosci* 35, 5950-5958.
- 761 Ko, H., Hofer, S.B., Pichler, B., Buchanan, K.A., Sjostrom, P.J., and Mrsic-Flogel, T.D. (2011).  
762 Functional specificity of local synaptic connections in neocortical networks. *Nature* 473, 87-91.
- 763 Krashes, M.J., Keene, A.C., Leung, B., Armstrong, J.D., and Waddell, S. (2007). Sequential use of  
764 mushroom body neuron subsets during *drosophila* odor memory processing. *Neuron* 53, 103-115.
- 765 Kuwajima, M., Mendenhall, J.M., Lindsey, L.F., and Harris, K.M. (2013). Automated transmission-mode  
766 scanning electron microscopy (tSEM) for large volume analysis at nanoscale resolution. *PLoS One* 8,  
767 e59573.
- 768 Kvon, E.Z., Kazmar, T., Stampfel, G., Yanez-Cuna, J.O., Pagani, M., Schernhuber, K., Dickson, B.J., and  
769 Stark, A. (2014). Genome-scale functional characterization of *Drosophila* developmental enhancers in  
770 vivo. *Nature* 512, 91-95.
- 771 Lambert, T.J., and Waters, J.C. (2016). Navigating challenges in the application of superresolution  
772 microscopy. *The Journal of Cell Biology*.
- 773 Lauritzen, J.S., Sigulinsky, C.L., Anderson, J.R., Kalloniatis, M., Nelson, N.T., Emrich, D.P., Rapp, C.,  
774 McCarthy, N., Kerzner, E., Meyer, M., *et al.* (2016). Rod-cone crossover connectome of mammalian  
775 bipolar cells. *J Comp Neurol*.
- 776 Lee, W.C., Bonin, V., Reed, M., Graham, B.J., Hood, G., Glattfelder, K., and Reid, R.C. (2016). Anatomy  
777 and function of an excitatory network in the visual cortex. *Nature* 532, 370-374.
- 778 Lefman, J., Morrison, R., and Subramaniam, S. (2007). Automated 100-position specimen loader and  
779 image acquisition system for transmission electron microscopy. *J Struct Biol* 158, 318-326.
- 780 Li, D., Shao, L., Chen, B.C., Zhang, X., Zhang, M., Moses, B., Milkie, D.E., Beach, J.R., Hammer, J.A.,  
781 3rd, Pasham, M., *et al.* (2015). ADVANCED IMAGING. Extended-resolution structured illumination  
782 imaging of endocytic and cytoskeletal dynamics. *Science* 349, aab3500.
- 783 Lichtman, J.W., and Sanes, J.R. (2008). Ome sweet ome: what can the genome tell us about the  
784 connectome? *Curr Opin Neurobiol* 18, 346-353.
- 785 Lin, A.C., Bygrave, A.M., de Calignon, A., Lee, T., and Miesenbock, G. (2014). Sparse, decorrelated  
786 odor coding in the mushroom body enhances learned odor discrimination. *Nat Neurosci* 17, 559-568.
- 787 Lin, H.H., Lai, J.S., Chin, A.L., Chen, Y.C., and Chiang, A.S. (2007). A map of olfactory representation  
788 in the *Drosophila* mushroom body. *Cell* 128, 1205-1217.
- 789 Liu, C., Placais, P.Y., Yamagata, N., Pfeiffer, B.D., Aso, Y., Friedrich, A.B., Siwanowicz, I., Rubin,  
790 G.M., Preat, T., and Tanimoto, H. (2012). A subset of dopamine neurons signals reward for odour  
791 memory in *Drosophila*. *Nature* 488, 512-516.
- 792 Liu, X., and Davis, R.L. (2009). The GABAergic anterior paired lateral neuron suppresses and is  
793 suppressed by olfactory learning. *Nat Neurosci* 12, 53-59.
- 794 Lowe, D.G. (2004). Distinctive image features from scale-invariant keypoints. *International journal of*  
795 *computer vision* 60, 91-110.
- 796 Manton, J.D., Ostrovsky, A.D., Goetz, L., Costa, M., Rohlfing, T., and Jefferis, G.S. (2014). Combining  
797 genome-scale *Drosophila* 3D neuroanatomical data by bridging template brains. *bioRxiv*, 006353.
- 798 Mao, Z., and Davis, R.L. (2009). Eight different types of dopaminergic neurons innervate the *Drosophila*  
799 mushroom body neuropil: anatomical and physiological heterogeneity. *Front Neural Circuits* 3, 5.

- 800 Marr, D. (1969). A theory of cerebellar cortex. *J Physiol* 202, 437-470.
- 801 Marr, D. (1982). *Vision: A computational investigation into the human representation and processing of*  
802 *visual information*, Henry Holt and Co. Inc, New York, NY 2, 4.2.
- 803 McGuire, B.A., Gilbert, C.D., Rivlin, P.K., and Wiesel, T.N. (1991). Targets of horizontal connections in  
804 macaque primary visual cortex. *J Comp Neurol* 305, 370-392.
- 805 Meinertzhagen, I.A., and O'Neil, S.D. (1991). Synaptic organization of columnar elements in the lamina  
806 of the wild type in *Drosophila melanogaster*. *J Comp Neurol* 305, 232-263.
- 807 Micheva, K.D., Wolman, D., Mensh, B.D., Pax, E., Buchanan, J., Smith, S.J., and Bock, D.D. (2016). A  
808 large fraction of neocortical myelin ensheathes axons of local inhibitory neurons. *eLife* 5, e15784.
- 809 Milyaev, N., Osumi-Sutherland, D., Reeve, S., Burton, N., Baldock, R.A., and Armstrong, J.D. (2012).  
810 The Virtual Fly Brain browser and query interface. *Bioinformatics* 28, 411-415.
- 811 Morgan, J.L., Berger, D.R., Wetzel, A.W., and Lichtman, J.W. (2016). The Fuzzy Logic of Network  
812 Connectivity in Mouse Visual Thalamus. *Cell* 165, 192-206.
- 813 Ofstad, T.A., Zuker, C.S., and Reiser, M.B. (2011). Visual place learning in *Drosophila melanogaster*.  
814 *Nature* 474, 204-207.
- 815 Ohyama, T., Schneider-Mizell, C.M., Fetter, R.D., Aleman, J.V., Franconville, R., Rivera-Alba, M.,  
816 Mensh, B.D., Branson, K.M., Simpson, J.H., Truman, J.W., *et al.* (2015). A multilevel multimodal circuit  
817 enhances action selection in *Drosophila*. *Nature* 520, 633-639.
- 818 Olsen, S.R., Bhandawat, V., and Wilson, R.I. (2007). Excitatory interactions between olfactory processing  
819 channels in the *Drosophila* antennal lobe. *Neuron* 54, 89-103.
- 820 Oswald, D., Felsenberg, J., Talbot, C.B., Das, G., Perisse, E., Huetteroth, W., and Waddell, S. (2015).  
821 Activity of defined mushroom body output neurons underlies learned olfactory behavior in *Drosophila*.  
822 *Neuron* 86, 417-427.
- 823 Oswald, D., and Waddell, S. (2015). Olfactory learning skews mushroom body output pathways to steer  
824 behavioral choice in *Drosophila*. *Curr Opin Neurobiol* 35, 178-184.
- 825 Pavlou, H.J., and Goodwin, S.F. (2013). Courtship behavior in *Drosophila melanogaster*: towards a  
826 'courtship connectome'. *Curr Opin Neurobiol* 23, 76-83.
- 827 Perin, R., Berger, T.K., and Markram, H. (2011). A synaptic organizing principle for cortical neuronal  
828 groups. *Proc Natl Acad Sci U S A* 108, 5419-5424.
- 829 Pfeiffer, B.D., Ngo, T.T., Hibbard, K.L., Murphy, C., Jenett, A., Truman, J.W., and Rubin, G.M. (2010).  
830 Refinement of tools for targeted gene expression in *Drosophila*. *Genetics* 186, 735-755.
- 831 Pietzsch, T., Saalfeld, S., Preibisch, S., and Tomancak, P. (2015). BigDataViewer: visualization and  
832 processing for large image data sets. *Nat Methods* 12, 481-483.
- 833 Potter, C.S., Pulokas, J., Smith, P., Suloway, C., and Carragher, B. (2004). Robotic grid loading system  
834 for a transmission electron microscope. *J Struct Biol* 146, 431-440.
- 835 Prokop, A., and Meinertzhagen, I.A. (2006). Development and structure of synaptic contacts in  
836 *Drosophila*. *Semin Cell Dev Biol* 17, 20-30.
- 837 Robinson, C., Price, J., Milkie, D., Torrens, O., Perlman, E., Zheng, Z., Fetter, R., and Bock, D. (2016).  
838 Automated Infrastructure for High-Throughput Acquisition of Serial Section TEM Image Volumes.  
839 *Microscopy and Microanalysis* 22, 1150-1151.
- 840 Roy, B., Singh, A.P., Shetty, C., Chaudhary, V., North, A., Landgraf, M., Vijayraghavan, K., and  
841 Rodrigues, V. (2007). Metamorphosis of an identified serotonergic neuron in the *Drosophila* olfactory  
842 system. *Neural Dev* 2, 20.
- 843 Ruskin, R.S., Yu, Z., and Grigorieff, N. (2013). Quantitative characterization of electron detectors for  
844 transmission electron microscopy. *J Struct Biol* 184, 385-393.
- 845 Ruta, V., Datta, S.R., Vasconcelos, M.L., Freeland, J., Looger, L.L., and Axel, R. (2010). A dimorphic  
846 pheromone circuit in *Drosophila* from sensory input to descending output. *Nature* 468, 686-690.
- 847 Ryan, K., Lu, Z., and Meinertzhagen, I.A. (2016). The CNS connectome of a tadpole larva of *Ciona*  
848 *intestinalis* (L.) highlights sidedness in the brain of a chordate sibling. *eLife* 5, e16962.



- 849 Saalfeld, S., Fetter, R., Cardona, A., and Tomancak, P. (2012). Elastic volume reconstruction from series  
850 of ultra-thin microscopy sections. *Nat Methods* 9, 717-720.
- 851 Sato, T. (1968). A modified method for lead staining of thin sections. *J Electron Microsc (Tokyo)* 17,  
852 158-159.
- 853 Schindelin, J., Arganda-Carreras, I., Frise, E., Kaynig, V., Longair, M., Pietzsch, T., Preibisch, S.,  
854 Rueden, C., Saalfeld, S., Schmid, B., *et al.* (2012). Fiji: an open-source platform for biological-image  
855 analysis. *Nat Methods* 9, 676-682.
- 856 Schlegel, P., Texada, M.J., Miroschnikow, A., Schoofs, A., Huckesfeld, S., Peters, M., Schneider-Mizell,  
857 C.M., Lacin, H., Li, F., Fetter, R.D., *et al.* (2016). Synaptic transmission parallels neuromodulation in a  
858 central food-intake circuit. *eLife* 5, e16799.
- 859 Schneider-Mizell, C.M., Gerhard, S., Longair, M., Kazimiers, T., Li, F., Zwart, M.F., Champion, A.,  
860 Midgley, F.M., Fetter, R.D., Saalfeld, S., *et al.* (2016). Quantitative neuroanatomy for connectomics in  
861 *Drosophila*. *eLife* 5, e12059.
- 862 Schurmann, F.W. (2016). Fine structure of synaptic sites and circuits in mushroom bodies of insect  
863 brains. *Arthropod Struct Dev* 45, 399-421.
- 864 Sejourne, J., Placais, P.Y., Aso, Y., Siwanowicz, I., Trannoy, S., Thoma, V., Tedjakumala, S.R., Rubin,  
865 G.M., Tchenio, P., Ito, K., *et al.* (2011). Mushroom body efferent neurons responsible for aversive  
866 olfactory memory retrieval in *Drosophila*. *Nat Neurosci* 14, 903-910.
- 867 Shepherd, G.M. (2016). Foundations of the neuron doctrine, 25th anniversary edition. edn (Oxford ; New  
868 York, Oxford University Press).
- 869 Silbering, A.F., Rytz, R., Grosjean, Y., Abuin, L., Ramdya, P., Jefferis, G.S., and Benton, R. (2011).  
870 Complementary function and integrated wiring of the evolutionarily distinct *Drosophila* olfactory  
871 subsystems. *J Neurosci* 31, 13357-13375.
- 872 Song, S., Sjöström, P.J., Reigl, M., Nelson, S., and Chklovskii, D.B. (2005). Highly nonrandom features  
873 of synaptic connectivity in local cortical circuits. *PLoS Biol* 3, e68.
- 874 Spindler, S.R., and Hartenstein, V. (2010). The *Drosophila* neural lineages: a model system to study brain  
875 development and circuitry. *Dev Genes Evol* 220, 1-10.
- 876 Sterling, P., and Laughlin, S. (2015). Principles of neural design (Cambridge, Massachusetts, The MIT  
877 Press).
- 878 Stocker, R.F., Lienhard, M.C., Borst, A., and Fischbach, K.F. (1990). Neuronal architecture of the  
879 antennal lobe in *Drosophila melanogaster*. *Cell Tissue Res* 262, 9-34.
- 880 Takemura, S., Aso, Y., Hige, T., Wong, A., Lu, Z., Xu, C.S., Plaza, S., Rivlin, P.K., Hess, H., Zhao, T., *et*  
881 *al.* (2017a). A connectome of a learning and memory center in the adult *Drosophila* brain. *eLife in press*.
- 882 Takemura, S.Y., Bharioke, A., Lu, Z., Nern, A., Vitaladevuni, S., Rivlin, P.K., Katz, W.T., Olbris, D.J.,  
883 Plaza, S.M., Winston, P., *et al.* (2013). A visual motion detection circuit suggested by *Drosophila*  
884 connectomics. *Nature* 500, 175-181.
- 885 Takemura, S.Y., Lu, Z., and Meinertzhagen, I.A. (2008). Synaptic circuits of the *Drosophila* optic lobe:  
886 the input terminals to the medulla. *J Comp Neurol* 509, 493-513.
- 887 Takemura, S.Y., Nern, A., Chklovskii, D.B., Scheffer, L.K., Rubin, G.M., and Meinertzhagen, I.A.  
888 (2017b). The comprehensive connectome of a neural substrate for 'ON' motion detection in *Drosophila*.  
889 *eLife* 6, e24394.
- 890 Takemura, S.Y., Xu, C.S., Lu, Z., Rivlin, P.K., Parag, T., Olbris, D.J., Plaza, S., Zhao, T., Katz, W.T.,  
891 Umayam, L., *et al.* (2015). Synaptic circuits and their variations within different columns in the visual  
892 system of *Drosophila*. *Proc Natl Acad Sci U S A* 112, 13711-13716.
- 893 Tanaka, N.K., Awasaki, T., Shimada, T., and Ito, K. (2004). Integration of chemosensory pathways in the  
894 *Drosophila* second-order olfactory centers. *Curr Biol* 14, 449-457.
- 895 Tanaka, N.K., Endo, K., and Ito, K. (2012). Organization of antennal lobe-associated neurons in adult  
896 *Drosophila melanogaster* brain. *J Comp Neurol* 520, 4067-4130.

- 897 Tanaka, N.K., Tanimoto, H., and Ito, K. (2008). Neuronal assemblies of the *Drosophila* mushroom body.  
898 *J Comp Neurol* 508, 711-755.
- 899 Tomassy, G.S., Berger, D.R., Chen, H.H., Kasthuri, N., Hayworth, K.J., Vercelli, A., Seung, H.S.,  
900 Lichtman, J.W., and Arlotta, P. (2014). Distinct profiles of myelin distribution along single axons of  
901 pyramidal neurons in the neocortex. *Science* 344, 319-324.
- 902 Tschida, K., and Bhandawat, V. (2015). Activity in descending dopaminergic neurons represents but is  
903 not required for leg movements in the fruit fly *Drosophila*. *Physiol Rep* 3.
- 904 Vogt, K., Aso, Y., Hige, T., Knapek, S., Ichinose, T., Friedrich, A.B., Turner, G.C., Rubin, G.M., and  
905 Tanimoto, H. (2016). Direct neural pathways convey distinct visual information to *Drosophila* mushroom  
906 bodies. *eLife* 5, e14009.
- 907 von Reyn, C.R., Breads, P., Peek, M.Y., Zheng, G.Z., Williamson, W.R., Yee, A.L., Leonardo, A., and  
908 Card, G.M. (2014). A spike-timing mechanism for action selection. *Nat Neurosci* 17, 962-970.
- 909 Wanner, A.A., Genoud, C., Masudi, T., Siksou, L., and Friedrich, R.W. (2016). Dense EM-based  
910 reconstruction of the interglomerular projectome in the zebrafish olfactory bulb. *Nat Neurosci* 19, 816-  
911 825.
- 912 Wertz, A., Trenholm, S., Yonehara, K., Hillier, D., Raics, Z., Leinweber, M., Szalay, G., Ghanem, A.,  
913 Keller, G., Rozsa, B., *et al.* (2015). Single-cell-initiated monosynaptic tracing reveals layer-specific  
914 cortical network modules. *Science* 349, 70-74.
- 915 Wetzel, A.W., Bakal, J., Dittrich, M., Hildebrand, D.G., Morgan, J.L., and Lichtman, J.W. (2016).  
916 Registering large volume serial-section electron microscopy image sets for neural circuit reconstruction  
917 using FFT signal whitening. arXiv preprint arXiv:161204787.
- 918 White, J.G., Southgate, E., Thomson, J.N., and Brenner, S. (1986). The structure of the nervous system of  
919 the nematode *Caenorhabditis elegans*. *Phil Trans Royal Soc London B* 314, 1-340.
- 920 Wilson, R.I. (2013). Early olfactory processing in *Drosophila*: mechanisms and principles. *Annu Rev*  
921 *Neurosci* 36, 217-241.
- 922 Wilson, R.I., Turner, G.C., and Laurent, G. (2004). Transformation of olfactory representations in the  
923 *Drosophila* antennal lobe. *Science* 303, 366-370.
- 924 Wolff, T., Iyer, N.A., and Rubin, G.M. (2015). Neuroarchitecture and neuroanatomy of the *Drosophila*  
925 central complex: A GAL4-based dissection of protocerebral bridge neurons and circuits. *J Comp Neurol*  
926 523, 997-1037.
- 927 Xu, C.S., Hayworth, K.J., Lu, Z., Grob, P., Hassan, A.M., García-Cerdán, J.G., Niyogi, K.K., Nogales, E.,  
928 Weinberg, R.J., and Hess, H.F. (2017). Enhanced FIB-SEM systems for large-volume 3D imaging. *eLife*  
929 6, e25916.
- 930 Yagi, R., Mabuchi, Y., Mizunami, M., and Tanaka, N.K. (2016). Convergence of multimodal sensory  
931 pathways to the mushroom body calyx in *Drosophila melanogaster*. *Sci Rep* 6, 29481.
- 932 Yasuyama, K., Meinertzhagen, I.A., and Schurmann, F.W. (2002). Synaptic organization of the  
933 mushroom body calyx in *Drosophila melanogaster*. *J Comp Neurol* 445, 211-226.
- 934 Yu, H.H., Kao, C.F., He, Y., Ding, P., Kao, J.C., and Lee, T. (2010). A complete developmental sequence  
935 of a *Drosophila* neuronal lineage as revealed by twin-spot MARCM. *PLoS Biol* 8.

936

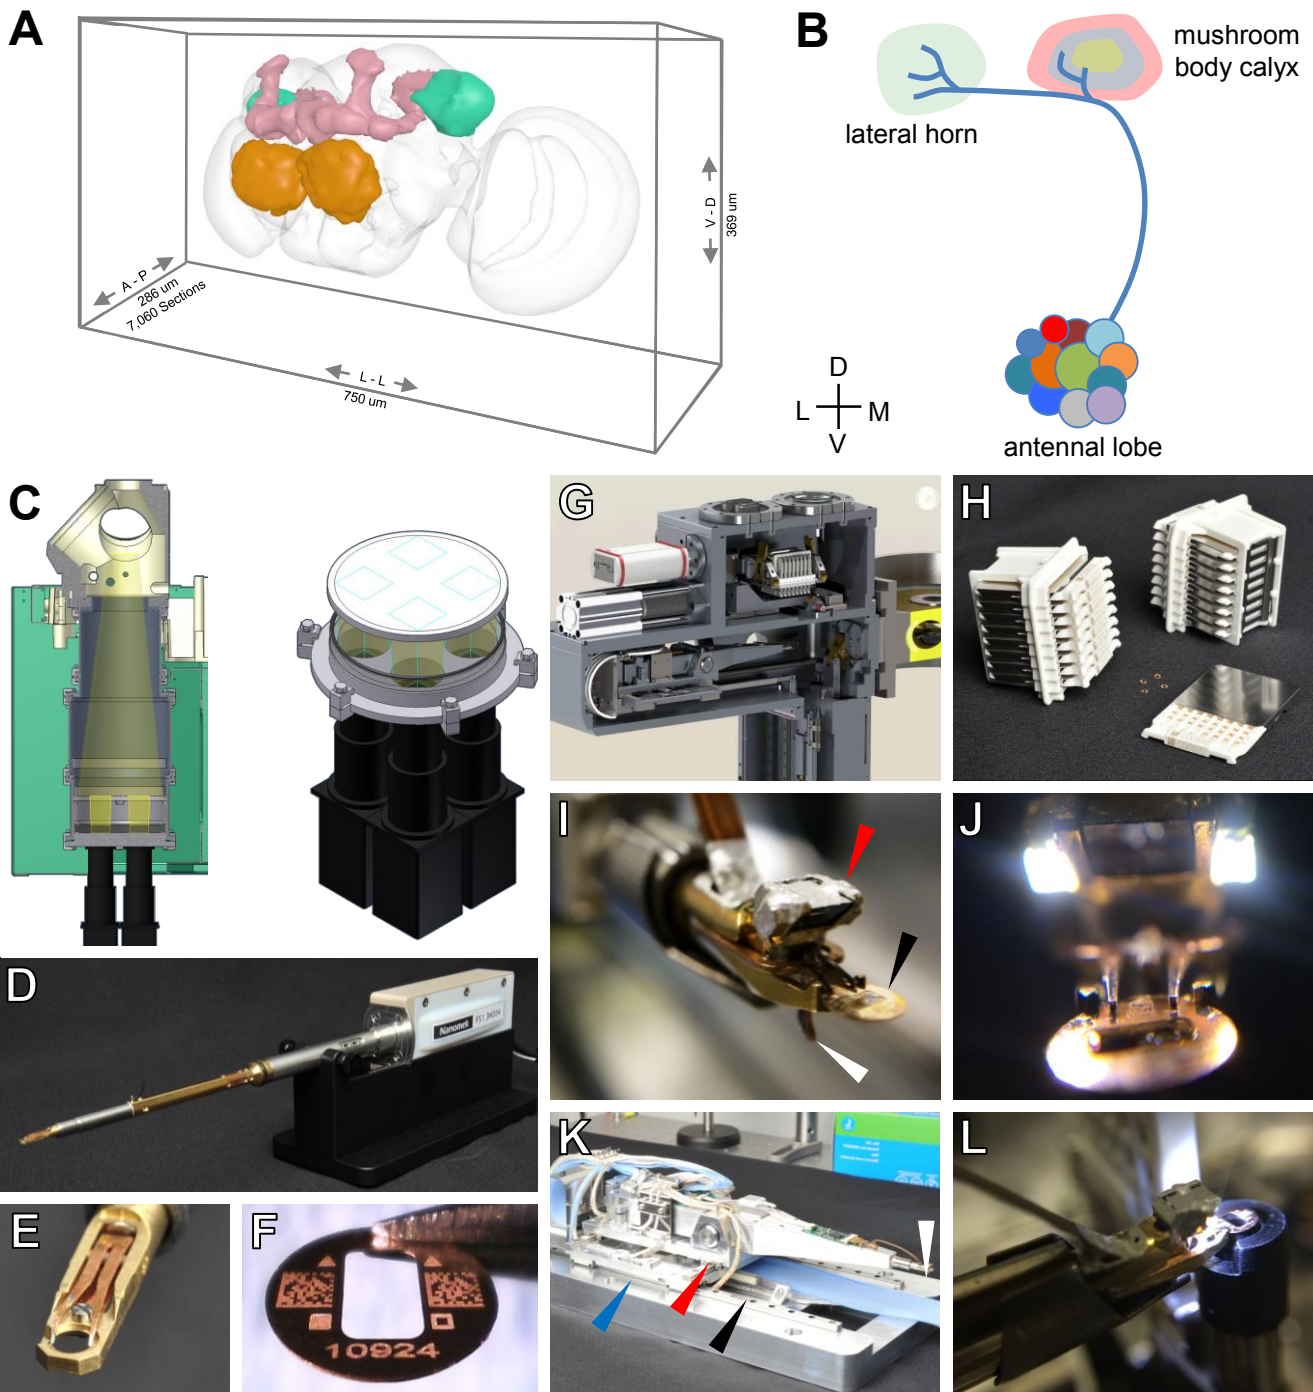

**Figure 1. Target Volume and EM Acquisition Infrastructure. See also Figure S1, Figure S2, Figure S3, Movie S1, Movie S2, Movie S3.**

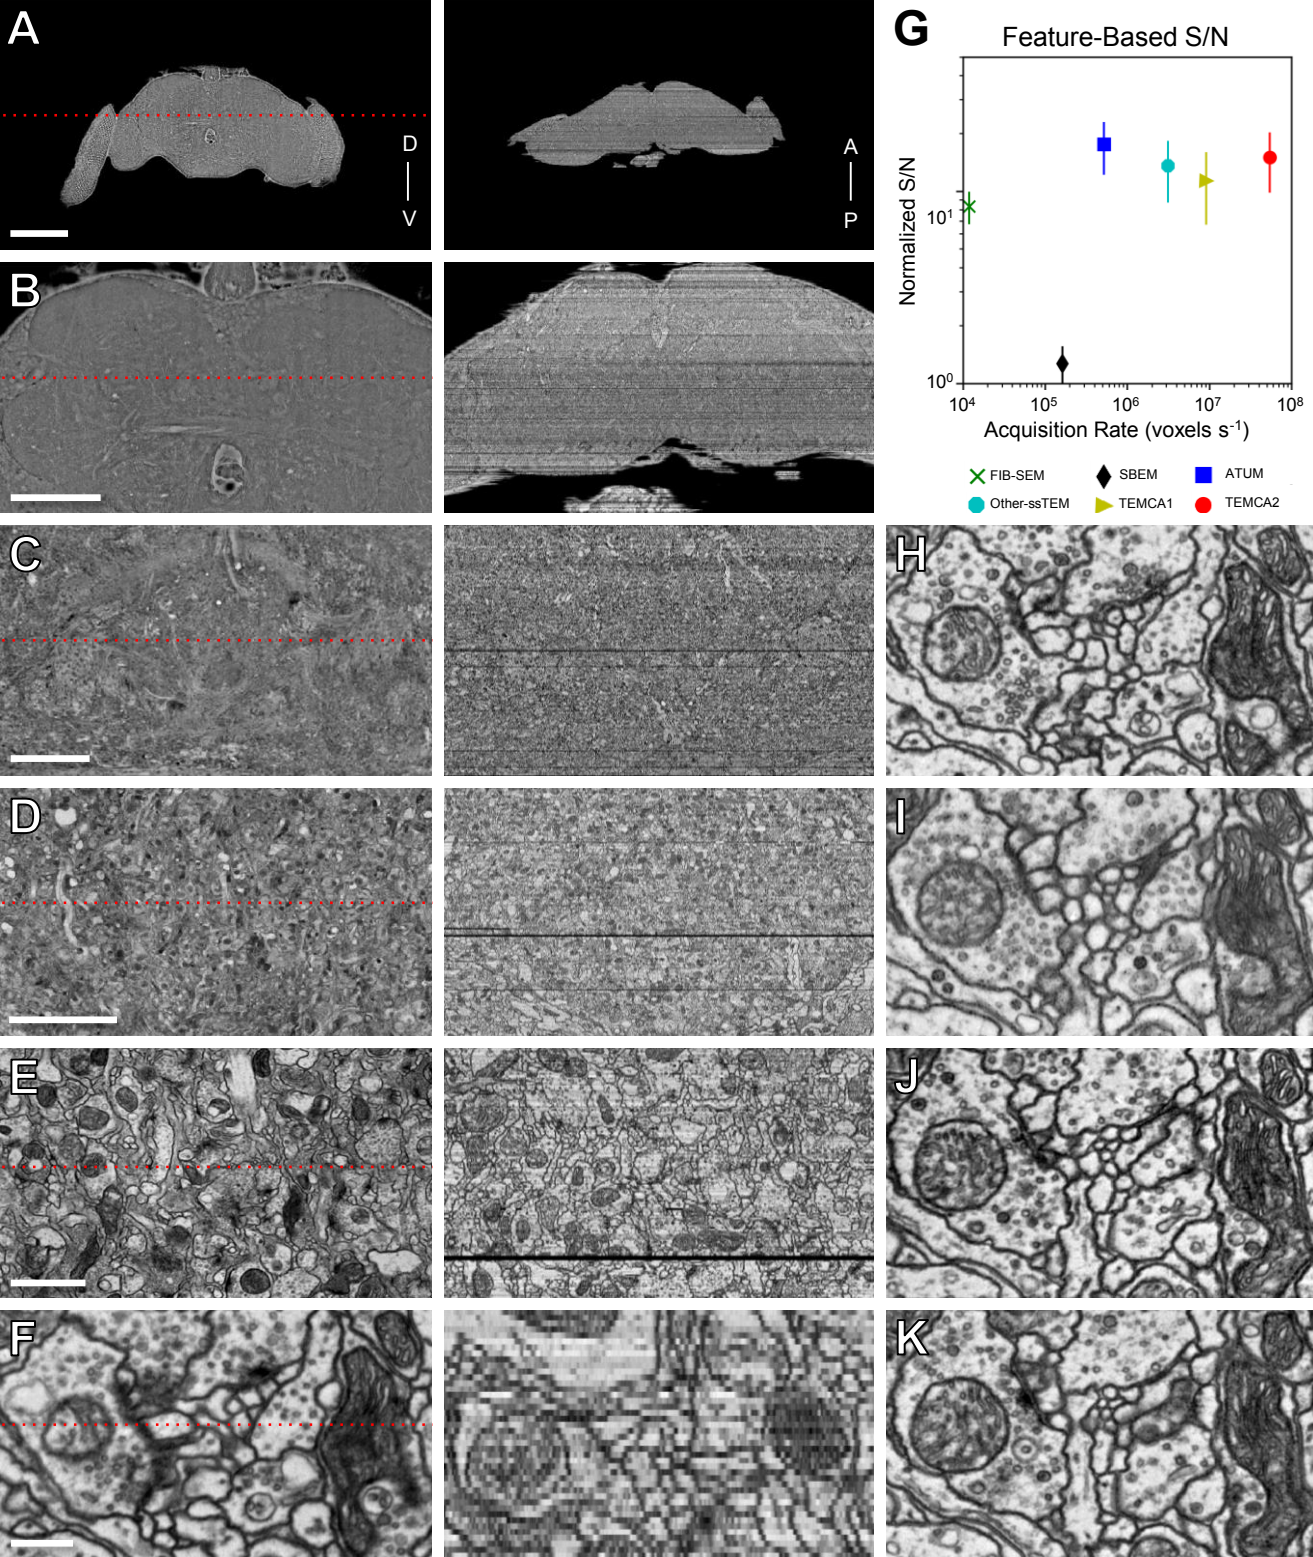

**Figure 2. Reconstructed Image Volume. See also Figure S4, Figure S5, Figure S6.**

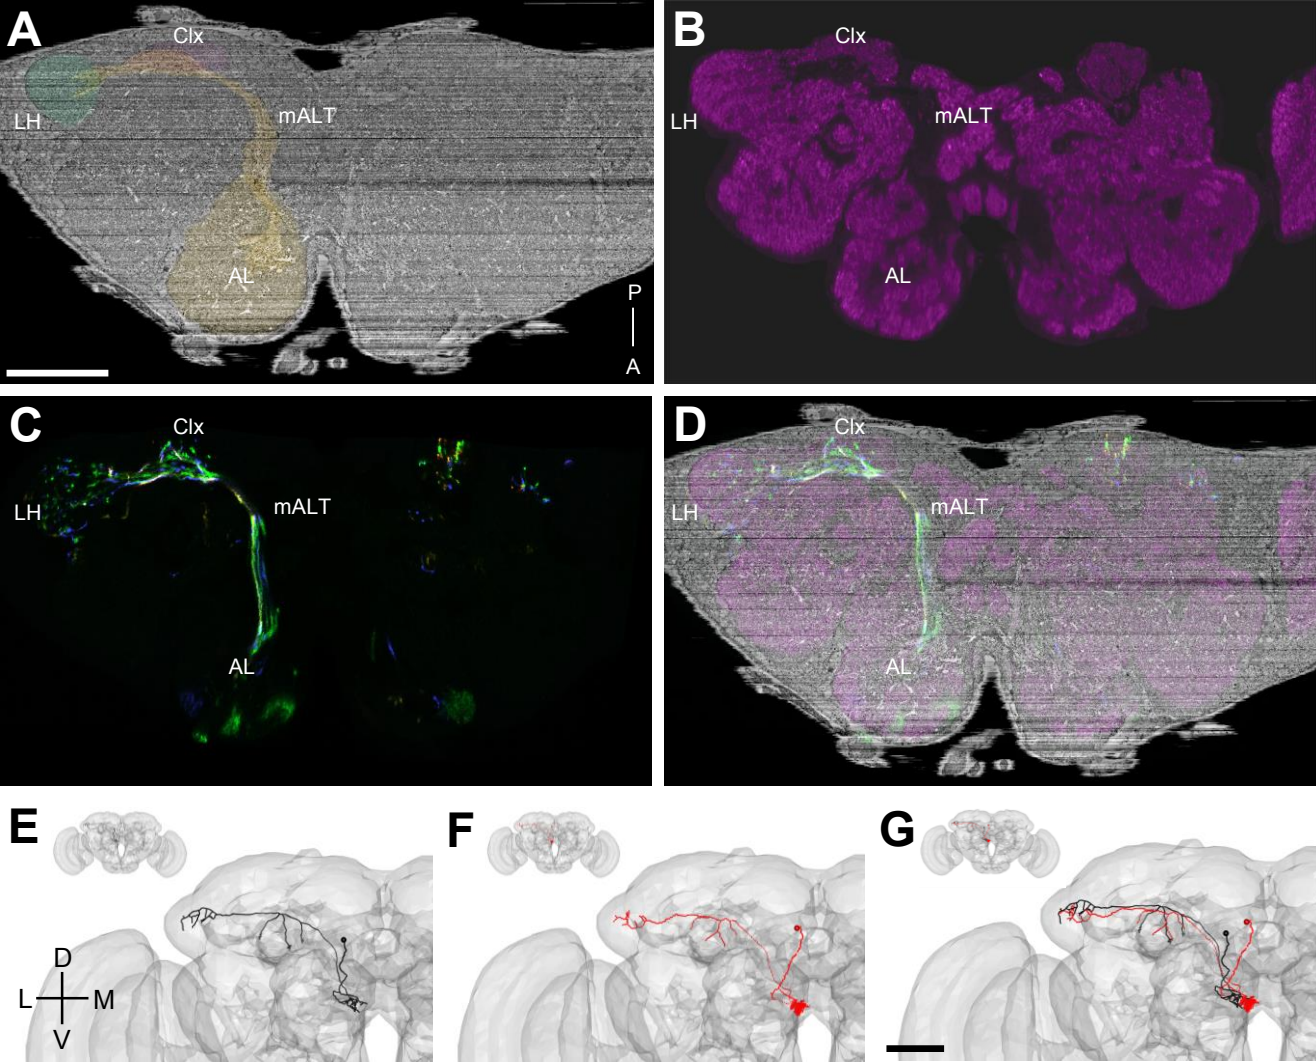

**Figure 3. Validation of Tracing by EM-LM Registration and NBLAST-based Geometry Matching.**



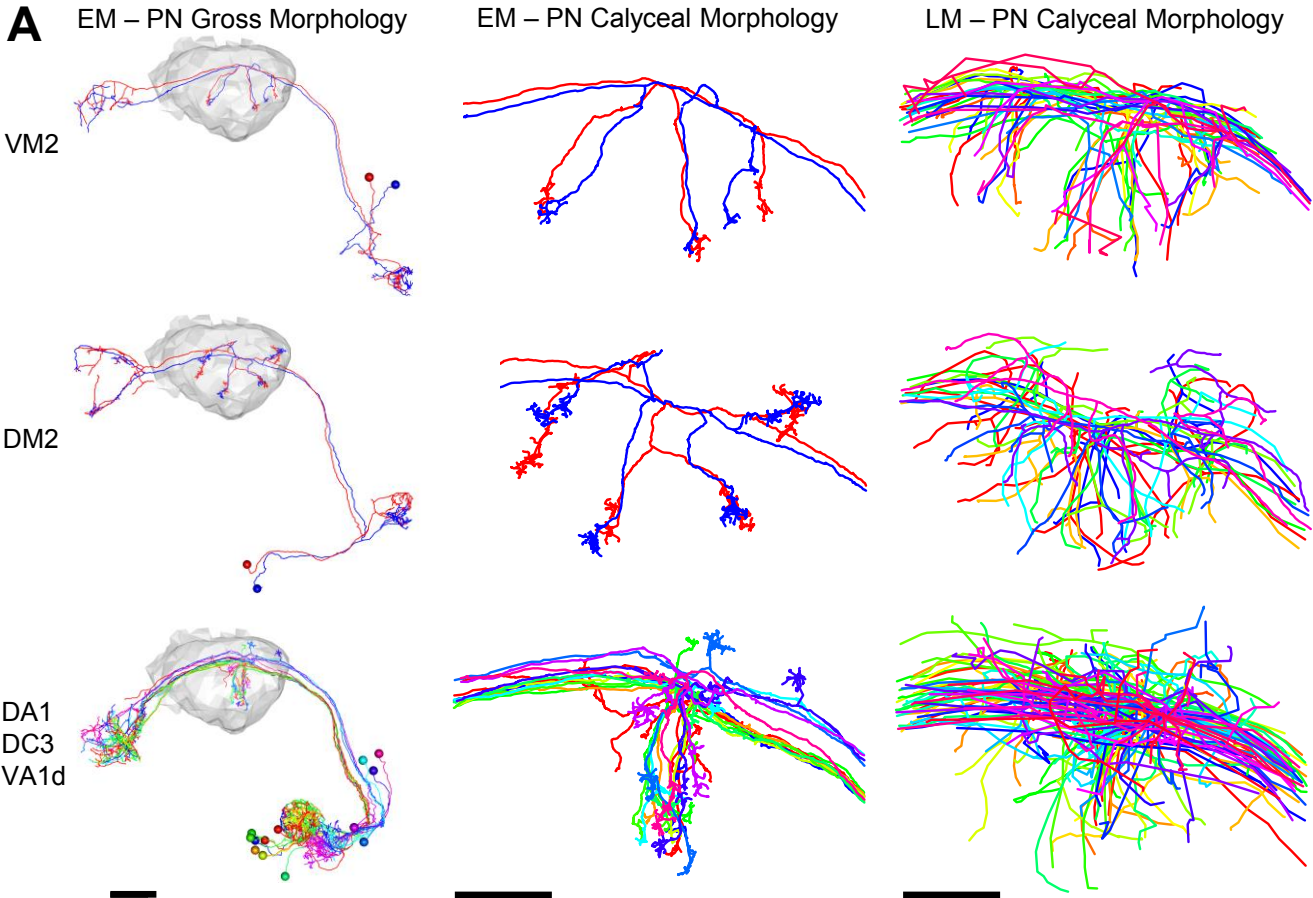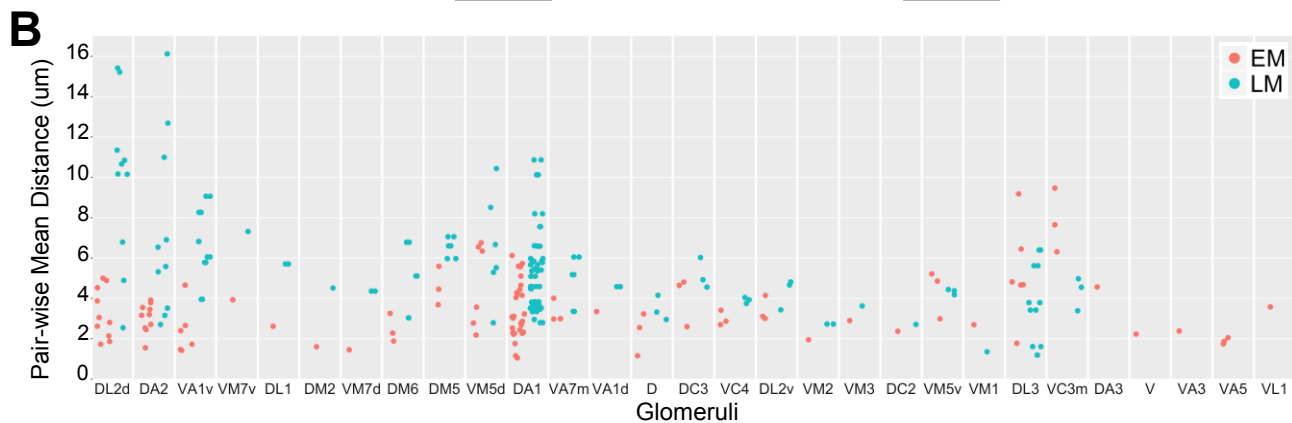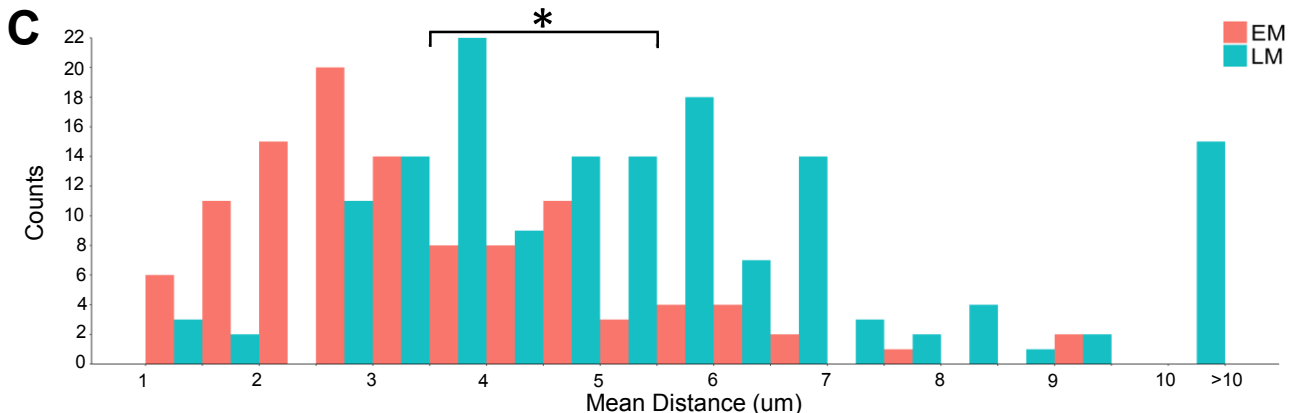

**Figure 5. PN Arbores in Calyx Cluster More Tightly Than Previously Seen with LM Across Individuals. See also Figure S7.**

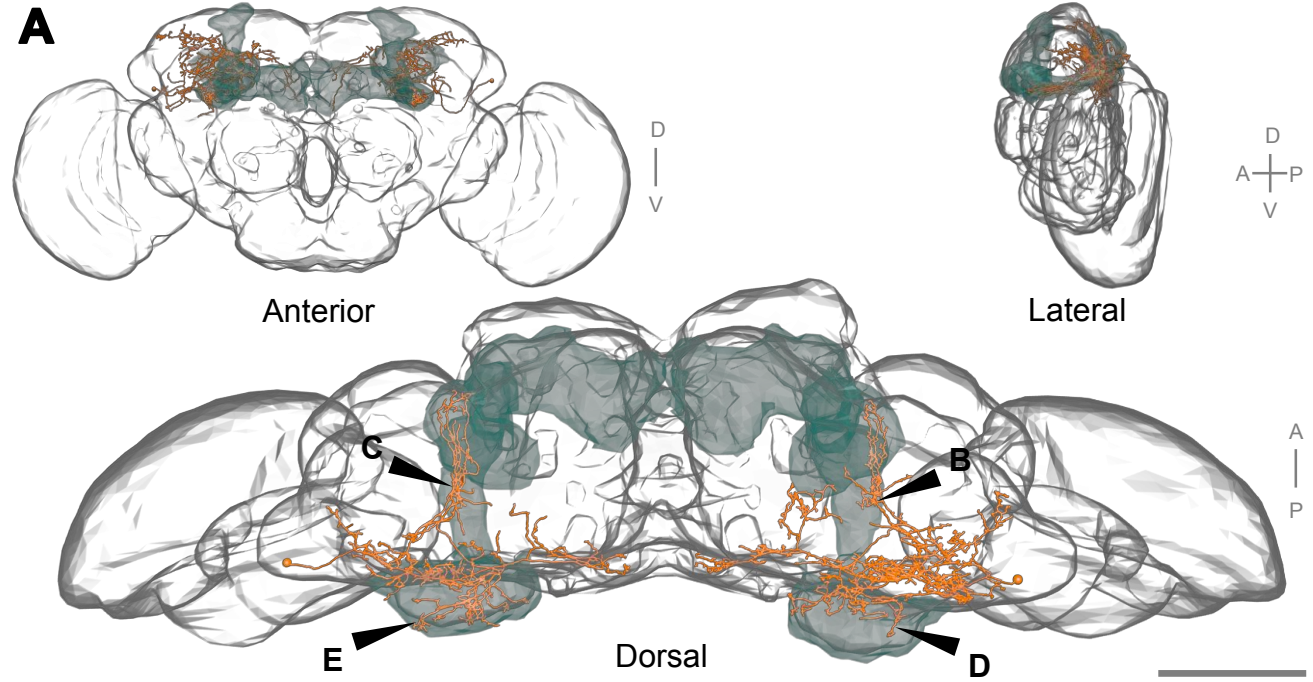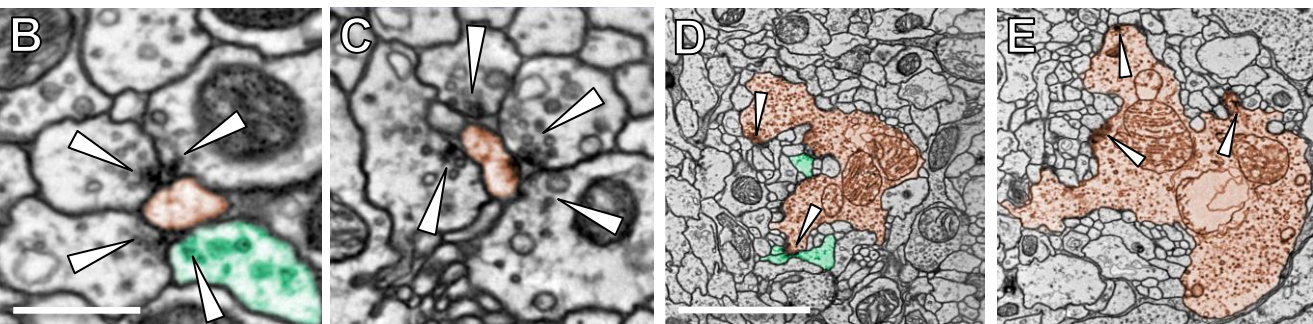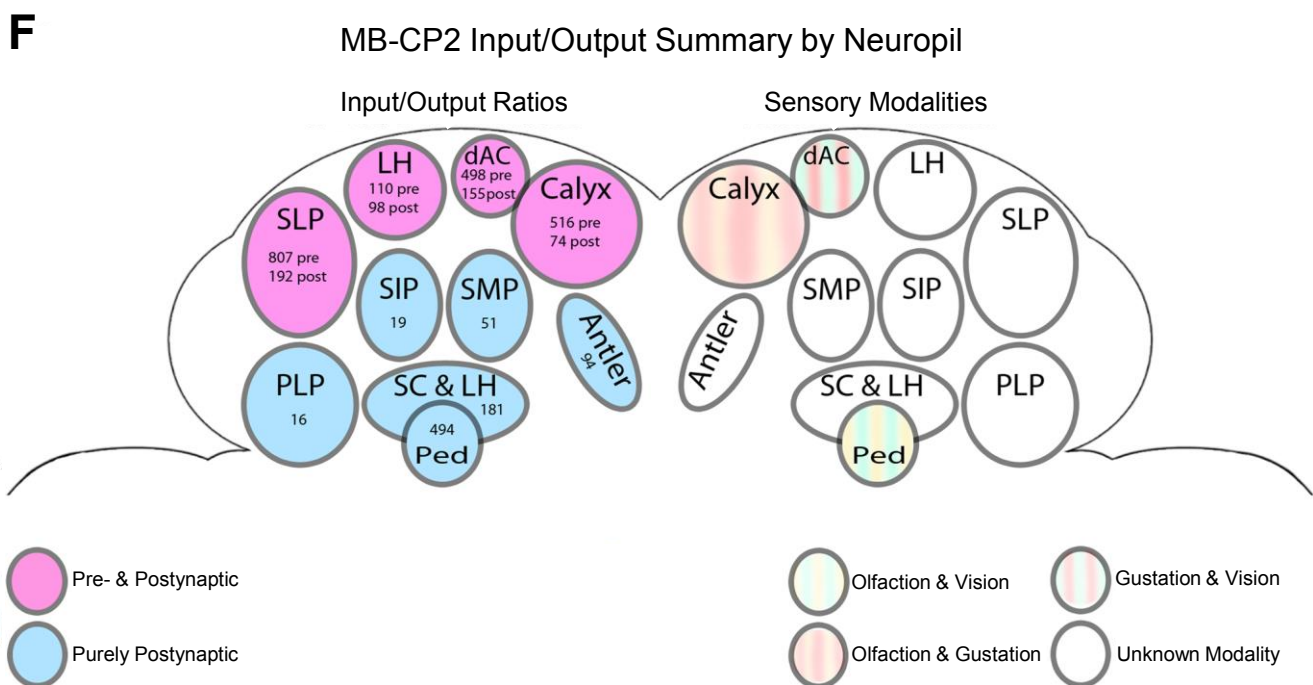

**Figure 6. MB-CP2, a New Cell Type Providing Microglomerular Input to KC Claws.**



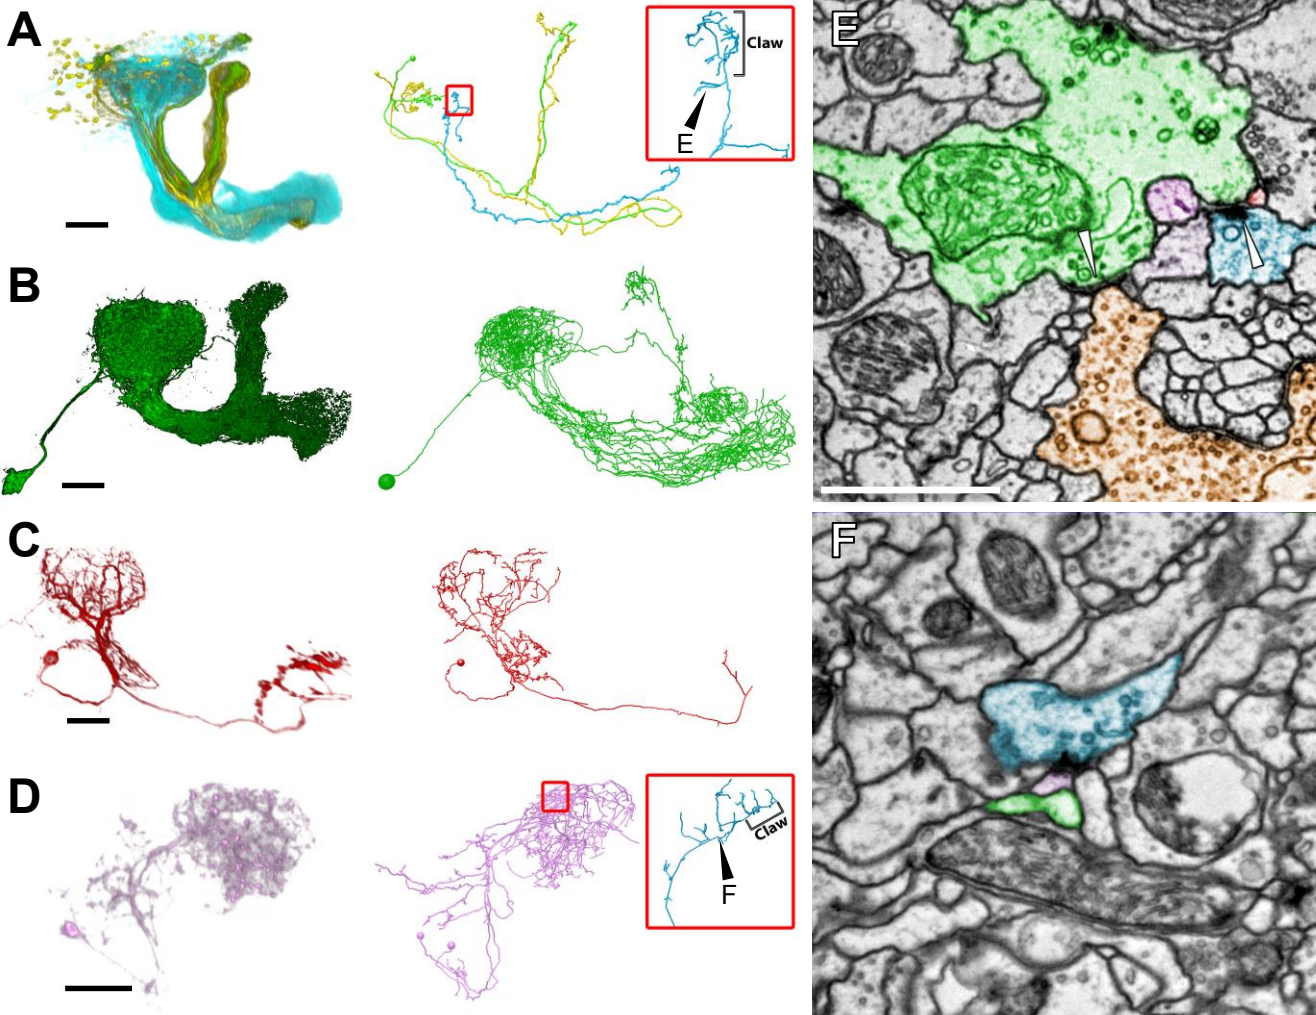

**Figure 7. KC Presynaptic Release Sites in the MB Main Calyx Mostly Target a Small Subset of Available Partners.**

## 1 STAR METHODS

2

### 3 CONTACT FOR REAGENT AND RESOURCE SHARING

4 Further information and requests for resources and reagents should be directed to and will be  
5 fulfilled by the Lead Contact, D.D.B. (bockd@janelia.hhmi.org).

6

### 7 EXPERIMENTAL MODEL AND SUBJECT DETAILS

8 Multiple brains of 7 day-old [iso]  $w^{1118}$  x [iso] Canton S G1 adult female flies were screened and  
9 one was picked for EM imaging.

10

### 11 METHOD DETAILS

#### 12 **Sample preparation**

13 Brains from 7 day-old adult [iso]  $w^{1118}$  x [iso] Canton S G1 flies were dissected in cold fly saline  
14 (Olsen et al., 2007). The dissected brains were fixed with 2% glutaraldehyde in 0.1M sodium  
15 cacodylate for 1 hour at 4°C, followed by 1 hour at room temperature (RT). Following aldehyde  
16 fixation, the brains were rinsed 6 x 5 min with sodium cacodylate buffer at RT, 3 x 10 min  
17 incubations in 0.02M 3-amino-1,2,4-triazole (A-TRA) (De Bruijn et al., 1984) (Sigma-Aldrich) in  
18 sodium cacodylate, the last on ice, followed by post-fixation with 1% OsO<sub>4</sub> in sodium cacodylate  
19 containing 0.1M A-TRA for 90 minutes on ice. The brains were then rinsed with cold sodium  
20 cacodylate buffer, allowed to warm to RT followed by deionized or Milli-Q water at RT before  
21 being stained *en bloc* with 7.5% uranyl acetate in water overnight at 4°C. Following *en bloc*  
22 staining, brains were rinsed with water at RT and then dehydrated in an ascending ethanol

23 series to 100% ethanol, followed by 100% propylene oxide. Samples were infiltrated with  
24 EmBed 812 resin using propylene oxide to resin ratios of 2:1 and 1:2 for 30 minutes each  
25 followed by two 1-hour long incubations in 100% resin and a third 100% resin incubation  
26 overnight. Finally, samples were flat embedded between Teflon-coated glass slides and allowed  
27 to harden for 24 hours at 65-70° C.

28 Samples were subsequently screened for whole-brain sectioning by X-ray tomography using an  
29 Xradia XRM-510 X-ray microscope (subsequently acquired by Zeiss). Samples without obvious  
30 surface defects due to dissection, or internal defects were re-embedded in silicon rubber molds  
31 for sectioning (Fig. S3).

### 32

### 33 **Sample supports, ultramicrotomy, and post-staining**

34 Custom bar-coded grids made from 100 µm thick copper beryllium with a 2 x 1mm slot, a unique  
35 serial identifier in human readable and 2-D barcode form and with fiducial markers were used to  
36 collect sections. Schematics and vendor information for the custom grids are available to non-  
37 profit research organizations upon request. Grids were prepared for picking up sections by first  
38 applying a silver/gold-color film of Pioloform (Pioloform FN, Ted Pella catalog #19244) followed  
39 by a ~8 nm layer of carbon. The Pioloform film was made thicker than normal to provide  
40 enhanced sample stability under the higher beam current necessary for rapid imaging (see  
41 below). To prepare the Pioloform film, a 600 µL aliquot of 2.05% Pioloform in dichloroethane  
42 was applied to an ethanol and hydrofluoric acid cleaned glass microscope slide (Gold Seal, Ted  
43 Pella catalog #260210) via spin coating using a Laurell WS400B-6NPP/Lite spin coater. After  
44 applying the Pioloform solution, the slide was spun for 1.4 seconds with a target speed of 8,000  
45 rpm and an acceleration index of 255. The film was released from the slide by scribing the  
46 edges of the slide with a diamond scribe and slowly submerging the glass slide at a shallow

47 angle into a large dish of water. The film remains floating on the surface of the water and  
48 cleaned grids were then carefully placed, bar code side down, onto the film. The film and grids  
49 were subsequently picked up from above on a 1 x 3 inch slotted and anodized aluminum slide.  
50 The anodized surface also provided a stable and reusable surface from which the grids could be  
51 cut from the surrounding support film using a heated tungsten filament. Grids were loaded onto  
52 custom 203-place stainless steel plates for carbon coating.

53 Carbon coating was carried out in a Denton Explorer 14 high vacuum evaporator equipped with  
54 oil diffusion pump, liquid nitrogen cold trap, and a film thickness monitor using carbon rods (Ted  
55 Pella catalog #62-132). The carbon rods were de-gassed at sub-evaporation currents (8-14  
56 amps) prior to and immediately following sample loading. The 203-place plate was held at a 90-  
57 degree angle to the source at a distance of 10 cm during evaporation. Following a vacuum  
58 recovery period, the carbon rods were de-gassed and warmed at sub- to near-evaporation  
59 currents (8-16 amps). To avoid overheating the films, carbon was evaporated in a series of  
60 cycles (in our hands, each cycle was stopped when the deposition rate reached  $-0.5 \text{ \AA}/\text{sec}$  and  
61 resumed when the deposition rate returned to  $0 \text{ \AA}/\text{sec}$ ). Vacuum levels prior to evaporation were  
62  $\sim 5 \times 10^{-8}$  torr or better. Evaporation was carried out at  $22 \pm 1$  amps. Carbon evaporation was  
63 halted at an indicated thickness of 70 to 80  $\text{ \AA}$  and final thickness assessed after a 5 minute cool  
64 down period. Successfully prepared grid films remained perfectly flat when held within  $\sim 1$  mm of  
65 a water surface (Figure S3F) whereas unsuccessful films displayed a relaxation of the film  
66 tension when held close to water (Figure S3E). Grid batches in which coatings tested did not  
67 remain flat were rejected.

68 Serial sections of the brain were cut with a Leica UC-6 ultramicrotome at a thickness of 35-40  
69 nm, with periodic retrimming of the block face. Total sectioning time was  $\sim 3$  weeks. Typically, 3

70 serial sections were collected on each of the ~2,400 custom bar-coded grids needed to collect  
71 the 7000+ sections necessary to encompass the whole brain.

72 Following sectioning, grids were stained in 3% aqueous uranyl acetate for 20 minutes followed  
73 by Sato's lead (Sato, 1968) for 5 minutes, with ddH<sub>2</sub>O washes after each staining step. To  
74 facilitate the staining of ~2,400 grids, a custom Plexiglass staining device with slots to hold 100  
75 grids at a time, loosely based on the Hiraoka (1972) device, was used.

76

## 77 **Electron Microscopy**

78 Two FEI Tecnai Spirit BioTWIN TEMs were used to image the whole fly brain series. The first, a  
79 TEMCA2 system (Figure 1C, Figure S2A), was equipped with a custom single-axis Fast Stage,  
80 vacuum extension, scintillator (5 µm Mylar on a support ring 9 <sup>5</sup>/<sub>8</sub> inches in diameter, coated with  
81 10 mg fine-grained P43/cm<sup>2</sup>; Grant Scientific), and four Fairchild SciMOS 2051 Model F2 5.5  
82 megapixel cameras (2560 x 2160 pixel sensor size) configured in a 2 x 2 array. The second  
83 TEM was equipped with an Autoloader (Figure 1G, S2E), a custom scintillator (6 mg fine-grain  
84 P43/cm<sup>2</sup>; Grant Scientific), and a single Fairchild SciMOS camera. In both systems, 4:1  
85 minifying C-lenses (AMT) were mounted on the SciMOS cameras using custom lens mounts  
86 (AMT). These systems were previously described in abstract form (Robinson et al., 2016).  
87 Schematics and model files for the Fast Stage and Autoloader are available to non-profit  
88 research organizations upon request.

89 The Fast Stage has a single high-speed axis of motion, and is designed to interface an FEI  
90 CompuStage goniometer (Figure S2B), which provides the other degrees of freedom necessary  
91 to position a sample in the TEM. The sample holder is connected to a drive rod, which passes  
92 through a custom rolling-element bearing, vacuum sealing bellows, and a rolling-element

93 damper (Figure 1D, S2B). The drive rod is connected to a slide-mounted encoder which  
94 provides nanometer-resolution positional feedback. It is moved linearly by a precision piezo  
95 motor (Physik Instrument cat N301K151). The custom rolling-element tip bearing provides rigid  
96 lateral support to the drive rod within the outer drive rod tube, while minimizing axial friction  
97 required to move the driven mass of the system. The custom rolling-element dampers kill  
98 vibrations of the drive rod induced by the pulsed motion of the piezo motor during moves.  
99 Without these dampers, the drive rod would vibrate for hundreds of milliseconds under the  
100 pulsed motion of a move, rendering the system unusable. With the dampers, 8-24 micron moves  
101 are reliably achieved where all vibrations are damped to less than 5 nanometers in less than 50  
102 milliseconds (Figure S2C). The miniature vacuum bellows isolates the specimen-holding region  
103 of the device from atmospheric pressure of the operating environment. By locating the vacuum  
104 bellows just behind the O-ring in an FEI style holder, the volume needed to be evacuated after  
105 sample insertion is minimized, allowing samples to be exchanged in the same amount of time as  
106 a conventional holder.

107 The Autoloader GPS (Figures 1I, S2E-F) is a complete replacement for the FEI CompuStage  
108 goniometer and specimen holder, and provides all required degrees of freedom to position a  
109 specimen within the TEM column. High-speed single-axis motion is supported by the same drive  
110 mechanisms used in the Fast Stage. Other axes of motion are provided by piezo-driven and  
111 brush motors (Figure S2). The rotational angle of the sample can be changed by placing the  
112 sample grid on a rotary pre-aligner, rotating to the desired angle, and picking the sample back  
113 up again in the gripper (Movie S3). The machine vision system enabling automated handling of  
114 samples in the Autoloader recorded continuous video while operating, providing visual  
115 confirmation of proper operation and an invaluable debugging tool in the event of handling  
116 errors. To enable a continuous video stream as well as high dynamic range images suitable for

117 image processing, the acquisition stream automatically adjusts image gain and exposure time  
118 for the required regime. These changes can be seen in Movie S3.

119 Image acquisition on the TEMCA2 system was performed at an indicated scope magnification of  
120 2900x, while the single camera Autoloader equipped system operated at 4800x indicated  
121 magnification. The longer vacuum extension of the TEMCA2 system enlarged the projected  
122 image by  $\sim 1.7x$ , resulting in  $\sim 4$  nm/pixel for both systems.

123 Software control of the TEMCA2 and Autoloader systems was written in LabVIEW (National  
124 Instruments). Wrapper software to interface the Fairchild SciMOS cameras with LabVIEW was  
125 written in C. Hardware triggers were used to interleave stage motion with camera frame buffer  
126 acquisition. Each camera was read out by a dedicated analysis workstation (Dell), or 'acquisition  
127 node,' connected via 10 Gb Ethernet to a central 'control node' which managed hardware  
128 triggering, stage control, region of interest (ROI) specification, mosaic preview, and user  
129 interface for hardware control. Low-latency TEM hardware control (such as beam blanking,  
130 valve operation, CompuStage control, magnification and focus adjustments, and electron beam  
131 diameter) was achieved by direct communication between LabVIEW software and the FEI  
132 dynamic-link library (DLL) files supporting the FEI Tecnai scripting environment, through the  
133 DLLs' component object model (COM) interfaces.

134 Acquisition nodes measured translational drift between successive image frames in near real-  
135 time, using the NI Image analysis package (National Instruments). If drift exceeded a user-  
136 specified threshold, they were discarded and additional frames were acquired until the  
137 requested number was acquired or until a user-specified timeout was exceeded. Each  
138 acquisition node allocated three tiers of memory buffer to the image processing pipeline, to  
139 allow real-time acquisition to continue unimpeded, regardless of variations in CPU load,  
140 operating system memory management, disk performance, or network throughput. In the first

141 tier, raw image frames were processed for drift estimation. In the second tier, sets of image  
142 frames were translated (to correct for small translations by the sample stage), summed,  
143 normalized to a background image of the scintillator, and histogram-adjusted. In the third tier,  
144 the summed and normalized images were written to disk. As images exited each of these  
145 buffers, memory was recycled so new images could be acquired and processed. Due to the  
146 rapid rate of data acquisition, multiple storage servers, each connected via 10 Gb Ethernet,  
147 were written to in round-robin fashion. Each server contained two RAID 6 volumes, and up to  
148 four servers were deployed in parallel during data acquisition. If a RAID 6 volume or a server  
149 went offline, images were written to other volumes in the available set. SSDs were installed in  
150 each acquisition node to allow an acquisition to complete in the event of total network failure  
151 during acquisition. This infrastructure was capable of supporting sustained output from the two  
152 TEMCAs and the Autoloader. No data were lost due to storage or network issues during  
153 acquisition of the whole-brain EM volume.

154 Autoloader control software was substantially similar to the TEMCA2 software except that it also  
155 controlled the Autoloader hardware. Autoloader-specific functionality included machine-vision-  
156 guided pick-and-place and pre-alignment of sample grids, automatic focus of the TEM, and  
157 region of interest relocation across grid picks. We also developed a user interface to let the  
158 operator define the sequence of imaging steps to be performed as well as accompanying  
159 microscope parameters for each step. All software for control of the SciMOS cameras, TEMCA2  
160 systems, and the Autoloader is available to non-profit research organizations upon request.

161 For TEMCA2-imaged samples, a 16.2 nm/pixel pre-bake mosaic was acquired at 60 ms  
162 exposure time to pre-irradiate the sample and reduce specimen warping and shrinkage under  
163 high dose acquisition. The 16.2 nm/pixel mosaics were used to specify ROIs for 4 nm/pixel  
164 mosaic acquisition. The 4 nm/pixel mosaics were acquired at 35 ms exposure times. Frames



165 were analyzed for drift in real time and 4 frames with less than 16 nm frame-to-frame drift were  
166 translated into pixel-level alignment, summed, intensity corrected, and saved. Mosaics were  
167 acquired in a boustrophedonic fashion column by column (figure S2D) running down the long  
168 axis of the 2 x 1 mm slot across the three sections such that use of the fast, piezo-driven stage  
169 axis was maximized during acquisition while slower CompuStage moves were minimized. Due  
170 to non-overlapping fields of view on TEMCA2, a two-step approach was utilized where a small  
171 stage displacement (~1900 pixels, or 7.6  $\mu\text{m}$ ) filled the gap between the fields of view was  
172 followed by a large displacement (~5500 pixels, or 22.0  $\mu\text{m}$ ) moving to a completely fresh field  
173 of view; this schema was utilized on both x and y axes with x and y steps being slightly different  
174 (5550/1950 and 5450/1850, respectively, big step/small step, in pixels). Accurate calibration of  
175 pixels per micron is essential for converting pixel distances into physical distances and allows  
176 for pixel distances to be kept constant while the conversion factor was varied depending on the  
177 indicated magnification of the microscope.

178 Samples are organized in the Autoloader as follows. The Autoloader holds a magazine (Figure  
179 1L) containing 8 cassettes. Each cassette holds 64 sample grids (Figure 1F) for a total  
180 magazine capacity of 512 sample grids. The Autoloader affords random access to the individual  
181 grids, which can be retrieved, oriented, loaded into the TEM, imaged, and reliably returned to  
182 their proper address in the Autoloader. The Autoloader imaged samples in a two-pass routine  
183 where grids were returned to cassettes between acquiring pre-bake mosaics and 4 nm/pixel  
184 mosaics. The interval between imaging steps allows for the designation of ROIs for 4 nm/pixel  
185 imaging. To ensure that ROIs were accurately acquired, the Autoloader found the center of the  
186 grid slot every time a grid was loaded into the TEM column. This center point was used to align  
187 ROIs and correct for small differences in grid orientation resulting from the two-pass workflow.

188 The Autoloader system employed a single point autofocus routine at the center of each section  
189 to determine focus for each ROI acquired.

190 High-speed generation of mosaics necessitates high electron dose rate at the sample (typically  
191 ~180x the dose rate required for a 2 second exposure on Kodak 4489 film at 120 kV) to saturate  
192 the sensor wells within the short interval (35 ms in our case, vs. ~1-2s typical integration time).

193 Pre-irradiation images of the grids were used to subdivide the samples into three ROI classes:  
194 (1) Included areas sufficiently free of substrate damage and contaminants to sustain imaging at  
195 the highest beam currents; (2) Excluded areas to be masked out of the data set entirely; (3)  
196 Borderline areas of usable but lower quality to be imaged at one tenth intensity.

197 Four sections (not consecutive) were lost during sectioning; and two grids, each containing 3  
198 serial sections (3595-3597 and 6883-6885), were found to have ruptured support films after  
199 post-sectioning staining but prior to EM imaging. Sections with debris or cracks in the support  
200 film were imaged in two rounds: a high-dose, high-throughput round, excluding potentially fragile  
201 areas of a section; and a subsequent low-dose, slow exposure round, of the fragile region only.  
202 Twenty-seven sections in 9 grids ruptured toward the end of second round imaging when the  
203 low-dose electron beam hit artifacts. However, a majority (if not the entirety) of the section was  
204 already successfully imaged. In this case, although the sections were successfully imaged, the  
205 support film rupture precludes future re-imaging of these 27 sections.

206

## 207 **Volume Reconstruction Pipeline**

### 208 *Overview*

209 For each imaging acquisition system used, small step size calibration mosaics and a small  
210 reference mosaic in the same area on three reference grids were acquired. The calibration

211 mosaics were used to calculate a correction for non-affine lens distortion for each camera in that  
212 particular acquisition system (Kaynig et al., 2010). The reference mosaics were then used to  
213 calculate the remaining affine distortion of each camera relative to all other cameras and  
214 acquisition systems, resulting in a global camera calibration model across all cameras and  
215 imaging systems involved. In the event that the imaging system configuration was modified (e.g.  
216 for camera refocusing or scintillator replacement), a new calibration mosaic was acquired, and  
217 new camera calibration models were calculated. Relational and non-relational databases were  
218 used to track image metadata and computed image transformations throughout the volume  
219 reconstruction process, and raw image data were processed using a custom-developed, highly  
220 scalable and efficient cluster-backed linear solver to stitch all section mosaics independently  
221 (Methods).

222 The majority of low-dose/high-dose (see Electron Microscopy) sections are acquired during a  
223 single session, without the sample being removed from the microscope. Therefore, a reliable  
224 first guess for relative positions of these layer patches is usually provided. Generally, low-  
225 dose/high-dose sections are registered in a process that takes advantage of components of the  
226 general registration pipeline above. Montages of individual acquisitions are generated and their  
227 point-matches stored. All montages sharing the same z-value (i.e. the low-dose/high-dose group  
228 of sections), together with reference neighbor “sandwich” sections are treated as a set of  
229 sections that are roughly aligned to each other as if they were all separate sections. This rough  
230 alignment is used to determine potential overlap of low-dose and high-dose areas. Tile-pairs are  
231 determined and their point-matches calculated and stored. Finally, all point-matches (within-  
232 layer, across low-dose/high-dose patches, and cross-layer to neighboring reference sections)  
233 are used to solve a linear system to determine transformation parameters for a seamless  
234 registration.

235 *Migration of data*

236 As noted above, camera images were written in a round-robin fashion across multiple high-  
237 speed RAID 6 storage servers. Mosaics selected for inclusion into the final reconstructed  
238 volume were copied to a centrally managed distributed file system at Janelia Research Campus  
239 offering high-throughput connectivity to the computational cluster as well as off-site backups. All  
240 images were checksum verified after file copy operations.

241

242 *Stack management & relational database*

243 We created a relational database for storing and querying metadata associated with the  
244 thousands of image mosaics and millions of acquired images. We use SQL Server 2012 for our  
245 production system and SQLite for development. Metadata required for downstream processing  
246 included: paths to image data (with checksums), stage coordinates, ROIs associated with  
247 nominal section numbers, ordering of sections and microscope configurations with associated  
248 calibrations. The input for the alignment process – a stack – can be generated with a single SQL  
249 query joining the majority of tables. The result is a list of images with their layer (z), stage  
250 coordinates (x,y), and camera configuration (for associating the correct lens correction model).

251 The alignment process of the approximately 21 million images and associated projection of  
252 already-traced skeletons between alignment iterations is computationally expensive. To manage  
253 this we developed the Renderer toolkit (<https://github.com/saalfeldlab/renderer>), a set of  
254 image stack management tools and RESTful HTTP web services now in use in multiple  
255 additional projects. Renderer was designed in order to handle large scale (hundreds of millions)  
256 of individual records efficiently while supporting large-scale concurrent access for the  
257 stitching, section order analysis, skeleton mapping and intensity correction. Briefly, Renderer is  
258 able to quickly materialize (i.e. render) modified images for a set of transformation parameters  
259 using the mpicbg transformation library (<https://github.com/axtimwalde/mpicbg>). The use of the

260 mpicbg library allows simple conversion between the Renderer database (a MongoDB instance)  
261 and TrakEM2 projects. For large scale rendering and coordinate mapping, we used Java stand-  
262 alone and Spark framework clients to allow it to be processed in bulk on a cluster.

263

### 264 *Calibration mosaics*

265 In our TEMCA2 system, we operate with a wider field of view than a conventional TEM which  
266 comes at the cost of individual images showing significant non-linear distortion. This distortion  
267 is the accumulation of camera lens-distortion, variation in camera mounting, and warping in the  
268 electron beam path. We compensated for this distortion using the lens-correction method  
269 available in TrakEM2 (Kaynig et al., 2010) followed by affine normalization between all distortion  
270 models. For each individual camera, we imaged a 3 x 3 mosaic of redundantly (60%)  
271 overlapping tiles of a neuropil region in one of our sample grids. This mosaic was then used to  
272 estimate a non-linear distortion correction model in TrakEM2. To compensate for the remaining  
273 affine distortion (scale and shear) of each of these camera models, we imaged a large reference  
274 montage in the neuropil region of three reference sections (to account for accidental section  
275 loss) that we then jointly aligned with TrakEM2. This way, we obtained a globally consistent  
276 camera calibration model for each individual camera. We repeated the calibration step each  
277 time an imaging system was adjusted, resulting in a set of 15 independent camera calibration  
278 models for the complete *Drosophila* brain.

279

### 280 *Alignment*

281 The image acquisition process provides partially overlapping images that are assumed to cover  
282 the entire region of interest. Image mosaics need to be stitched within each z-section plane, as  
283 well as aligned across z to produce a seamless volume. Details of the methods and  
284 documentation of actively used code are available at

285 [\[https://github.com/billkarsh/Alignment\\_Projects/blob/master/00\\_DOC/method\\_overview.md](https://github.com/billkarsh/Alignment_Projects/blob/master/00_DOC/method_overview.md);[http://github.com/billkarsh/Alignment\\_Projects/blob/master/00\\_DOC/ptest\\_reference.md](http://github.com/billkarsh/Alignment_Projects/blob/master/00_DOC/ptest_reference.md)] and  
286  
287 [\[https://github.com/khaledkhairy/EM\\_aligner\]](https://github.com/khaledkhairy/EM_aligner).

288 Here we provide a summary. The reconstruction process consists of two steps. (1) Matching of  
289 putatively identical content between pairs of overlapping images; those matched point-pairs are  
290 stored in a table. (2) Using point-pairs to solve for linear (affine) transforms that map local image  
291 coordinates to a common stitched volume coordinate system.

292

### 293 *Matching point-pairs within mosaics*

294 Matching is first done within each of the serial sample sections (z-layers), considered  
295 independently of any other sections. Two neighboring images would match essentially perfectly  
296 except for very slight differential beam heating.

297 TEM stage coordinates provide useful guesses about which pairs of images have overlaps  
298 worth characterizing, as well as the expected relative transform between pair members that we  
299 can use to constrain content matching. For each prospective pair of images we first perform  
300 coarse matching using normalized FFT-based cross-correlation to obtain a best rigid transform  
301 between them: relative rotation and XY-translation. The expected constraint transform enters as  
302 a mask describing a disc of preferred XY-translations within the correlation image.

303 The coarse transform between image A and B is then refined using a deformable mesh as  
304 follows. Within the overlap region of A and B, the A-pixels remain at fixed coordinates. For the  
305 B-image pixels, we erect a mesh of triangles and each of the B-pixel coordinates within are  
306 translated into barycentric coordinates (functions of the triangle vertices) which are variables.  
307 The normalized cross-correlation between A and B can now be expressed as a function of mesh  
308 vertex coordinates. A gradient descent process is used to find vertex positions that optimize  
309 correlation.

310 The reported point-pairs linking A to B are derived from the triangles of the mesh. Image-point A  
311 is defined as the centroid of a given mesh triangle prior to optimization. Its corresponding B-  
312 image point is obtained by calculating the affine transform that takes the triangle to its optimized  
313 counterpart, and applying that to the A-centroid.

314

### 315 *Matching point-pairs across layers*

316 Since the layers are nominally 40 nm thick and neural processes propagate through tissue at all  
317 possible angles, content in adjacent layers is grossly similar but isn't a precise match.  
318 Nevertheless, content-based matching as described above for same-layer image pairs (FFTs  
319 followed by deformable mesh optimization) works very well if combined again with expected  
320 pair-pair transforms for which we have high confidence.

321 First we match whole layers to each other: For each layer, individually, we collect the reported  
322 in-layer point matches and solve for its set of affine transform parameters that register that  
323 layer's 2D images to form a so-called montage. These data are used to render the layer at a  
324 reduced scale (~20X) to an image that we call the "montage scape". Scale reduction allows the  
325 problem to fit comfortably in RAM, reduces computation time, and most importantly, emphasizes  
326 larger size tissue features such as large neurites running parallel to the z-axis, which vary much  
327 more slowly as a function of z than neuropil. Each pair of montage scapes is matched by FFT  
328 cross-correlation at a series of angles and the best correspondence is determined. This is  
329 followed by manual inspection using TrakEM2 (Cardona et al., 2012) to verify this rough  
330 alignment.

331

### 332 *Aligning Section Montages and Section-order Correction*

333 For larger volumes, we implemented a fully automated procedure for whole-layer matching.  
334 SIFT features are extracted from section montages, and point-correspondences are determined

335 for all pairs of sections within a range of expected ordering mistakes (in our case within 100  
336 sections). We then use the number of point-correspondences between two sections as a  
337 surrogate for their inverse relative distance and identify the shortest possible path to visit all  
338 sections, resulting in an ordered series (Hanslovsky et al., 2017). Then, a regularized linear  
339 system is solved to calculate an affine transformation for each section that roughly aligns the  
340 volume.

341 With a given pair of layers now coarsely aligned, we subdivide each layer into an array of  
342 'blocks' (~10 x 10 neighborhoods of image tiles). We again step angles and calculate FFT  
343 cross-correlation, this time on pairs of corresponding blocks to find the best block-block  
344 transforms. As a result we know which images within the blocks pair with each other and what  
345 their relative transform ought to be. Again, we subdivide each image into local regions, estimate  
346 point correspondences using FFT-based cross-correlation, and collected these  
347 correspondences in a database.

348

#### 349 *Solving the volume*

350 With the full set of point pairs tabulated, each image is typically connected to several of its  
351 neighbors. We then construct a system of equations requiring that, under the sought affine  
352 parameter set that defines each image transformation, point-pairs should map to the same  
353 global point in the reconstructed volume. To avoid spurious deformation and volume shrinkage,  
354 the equation system is regularized to a roughly aligned volume. This roughly aligned volume  
355 depends on individual montages that were in turn regularized to a rigid model approximation  
356 that is independently estimated. The full system constitutes a large linear sparse matrix  
357 problem, whose solution provides the globally optimal transformation for all images  
358 simultaneously.

359



360 *Sources of error*

361 - Wrong (low-quality) point-pairs: These may occur due to the self-similarity of nominally  
362 good quality neural EM images. Errors are even more likely in tissue regions that are  
363 substantially devoid of neurons or texture, such as the lumen of the esophagus, or along the  
364 outer boundary of the sample where tissue is sparse or even absent from several image tiles.  
365 To address this error we employ (a) auxiliary contextual information about the likely transform  
366 between any two images that constrains matching derived from local image content alone, and  
367 (b) we impose a strict point-matching filter using Random Sample Consensus (RANSAC);  
368 (Fischler and Bolles, 1981) to separate true correspondences that behave consistently with  
369 respect to an affine transform up to a maximal correspondence displacement (Saalfeld et al.,  
370 2012).

371 - Missing point-matches: In some cases tissue damage, contamination or folds within a  
372 section lead to a lack of point-matches in a smaller region within the volume. This is most  
373 prominent when searching for point-matches across z. We address this issue by extending the  
374 point-match search beyond immediate neighbor sections.

375

376 *Render (Image Intensity Correction)*

377 During iterative volume reconstruction, gradient-domain processing is used to remove seams in  
378 two dimensions. A target gradient field is constructed by computing the gradient field of the input  
379 mosaic and zeroing out seam-crossing gradients. Then, a least-squares system is solved to find  
380 the new image whose gradients best fit the target field. In addition, low-frequency modulation is  
381 removed by computing the windowed average of adjacent mosaics and replacing the low-  
382 frequency components of an input mosaic with the low-frequency components of the average.  
383 We anticipate that future work will allow 3D processing of the whole-brain image volume  
384 (Kazhdan et al., 2015), reducing or eliminating section-to-section variations in intensity.

385

### 386 *Projection of arbor tracing across alignments*

387 With each new alignment, the CATMAID PostgreSQL database containing all neuronal skeleton  
388 coordinates (Schneider-Mizell et al., 2016) is dumped to retrieve their "world" coordinates  
389 (coordinates representing their physical location in the brain). Each of these world coordinates is  
390 then inversely transformed using the Renderer service (see "Stack management & relational  
391 database" section) to a set of "local" coordinates detailing the source tile visible at that location  
392 and the relative location within. The local coordinates are projected back into world coordinates  
393 using the new alignment's transformations. The updated coordinates are then applied to a new  
394 copy of the database.

395

### 396 **Neuron Tracing**

397 Neuron reconstructions are based on manual annotation of neuronal arbors from image stacks  
398 in CATMAID (<http://www.catmaid.org>) as described in (Schneider-Mizell et al., 2016). All  
399 neurons included in analyses are reconstructed by at least 2 team members, an initial tracer and  
400 a subsequent proofreader who corroborates the tracer's work. In the event that any tracer or  
401 proofreader encounters ambiguous features (neural processes or synapses that are not  
402 identifiable with 100% confidence), they consult other tracers and proofreaders to determine the  
403 validity of said features, climbing the experience ladder up to expert tracers as needed. If any  
404 feature remains ambiguous after scrutiny by an expert tracer, then said feature is not included in  
405 the neural reconstruction and/or flagged to be excluded from analyses. During the proofreading  
406 phase, the proofreader and tracer iteratively consult each other until each neuron is deemed  
407 complete per the specific tracing protocol to which it belongs. An assignment of completion does

408 not necessarily entail that an entire neuron's processes and synapses have been reconstructed  
409 (see "Tracing to Classification" and "Tracing to Completion" sections below).

410 The criteria to identify a chemical synapse include at least 3 of the 4 following features, with the  
411 first as an absolute requirement: 1) an active zone with vesicles; 2) presynaptic specializations  
412 such as a ribbon or T-bar with or without a platform; 3) synaptic clefts; 4) postsynaptic  
413 membrane specializations such as postsynaptic densities (PSDs). In flies, PSDs are variable,  
414 clearer at postsynaptic sites of KCs in a micro-glomerulus but often subtle, unclear, or absent in  
415 other atypical synaptic contacts (Prokop and Meinertzhagen, 2006). In the absence of clear  
416 PSDs, all cells that are immediately apposed across a clearly visible synaptic cleft are marked  
417 as postsynaptic. We did not attempt to identify electrical synapses (gap junctions), since they  
418 are unlikely to be resolved at the 4 nm x-y pixel size of this data set.

419

#### 420 *Tracing to Classification*

421 Often only reconstruction of backbone (e.g. microtubule-containing 'backbone' neurites,  
422 (Schneider-Mizell et al., 2016) or gross morphology is needed to classify a neuron based on  
423 expert identification or NBLAST-based neuron searching against an existing LM dataset. If  
424 either approach fails to find a match (as in the case of MB-CP2 in our study), the neuron may be  
425 deemed a new cell type. Neurons traced to classification are at a minimum skeletonized, with or  
426 without synapses, to the point at which their gross morphologies (or backbone skeletons)  
427 unambiguously recapitulate that observed by LM for a given cell class, or are unambiguously  
428 deemed as a new cell type not previously observed in all LM database from NBLAST neuron  
429 morphology search and/or multiple experts.

430

431 *Tracing to Completion*

432 All steps for tracing to classification were completed. Additionally, every identifiable process and  
433 every identifiable synapse is traced within the data set.

434

435 *Multiverse*

436 Three teams each comprising 2 members, 1 tracer and 1 proofreader, reconstructed the same  
437 KC fragment to completion in tracing environments blinded to each other. In the tracing phase,  
438 the tracer had access to the proofreader for consult and verification. During the proofreading  
439 phase the proofreader had access to the tracer for consult and verification. When complete the  
440 reconstructions were merged into a single viewing environment for comparison (Figure S6).

441

442 *Tracing of Projection Neurons*

443 Three protocols were used to reconstruct olfactory projection neurons (PNs) on the right side of  
444 the brain: **1)** putative PN boutons presynaptic to all traced claws of ~300 KCs as part of a  
445 separate ongoing effort of KC reconstructions (data not shown) were seeded and traced to  
446 classification. **2)** A seed section at the posterolateral bend of the mALT, proximal to MB calyx,  
447 was selected and all neurons not found via protocol 1 were traced first directly toward the calyx.  
448 Neurons that innervated calyx were traced to classification, whereas those that bypassed calyx  
449 were halted. **3)** A thorough visual survey of the calyx was conducted to ensure that all  
450 microglomerular structures had been identified and the untraced boutons within these  
451 microglomeruli were seeded with single skeleton nodes then traced to classification.

452 Classification of olfactory glomeruli in AL followed that of Grabe et al. (2015), except that VC3l  
453 and VC3m glomeruli were treated as separate glomeruli (Chou et al., 2010; Silbering et al.,

454 2011). Following Grabe et al. (2015) and Yu et al. (2010), VM6 and VP1 were combined into a  
455 single glomerulus due to morphological ambiguities, which we label as VM6 in this work.

456

#### 457 *Delimitation of Boutons in Projection Neurons*

458 Projection neuron axonal boutons in the calyx were identified by varicosities containing arrays of  
459 presynaptic active zones each apposed to many postsynaptic processes (Figure S1A). Skeleton  
460 nodes at the varicosity/intervaricosity borders were tagged as “bouton borders” such that they  
461 contained all synapses inside each varicosity.

462

#### 463 *Kenyon Cells and their Calyceal Postsynaptic Partners*

464 Three KCs from each of the KC classes that innervate main calyx ( $\gamma$ ,  $\alpha\beta c$ ,  $\alpha\beta s$ ,  $\alpha'\beta'm$ , and  
465  $\alpha'\beta'ap$ ) were selected from a larger set of several hundred KCs already traced to classification  
466 as part of an ongoing study. All neurons postsynaptic to every presynaptic release site of the 15  
467 KCs in the PN bouton-containing portion of the calyx (namely, postsynaptic partners in the  
468 calyx) were enumerated and traced to classification. Postsynaptic partners to low order KC  
469 dendrites were not traced unless these dendrites occupied the PN bouton-containing portion of  
470 the main calyx.

471

#### 472 *MB-CP2*

473 The 2 MB-CP2 neurons were traced to classification per the “Tracing to Classification” section  
474 above. Additionally, samples of their synapses were traced within each neuropil they innervate.  
475 More synapses were traced for the right hemisphere neuron than the left hemisphere, as the left

476 hemisphere neuron was traced to recapitulate the morphology and synapses observed in the  
477 right hemisphere.

478

## 479 **Neuronal Informatics**

### 480 *Electron-Light Microscopy tools ELM*

481 ELM provides a user interface to manually define a three-dimensional warp field between a light  
482 microscopy data set and the whole-brain EM dataset by specifying corresponding landmark  
483 points. It was built on top of the BigWarp Fiji plugin (Bogovic et al., 2016), which in turn was built  
484 on top of the BigDataViewer plugin (Pietzsch et al., 2015) for FIJI (Schindelin et al., 2012). ELM  
485 is aware of standard compartment boundary models available for the template fly brains and  
486 provides hotkeys to view the labels for these compartments; to go between coordinates in ELM  
487 and the EM dataset as viewed in CATMAID; and to go from a CATMAID URL to the  
488 corresponding point in ELM. ELM is available at <https://github.com/saalfeldlab/elm>.

489

### 490 *Transforming data between EM and light microscopy templates: elmr*

491 elmr (<https://github.com/jefferis/elmr>) is a package written in R (<http://www.r-project.org>) to  
492 facilitate bidirectional transfer of 3D data between adult brain EM and light level data.

493

### 494 *Neuropil surface models*

495 Previously defined surface models of the whole fly brain and MB calyx (Ito et al., 2014; Manton  
496 et al., 2014), based on the same template brain as the [virtualflybrain.org](http://virtualflybrain.org) project  
497 (<https://github.com/VirtualFlyBrain/DrosAdultBRAINdomains>), were transformed to the EM

498 volume using elmr. The AL glomerulus meshes were generated in Blender ([www.blender.org](http://www.blender.org))  
499 from EM-reconstructed skeletons of PN dendrites and olfactory receptor neuron termini  
500 (Schlegel et al., 2016).

501

## 502 QUANTIFICATION AND STATISTICAL ANALYSIS

503

### 504 **Comparison of signal-to-noise between volume EM datasets**

505 Determining the signal to noise ratio (S/N) of biological images is in general a subjective task,  
506 due to its variance under non-linear transformations (Erdogmus et al., 2004). As users of this  
507 data will likely care about biological structures, the determination of S/N should account for this,  
508 considering only the level of signal of these structures and not of things such as staining or  
509 cutting artifacts. The problem of S/N determination has been thoroughly treated in the case of  
510 super-resolution imaging where these ambiguities don't exist (for a review, see Lambert and  
511 Waters, 2016; see also Supplementary Note 1 in Li et al., 2015), but as yet there are no  
512 universally accepted, automated techniques to calculate the S/N in individual images where  
513 signal is dense in both spatial and frequency spaces, such as EM data of brain neuropil.

514 We present two measures of S/N here, an automated measure which avoids user biases, but  
515 can include some signal in noise and background calculations (feature based signal-to-noise  
516 ratios) and a simple technique which gives more precise S/Ns but is prone to bias (the cell-edge  
517 technique) which we use to verify the feature based signal-to-noise calculation. We apply these  
518 techniques to a range of publicly available data in order to evaluate the TEMCA2 method,  
519 sample images from each dataset are shown in Figure S4A.

520 In both cases we assume that noise is additive (and is independent of the magnitude of the  
521 signal) and symmetric. Such an assumption is likely false (e.g. electron shot noise is Poissonian  
522 and not symmetric at low numbers), however, such impacts are likely small based on manual  
523 examination of images and we assume the impacts of such an assumption are the same for all  
524 techniques. Such assumptions may fail however at very low signals where CCD and shot noise  
525 dominates, or at high signals, where processes such as non-linearity in CCD absorption become  
526 important.

527

### 528 *Feature based signal-to-noise ratios*

529 Fundamentally a signal-to-noise calculation of an image involves a calculation of the  
530 background level, the variation in this background level (which is assumed to be due to noise)  
531 and the calculation of the difference between the regions of interest and this background.  
532 Detecting what these regions are provides a challenge in EM data where images may not have  
533 clear background regions and where noise is contributed to through sample preparation.

534 In order to measure the S/N we assume that in any given image, the structures of interest  
535 provide the majority of features above the noise. That is, most structures present are biological  
536 in nature, rather than artifacts of sample preparation. Therefore with this assumption, it can be  
537 further assumed that key-points detected by feature detection algorithms will disproportionately  
538 fall on the regions of interest.

539 Given that animal cells and structures therein tend to be “blobby” due to hydrostatic processes  
540 (Jiang and Sun, 2013), we use a blob-detection algorithm (which compares areas of interest, c.f.  
541 edge or corner detection) to identify areas of interest. We use the SURF algorithm (Bay et al.,  
542 2008), though SIFT (Lowe, 2004), BRIEF (Calonder et al., 2010) or other detection algorithms



543 should provide enough feature locations to produce similar results (see for example (Kashif et  
544 al., 2016) and references therein).

545 Following the above, the variation in intensity of an image,  $I$ , in the local region of many feature  
546 points is likely to be mostly due to signal, and the variation in intensity nearby few (or no) feature  
547 points will be dominated by noise. The determination of such regions is done by generating an  
548 array of equal size to the original image and for each element, setting it to one if there is a  
549 feature in the corresponding element of the image. This array is then convolved with a Gaussian  
550 of width  $n$ , where  $n$  is chosen to maximize the SNR in a random selection of five images from  
551 each sample in an effort to avoid bias between samples.

552 To select a region dominated by noise we then shuffle this array before sorting it (to avoid  
553 biases in sorting algorithms) and take the lowest point. We then block out a region  $2n$  square  
554 and resort the array nine more times (for a total of ten selected regions), forming the set of  
555 points  $p_{\text{low}}$ . We likewise perform a selection for the points of maximum variation ( $p_{\text{high}}$ ). See  
556 Figure S4B for an illustration of the entire process.

557 To determine the level of noise, we first generate a copy of the image to which a  
558 three pixel median filter has been applied. We then subtract this median image from the original  
559 to generate a noise dominated image,  $I'$ . At each of the minimum feature points (where noise is  
560 most dominant); the standard deviation of this image is taken over a three pixel square  
561 neighborhood. The level of noise,  $N$ , is then calculated as the mean of these standard  
562 deviations, i.e.,

563 
$$N = \langle \sigma[I'(p_{\text{low}} \pm 1)] \rangle. (1)$$

564 The background level of the image,  $B$ , is determined by taking the mean of these noise-  
565 dominated regions (again taking a mean over the three pixel neighborhood), following on from  
566 the assumption of symmetric noise, giving

567

$$568 \quad B = \langle \langle I(p_{low} \pm 1) \rangle \rangle. \quad (2)$$

569

570 The level of signal is then taken to be the mean of the (absolute) difference of the mean of these  
571 three pixel neighborhoods around  $p_{high}$ , and the background. This results in the SNR being given  
572 by

573

$$574 \quad S/N = \frac{\langle |I(p_{high \pm 1}) - B| \rangle}{N}. \quad (3)$$

575

576 As most images lack large areas that consist of only resin, this simple background selection is  
577 not perfect, as such the S/Ns generated should be considered lower limits in most cases. We  
578 show the S/N as a function of the acquisition rate for a variety of EM techniques in figure 2C.

579 This measure works reasonably well when combining voxels producing S/Ns within 20% (1.5  
580 dB) of the expected based on additive Gaussian noise (Figure S4C), although the ATUM data of  
581 Kasthuri et al. (2011) increases by more than others, a possible sign of their voxels (3x3 nm in  
582 X-Y) under-sampling biological features. This method produces the expected increase when  
583 scaling down images producing equivalent normalized S/Ns (Figure S4C). Increasing the size  
584 of images also increases the S/N, but this is due to the generation of new pixels with similar  
585 values to old ones inside the regions considered for noise due to the fact that creation of these

586 new pixels functions as a pseudo-low pass filter. As expected this measure reports larger S/N  
587 values when Gaussian blurring is applied (as noise is disproportionately removed when a low  
588 pass filter is applied) (Figure S4C). In images generated by super resolution techniques  
589 therefore, this method may be inappropriate and should be modified to, for example, use  
590 distance based regions rather than pixel based regions.

591

### 592 *Cell-membrane signal-to-noise*

593 Although the feature based signal-to-noise measure avoids many human biases in the selection  
594 of regions used to calculate background and signal levels, it unfortunately can often incorporate  
595 biological structure (our signal of interest) into these calculations.

596 We therefore introduce a complementary measure to compare the S/N of biological EM data  
597 and verify that the feature based signal-to-noise calculation is valid. At its heart, this is simply a  
598 comparison between the signal level at a cell edge and the background nearby, taken at  
599 multiple points within an image.

600 This is achieved by a user creating a line inside a random 100x100 pixel region which contains  
601 only resin and, ideally nearby, a line which covers only a stained cell boundary. Pixels along  
602 these lines (as selected by Bresenham's line algorithm (Bresenham, 1965)) are considered to  
603 be background or signal respectively. After selection of a background and signal line within each  
604 region, another 100x100 pixel region is chosen, until twenty lines in total (ten background, ten  
605 signal) are selected, skipping a region if there is not a suitable region in which to select both.

606 The noise is considered to be the standard deviation of the pixel intensities across all  
607 background intensities, and the background level the mean. The signal value is considered to  
608 be a mean of the signal pixels.

609 We show an example of the selection process in Figure S4D-E. Signal-to-noise ratios found via  
610 this method Figure S4E, are found to be within 10% of that found via the feature method,  
611 suggesting the former may be used for a fast, bias-free, comparison between methods.

612

### 613 **Analysis of neuronal geometry**

614 Data analysis was conducted using custom packages developed in R. We imported EM  
615 skeleton data from the CATMAID tracing environment using rcatmaid  
616 (<https://github.com/jefferis/rcatmaid>). Section thickness in CATMAID was specified to be 35 nm;  
617 all analyses of skeleton geometry therefore use this value. For qualitative and quantitative  
618 comparison with LM neurons, the EM skeletons were transformed into coordinate spaces of  
619 various LM template brains using elmr based on landmark pairs defined with ELM (see above).  
620 The R NeuroAnatomy Toolbox package (nat, <https://github.com/jefferis/nat>) was used for  
621 geometric computations, 3D visualization of neuronal skeletons and surface models.

622

### 623 *NBLAST neuron search for Projection Neurons*

624 The EM skeletons of PNs were transformed into the FCWB template brain space for NBLAST  
625 neuron search against the ~400 LM PNs previously classified in the FlyCircuit dataset by  
626 glomerulus (Costa et al., 2016). This is enabled by a single elmr function nblast\_fafb. The  
627 search functionality is built on the nat.nblast package (<https://github.com/jefferislab/nat.nblast>)  
628 and uses data distributed with the flycircuit package (<https://github.com/jefferis/flycircuit>), both of  
629 which are installed with elmr. Only PNs whose candidate glomerular types exist in the FlyCircuit  
630 dataset are used. Since EM-reconstructed PNs often have many additional fine processes  
631 compared with their LM counterparts, EM skeletons were used as NBLAST targets rather than

632 queries, in reverse to conventional NBLAST option. For each PN in EM, the top 5 hits of LM  
633 neurons and their NBLAST scores are tabulated to aid and/or confirm expert glomerular  
634 identification of PNs. Further details of the NBLAST neuron search, the associated LM data, and  
635 an online web-app for on-the-fly NBLAST queries are available at <http://jefferislab.org/si/nblast>.

636

### 637 *NBLAST clustering for PNs*

638 Pair-wise all by all NBLAST scores were computed for all uniglomerular PNs (nat.nblast function  
639 nblast\_allbyall) after transformation into the JFRC2 template brain (Jenett et al., 2012) space  
640 using elmr. We used unsupervised hierarchical clustering with Ward's method based on the  
641 NBLAST scores (nat function nhclust). The unsquared Euclidean distance, rather than the  
642 default square of the Euclidean distance, is used as the Y axis for dendrograms.

643

### 644 *Analysis and renderings of PN Arbors in Calyx*

645 We wished to quantify homotypic physical clustering of PNs in EM versus LM data. In summary,  
646 we randomly selected the same number of LM PNs as EM PNs from an existing LM database,  
647 subsetted the calyx arbors of the PNs with a calyx bounding box, and computed pair-wise  
648 geometric measures (mean nearest distance and NBLAST scores). Mean nearest distance  
649 quantifies physical co-location of arbors while NBLAST scores measure morphological similarity  
650 for a given pair of neurons. Details are as follows.

651 LM datasets (Chiang et al., 2011) of PNs previously registered to a common template brain  
652 (Costa et al., 2016) were used for comparisons with EM PNs. From the LM dataset we first  
653 determined which glomeruli had multiple EM and LM tracings available. One glomerulus, DA3,  
654 was excluded because in LM data DA3 has *en passant* collaterals that do not enter the MB

655 calyx (Jefferis et al., 2007). We then selected a random set of LM skeletons so that we had the  
656 same number of LM and EM skeletons for each glomerulus.

657 Both EM and LM PNs were transformed onto a common template brain, the JFRC2 template  
658 used by virtualflybrain.org (Manton et al., 2014), and resampled with a 1  $\mu\text{m}$  interval to ensure  
659 uniform representation of skeletons. PN collaterals in the calyx were obtained by two steps: 1)  
660 subset the skeletons with a bounding box defined by the right-side calyx surface model from the  
661 neuropil segmentation generated and used by the Virtual Fly Brain (Ito et al., 2014; Manton et  
662 al., 2014; Milyaev et al., 2012); 2) remove the backbone of each PNs so only the *en passant*  
663 collaterals entering the calyx are used for distance calculation.

664 For each glomerulus, geometric measures (mean nearest distance and NBLAST scores) were  
665 computed for each pair-wise combination of PNs of the same type. For mean nearest distance,  
666 we iterated over each node of the query neuron to find the nearest node in the target neuron,  
667 measured the Euclidean distance, and calculate the mean distance for all nodes in the query  
668 neurons (forward distance). When the query neuron is significantly larger than target neuron,  
669 artifactually long nearest distance can be introduced by end points in the larger neuron being far  
670 away from closest nodes from the smaller neuron. To address this issue, we calculated the  
671 same mean nearest distance with the query neuron and target neuron in reverse (reverse  
672 distance) and picked only the smaller of the forward and reverse distances. To quantify  
673 morphological similarity, NBLAST scores were computed for PN arbors in calyx in a similar pair-  
674 wise manner. The distributions of all intra-glomerular pairwise mean distances and NBLAST  
675 scores of PNs were plotted, and for both measures the difference between EM and LM  
676 population data were analyzed with a Student t-test.

677 To visualize only calyx arbors of PNs, a calyx bounding box as defined by calyx neuropil  
678 segmentation in the Virtual Fly Brain template brain (JFRC2) was used to subset both EM and

679 LM PN skeletons. Boutons of PNs in calyx are delimited by tagged nodes bordering bouton  
680 blocks of the skeletons (See Neuron Tracing). Only skeletons in PN boutons are kept for  
681 rendering concentric organizations of boutons in calyx. For all tracing visualizations, linear  
682 interpolation of neighbouring skeleton nodes was applied to smoothen artifactual spikes in  
683 neuron tracing due to registration or alignment errors.

684

#### 685 DATA AND SOFTWARE AVAILABILITY

686 All files and movies are available through the following website: <http://www.temca2data.org>

687

#### 688 ADDITIONAL RESOURCES

689 Access to the full adult fly brain data set is available at: <http://www.temca2data.org>

690 Analysis code is available at: [https://github.com/dbock/bocklab\\_public/tree/master/temca2data](https://github.com/dbock/bocklab_public/tree/master/temca2data)

691

#### 692 **Supplemental Figure and Table Legends**

693

#### 694 **Figure S1. Neuronal Architecture of the MB Calyx. Related to Figure 1.**

695 (A) TEM micrograph of a calycal microglomerulus. A canonical olfactory PN axonal varicosity  
696 (bouton) is presynaptic to several KC dendritic claws. This architecture is collectively referred to  
697 as a microglomerulus. The PN terminal (pink) provides input to KC neurites at synaptic sites.  
698 Arrows: presynaptic release sites.

699 (B) Schematic of microglomerular inputs to KCs in calyx of *Drosophila*. The PN axons from AL  
700 extend collaterals into the calyx and form boutons containing synapses to claw-shaped

701 dendrites from several KCs. The complete composition of cell types that provide driving inputs in  
702 microglomerular form in the calyx is unknown, as is the distribution of other KC inputs outside of  
703 claws. KCs have been shown to form presynaptic release sites in the calyx most of which, but  
704 not all, are outside of claws, and the complete postsynaptic partner cohort is unknown. Scale  
705 Bar: 1  $\mu\text{m}$  in (A).

706

707 **Figure S2. Fast Stage Step and Settle, Overview of Details. Related to Figure 1.**

708 (A) TEMCA equipped with Fast Stage. Arrowheads: Fast Stage (black); elongated vacuum  
709 chamber (white); 2 x 2 camera array (red).

710 (B) Upper panel: Schematic of Fast Stage showing the locations of bearings, dampers and  
711 vacuum bellows. Left: driven mass; Right: exterior view. Lower panel: Cut away of Fast Stage.  
712 Arrows: rolling element damper locations (black arrows); vacuum bellows (black arrowhead);  
713 rolling-element 'tip' bearing (white arrowhead).

714 (C) Plot of Fast Stage motion over time following an 8  $\mu\text{m}$  move.

715 (D) Schematic of Fast Stage stepping pattern. Left: small step/ big step schematic. Numbers  
716 are camera numbers. Right: Scanning axes and stages. Red point is origin of scanning.

717 (E) Autoloader (white arrowhead) mounted to an accessory port on FEI Tecnai Spirit BioTWIN.

718 (F) Schematic of the Autoloader system diagramming motor positions and movement axes as well  
719 as vacuum and pneumatic subsystems.

720

721 **Movie S1. Fast Stage vs. FEI CompuStage. Related to Figure 1.**



722 Movie showing the acquisition of 2 fields of view using the FEI CompuStage (left) as compared  
723 to the custom FastStage acquiring 17 fields of view (right) in the same time.

724 Scale Bar: 1  $\mu\text{m}$ .

725

726 **Movie S2. Autoloader Cutaway. Related to Figure 1.**

727 CAD movie of Autoloader detailing actions to retrieve and image a sample.

728

729 **Movie S3. Autoloader Pick-and-Place. Related to Figure 1.**

730 Movie of Autoloader pick-and-place routine. The Autoloader locates the grid within the cassette,  
731 moves to a pre-pick location, confirms positioning, picks grid from cassette in a two step process  
732 with positioning assessments during the process, moves to the aligner, assesses the rotational  
733 angle of the grid, if necessary places the grid on the aligner and aligns the grid, retrieves the  
734 grid from the aligner, and inserts into the TEM column (insertion to column not shown).  
735 Following imaging, the Autoloader locates the correct cassette pocket, confirms positioning,  
736 replaces the grid in the cassette, and confirms that the grid is correctly located within the  
737 cassette. Changes in image quality indicate a change in camera frame rate. High quality  
738 images are used for positional assessments; lower quality images are used for diagnostic  
739 purposes.

740

741 **Figure S3. Sample Preparation for Electron Microscopy. Related to Figure 1.**

742 (A) *D. melanogaster* brain following sample preparation.

743 (B) 3D volumetric rendering of X-ray tomogram data from embedded *D. melanogaster* brain.

744 (C) Sample support test showing a failed result with wrinkling of the support film on 3mm grid.  
745 (D) Sample support test showing a successful result with no wrinkling or relaxation of the  
746 support film evident.

747 Scale Bars: 250  $\mu\text{m}$  in (A-B).

748

749 **Figure S4. Comparison of S/N Between EM Imaging Methods. Related to Figure 2.**

750 (A) Sample images from a variety of EM data sources. From left to right, ATUM-SEM (Kasthuri  
751 et al., 2015), FIB-SEM (Takemura et al., 2015), SBEM (Briggman et al., 2011), ssTEM  
752 (Takemura et al., 2013), TEMCA1 (Bock et al., 2011), TEMCA2 (this paper). The top row shows  
753 images of side length 3  $\mu\text{m}$  while the lower row shows 100 pixel subimages of each. The  
754 corresponding areas of these 100 pixel subimages are shown with a black square inside each  
755 image.

756 (B) From left to right, a TEMCA2 image sample, the key-points detected in the image,  
757 convolution of the key-points illustrating dense and sparse feature regions (purple – low, yellow  
758 high), the region of sparse features selected from the TEMCA2 image showing a resin filled  
759 area suitable for noise calculation.

760 (C) For all plots points and data sources are as per Figure 2G and Table S3. The normalized  
761 S/N versus acquisition rates of a variety of EM techniques (as color coded) are shown for  
762 different methods. From left to right, feature-based method as described in (B); Stacked Voxels  
763 means that voxels are combined across a layer (SBEM not shown due to alignments not being  
764 clear) and across 50 random images; Reduced Res means that voxels correspond to a higher  
765 physical size across 100 random images; Scaled Up Res means that voxels correspond to a

766 smaller physical size across 100 random images; Gaussian Blur means that voxels have been  
767 blurred with a Gaussian filter across 100 random images.

768 (D) Left, sample image shows a region selected to quantify the noise (green) and a region to  
769 quantify the signal (red) for the cell-edge technique. Right, the intensity for noise and signal  
770 regions versus number of pixels in each region.

771 (E) Normalized S/N versus acquisition rate as determined via the cell-edge technique across 5  
772 random images from each technique (same color codes as Figure S4C), each of which had 10  
773 regions of background/noise and signal determined. Points and data sources are as per Figure  
774 2G and Table S3.

775

776 **Figure S5. Re-imaging Synapses in Pedunculus, Montaging, and Intensity Correction in**  
777 **2D. Related to Figure 2.**

778 (A-B) Matching ~1.25 $\mu$ m wide fields of view in section 3887 from the imaged volume (A) and re-  
779 imaged at higher resolution (B). (A) 4nm/pixel; (B) 1.3nm/pixel

780 (C-E) Montaging high-dose and low-dose. Debris present on a section necessitated collection  
781 of a small subset of tiles at lower dose than the remainder of the mosaic.

782 (C) The debris and border of the low-dose mosaic can be seen in the context of the entire  
783 section.

784 (D) Debris and mosaic boundary are clearly visible.

785 (E) The boundary of the joined high-dose and low-dose mosaics is evident (arrowheads).

786 (F-G) 2D intensity correction. (F) Mosaic of a single section prior to 2D intensity correction.  
787 Intensity differences between tiles are evident in (G).

788 (H-I) (H) Same section as in (F) following 2D intensity correction. Intensity differences between  
789 tiles are greatly diminished (I).

790 Scale Bars: 200 nm in (A-B), 100  $\mu\text{m}$  in (C), 50  $\mu\text{m}$  in (D), 2  $\mu\text{m}$  in (E), 100  $\mu\text{m}$  in (F, H), 2  $\mu\text{m}$  in  
791 (G, I).

792

793 **Figure S6. Reliable Tracing. Related to Figure 2.**

794 (A-C) Three teams, each comprising 1 tracer and 1 proofreader, reconstructed the same  
795 neuron, with each team blinded to the others.

796 (A) Synaptic counts and gross morphologies are comparable across teams. Arrows indicate  
797 location of synapse shown IN TEM inset. Asterisks in inset indicate locations of a single KC  
798 fingertip postsynaptic to the PN input.

799 (B) Zoom-in to a claw with an input discrepancy across teams. Gold team discovered a *bona*  
800 *fide* process with 6 postsynapses to a putative PN input. Green team discovered 1/5 of the  
801 postsynapses on the proximal portion of this process but was not confident to trace the process  
802 further. Purple team was not confident to trace this process at all.

803 (C) Network connectivity matched with only 1 inferior input difference shown by red node (PN7).  
804 Orange nodes indicate projection neuron bouton inputs to the KC. One putative PN input was  
805 missed by team 2, indicated by red box. Colored skeletons (A) and graph nodes (B) and indicate  
806 team membership: team 1, green; team 2, gold; team 3, magenta.

807 Scale bars:  $\sim 20 \mu\text{m}$  in (A), 250 nm in (A) inset,  $\sim 2 \mu\text{m}$  in (B).

808

809 **Table S1. NBLAST Scores for PNs. Related to Figure 4.**

810

811 **Figure S7. EM versus LM PNs. Related to Figure 5.**

812 (A) Qualitative comparison of calyx collaterals of EM versus LM PNs. Only skeletons inside the  
813 calyx bounding box is shown, as described in Methods. Only LM PNs from (Jefferis et al. 2007)  
814 are used. Glomeruli are ordered by the difference of mean distances between homotypic EM  
815 PNs and LM PNs. Left column, EM PNs. Middle column, the pair of LM PNs with median pair-  
816 wise mean nearest distances. Right column, LM PNs.

817 (B) Pair-wise NBLAST scores for calyx collaterals of homotypic PNs. Glomeruli are ordered by  
818 the difference of NBLAST scores between EM and LM PNs. Each data point represents the  
819 NBLAST scores between the calyx collaterals of a pair of PNs from the same glomerulus.

820 (C) Histogram of NBLAST scores across all glomeruli. The average NBLAST scores were  
821 significantly higher for PNs in EM than PNs in LM (EM:  $0.55 \pm 0.19$ , LM:  $0.35 \pm 0.19$ , t test p-  
822 value  $3.6e-15$ ), indicating that EM PNs are morphologically more similar to each other than LM  
823 PNs.

824 Scale bar:  $\sim 10 \mu\text{m}$  in (A).

825

826 **Table S2. KC Postsynaptic Partners in the MB Main Calyx. Related to Figure 7.**

827 Eighty-seven percent of the KC postsynaptic targets are driven by  $\alpha\beta\text{c-}$ ,  $\alpha\beta\text{s-}$ , or  $\gamma$  KCs. The  $\alpha'\beta'$   
828 KCs drive only 13%. Only 4 neurons are responsible for 75% of the postsynaptic partners. The  
829  $\alpha'\beta'$  KCs are only presynaptic to other KCs and the APL.

830

831 **Movie S4. Whole Brain EM Volume. Related to Figure 1.**

832 All sections through the dataset are shown. Left, a low-resolution view of the entire section  
833 extent. White square is centered on x,y position of the microglomerulus shown in Figure S1A.  
834 Right, a zoom-in on a field of view at the center of the white square in the low-resolution view.  
835 Section number 5372 shows the microglomerulus of Figure S1A.

836

### 837 **Movie S5. Neuropils Innervated by MB-CP2. Related to Figure 6.**

838 A previously unidentified neuron, MB-CP2 (orange skeleton), shown inside the whole brain  
839 mesh (gray outline) and several other neuropil meshes obtained via LM and registered to the  
840 EM volume. MB-CP2 is purely postsynaptic (blue dots) in several regions and both pre- (red  
841 dots) and postsynaptic in other regions (first synapse isolation). MB-CP2 innervates the MB  
842 (patina), where it is postsynaptic to  $\gamma$  and  $\gamma_d$  KCs in the MB pedunculus (second synaptic  
843 isolation; MB-CP2 skeleton subsequently isolated in blue), and presynaptic to all olfactory KC  
844 subtypes at microglomeruli in the MB calyx (second synaptic isolation; MB-CP2 skeleton  
845 subsequently isolated in red), where it also receives input from currently unknown cell types.  
846 Additionally, it is pre- and postsynaptic in the dAC (compartment mesh not shown), LH, and  
847 SLP. MB-CP2 innervates the antlers (cyan), LH (blue), posterior lateral protocerebrum (green),  
848 superior clamp (magenta), superior medial protocerebrum (red), superior intermediate  
849 protocerebrum (gold), and superior lateral protocerebrum (pink) where it is purely postsynaptic  
850 (shown in first synaptic isolation). See Figure 6G for synaptic input/output summary schematic  
851 by neuropil. Initial axes: dorsal, top; ventral, bottom. Movie begins from an anterior perspective.

852

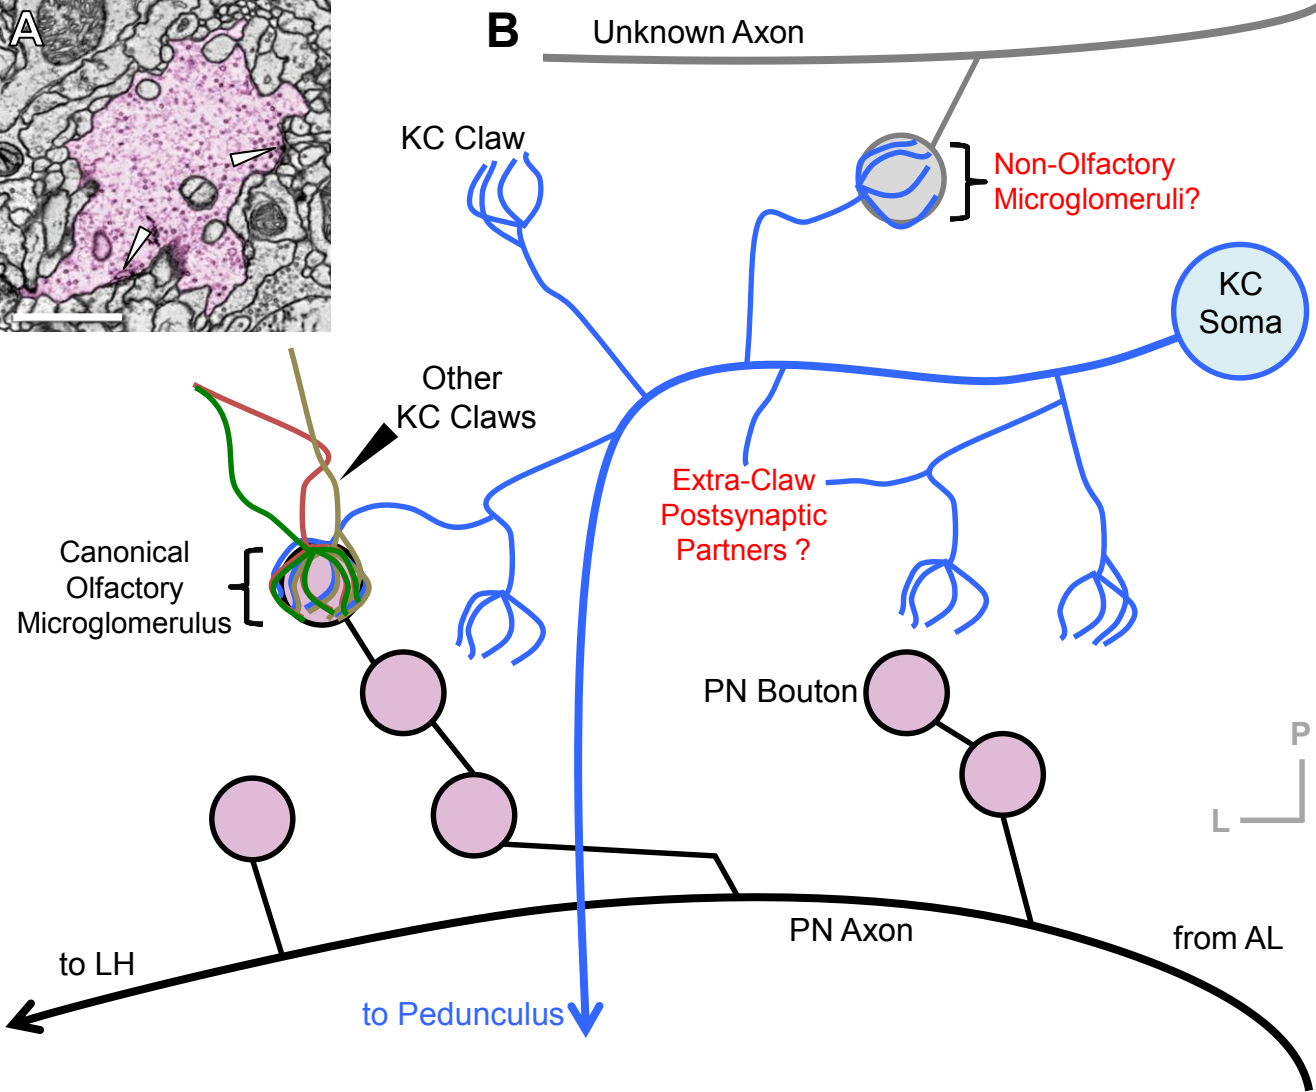

**Figure S1. Neuronal Architecture of the MB Calyx. Related to Figure 1.**

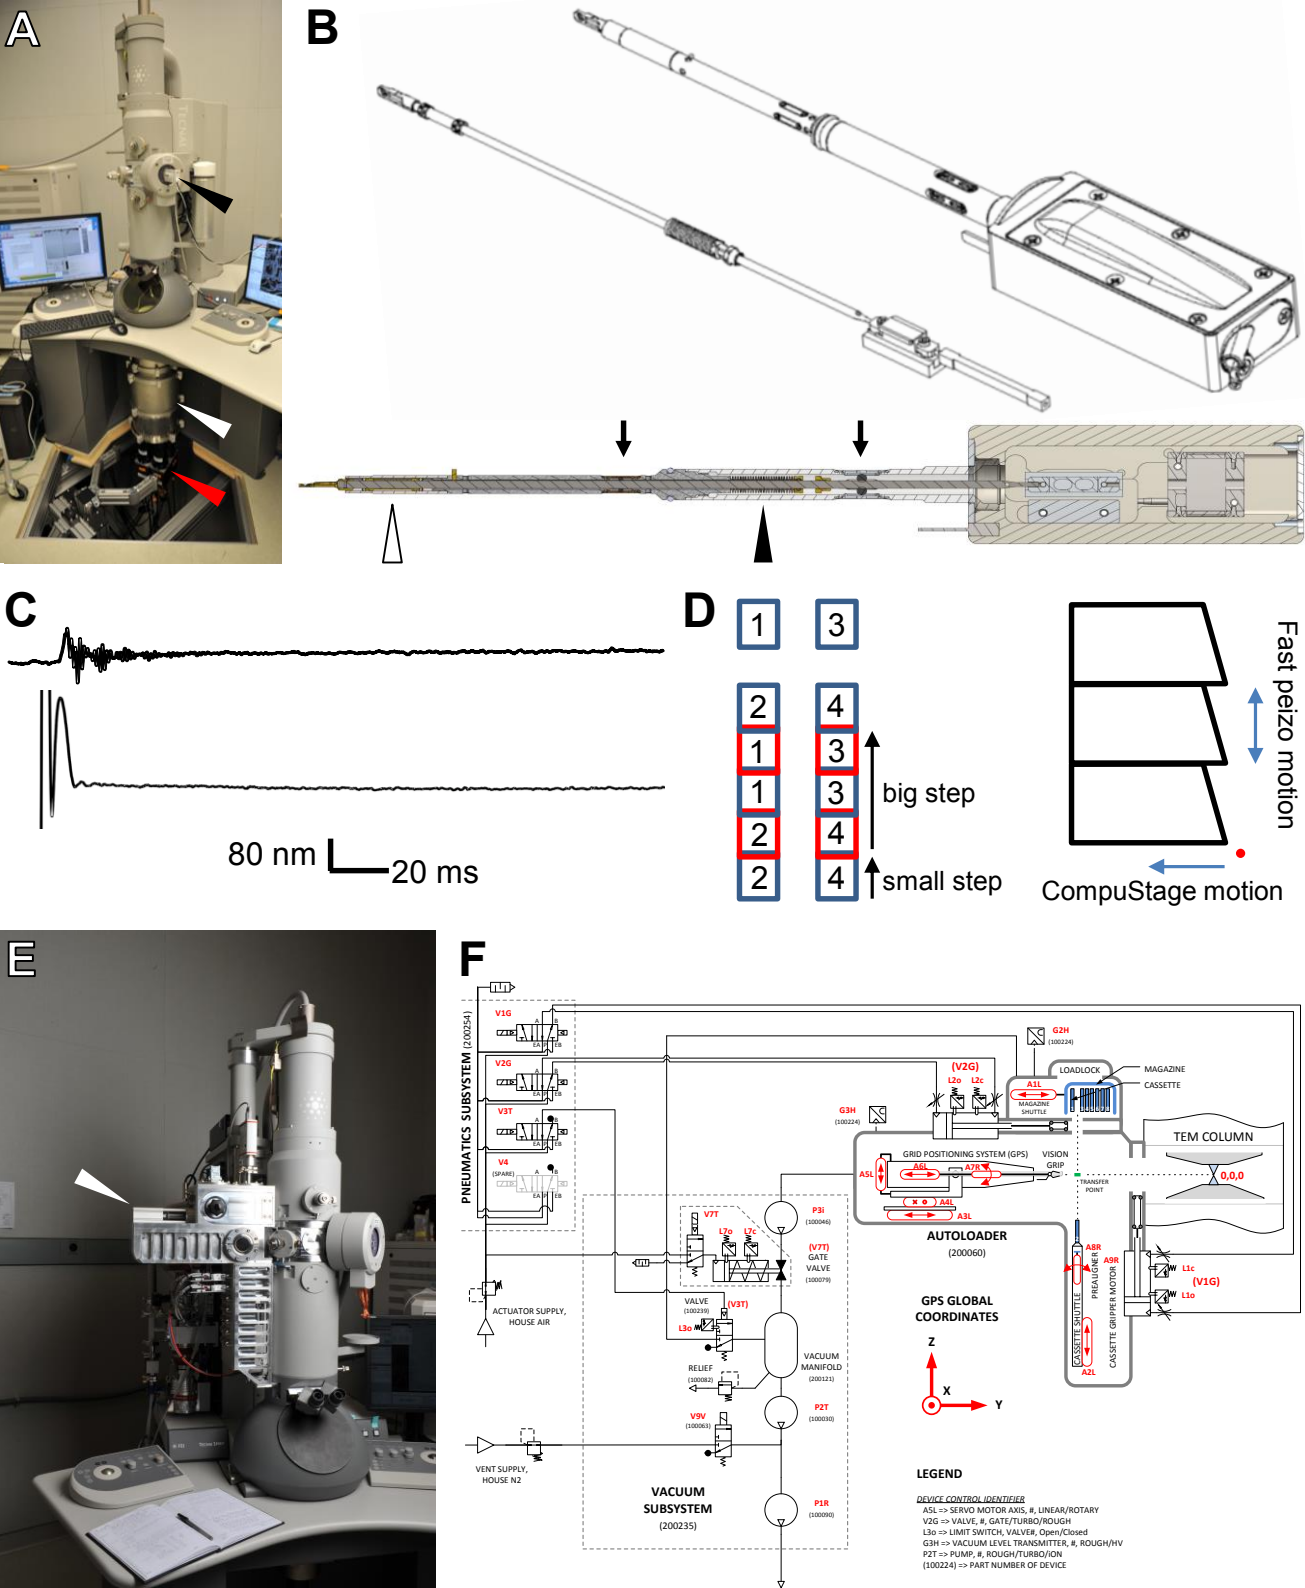

**Figure S2. Fast Stage Step and Settle, Overview of Details. Related to Figure 1.**



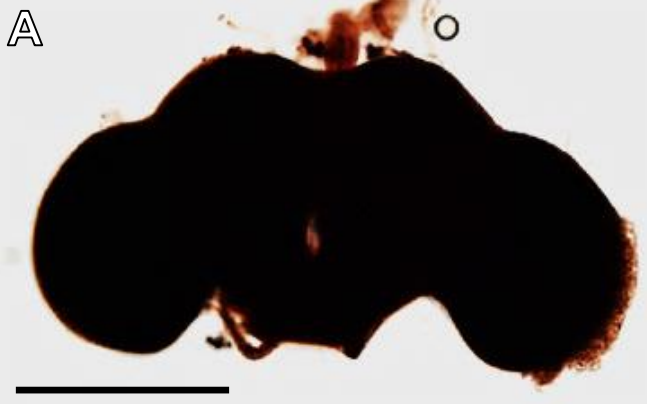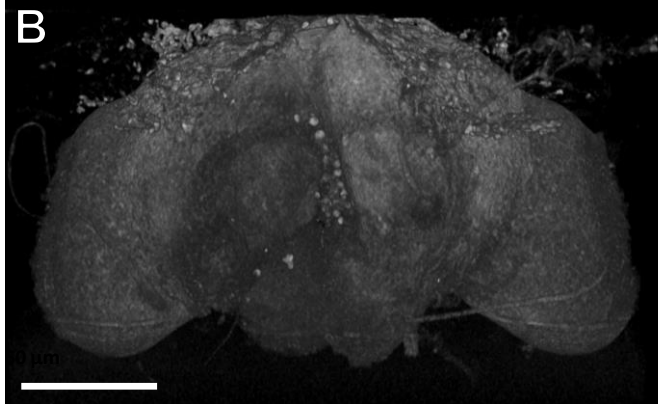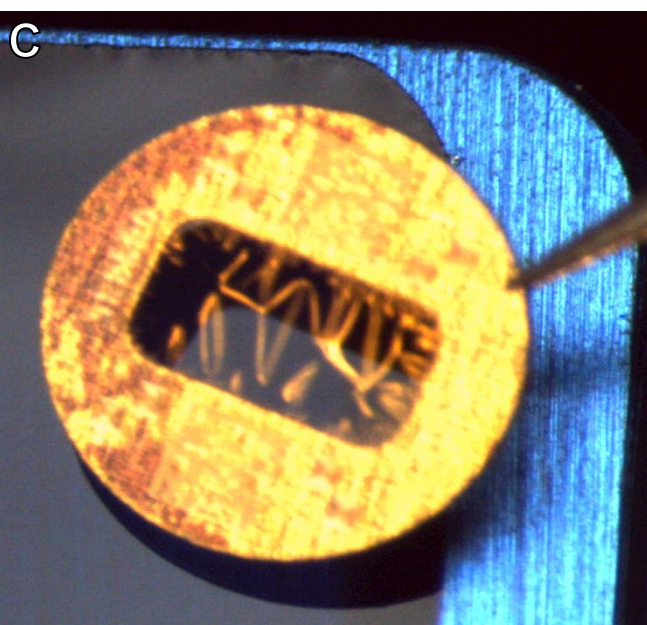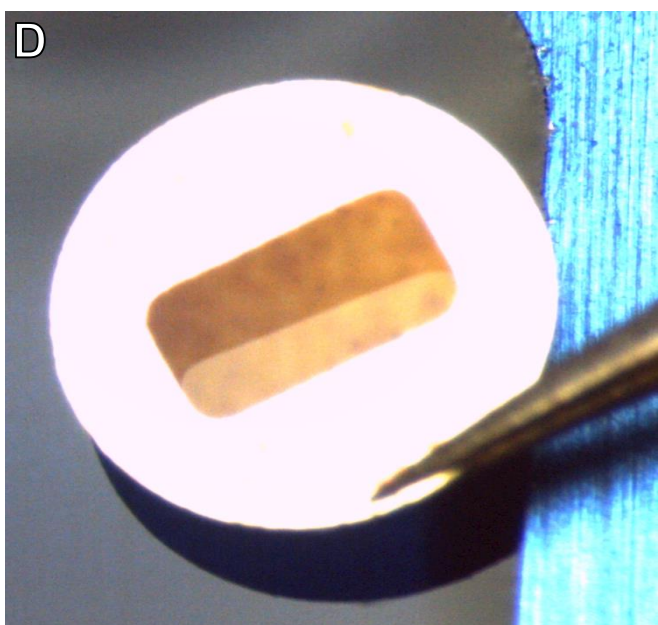

**Figure S3. Sample Preparation for Electron Microscopy. Related to Figure 1.**

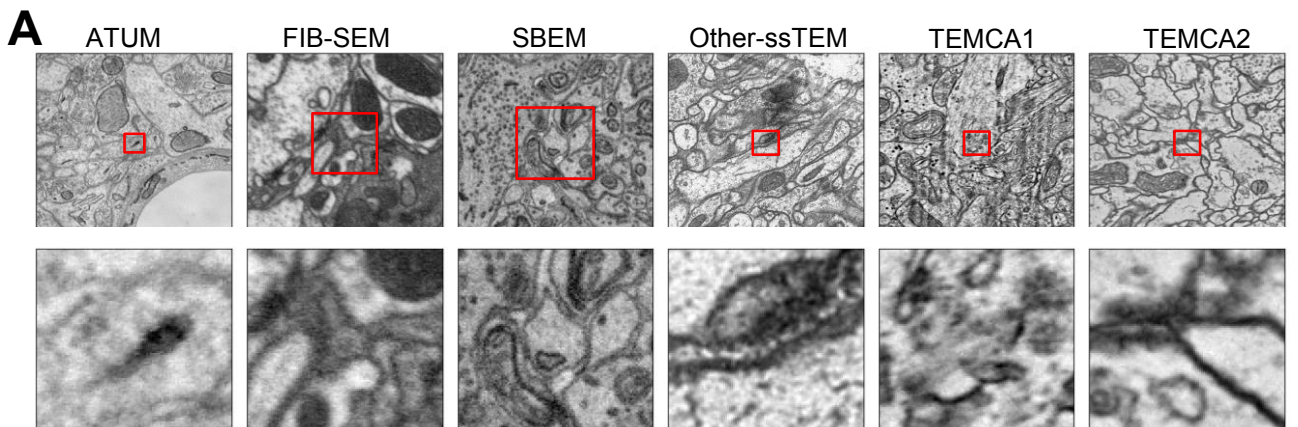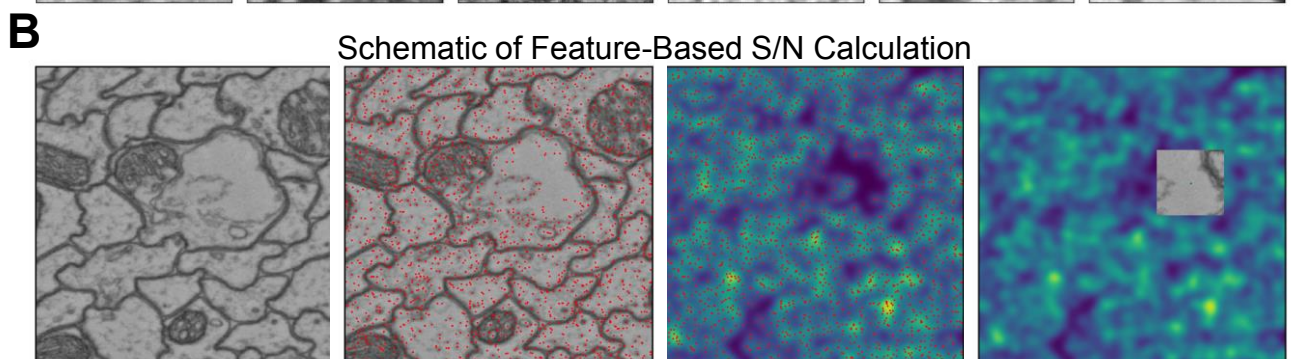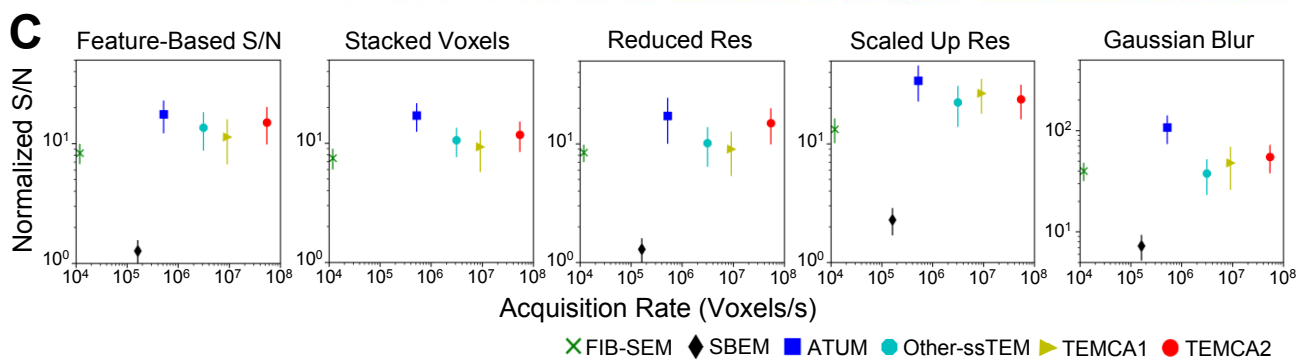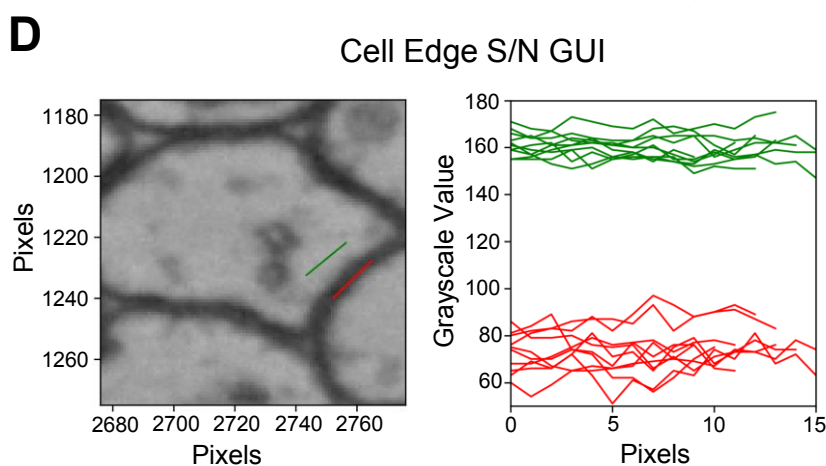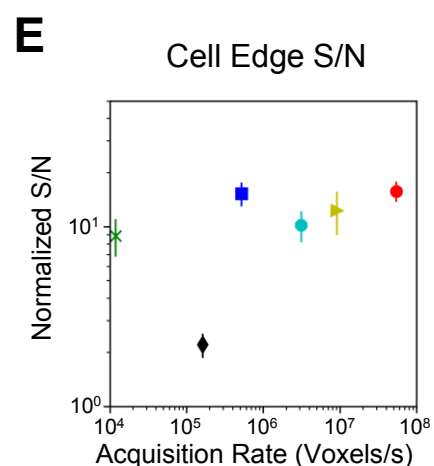

**Figure S4. Comparison of S/N Between EM Imaging Methods. Related to Figure 2.**

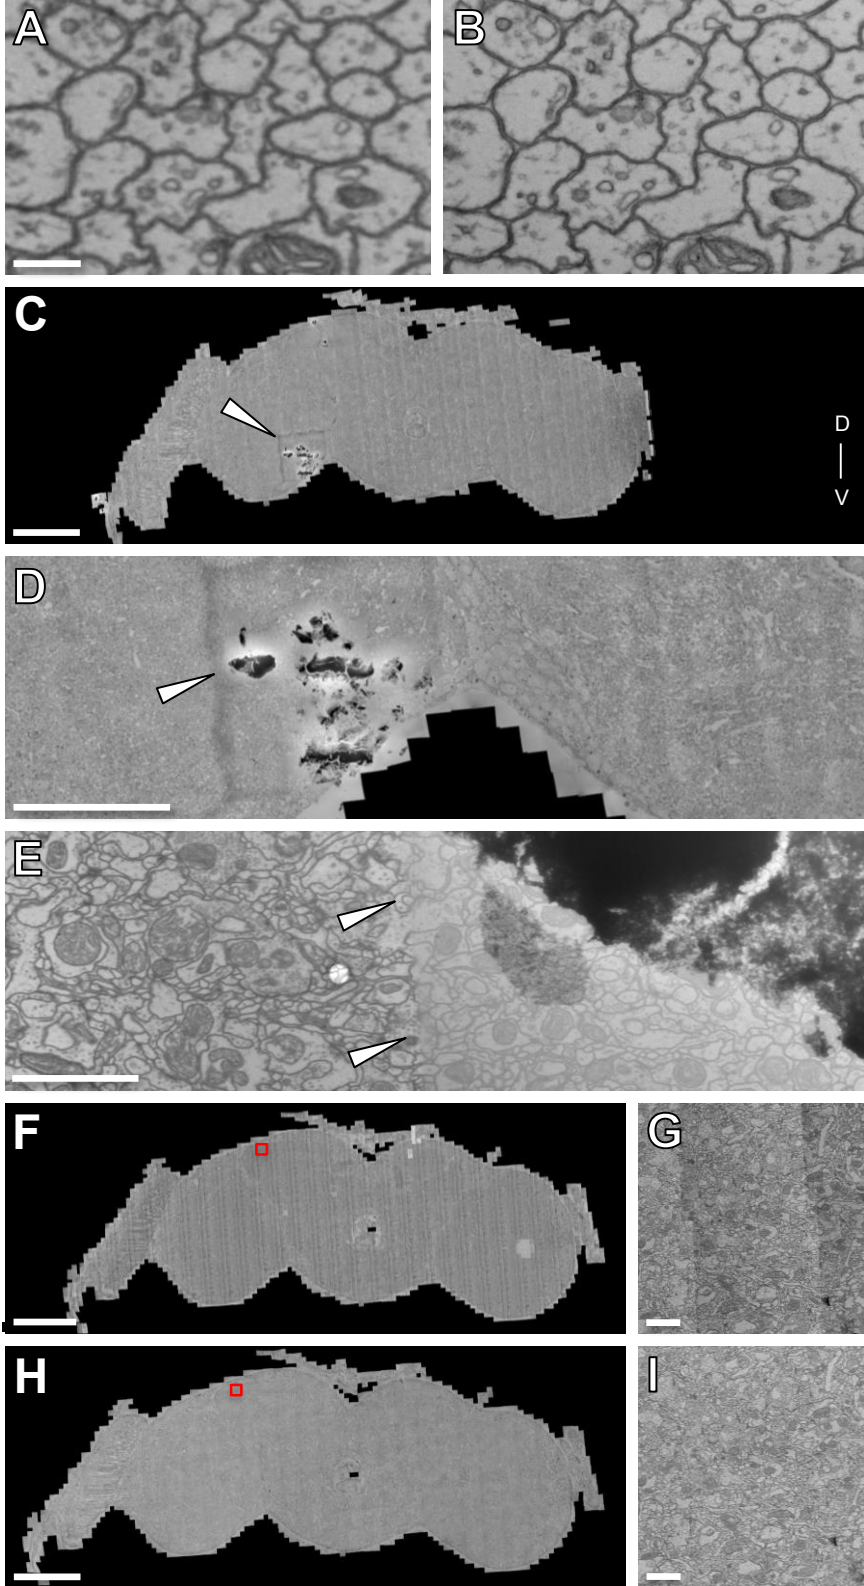

**Figure S5. Re-imaging Synapses in Pedunculus, Montaging, and Intensity Correction in 2D. Related to Figure 2.**

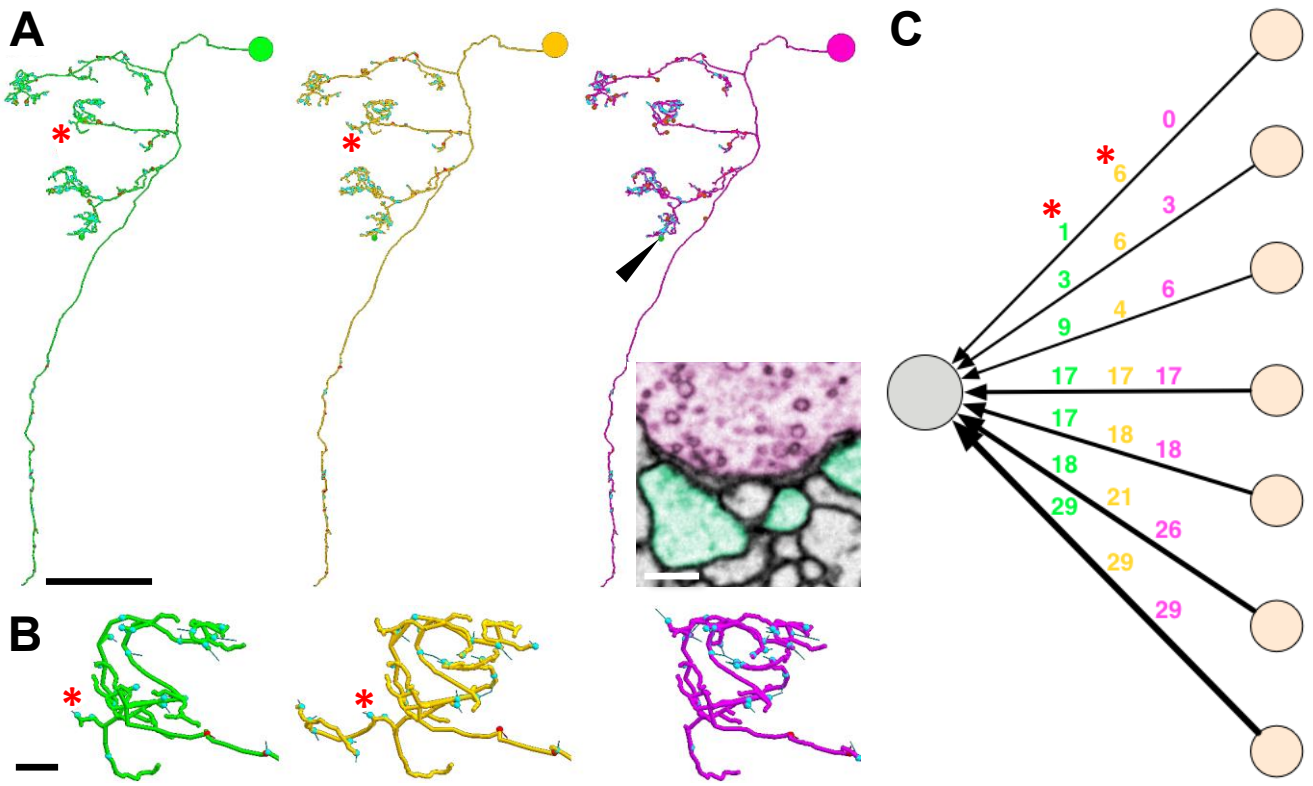

**Figure S6. Reliable Tracing. Related to Figure 2.**

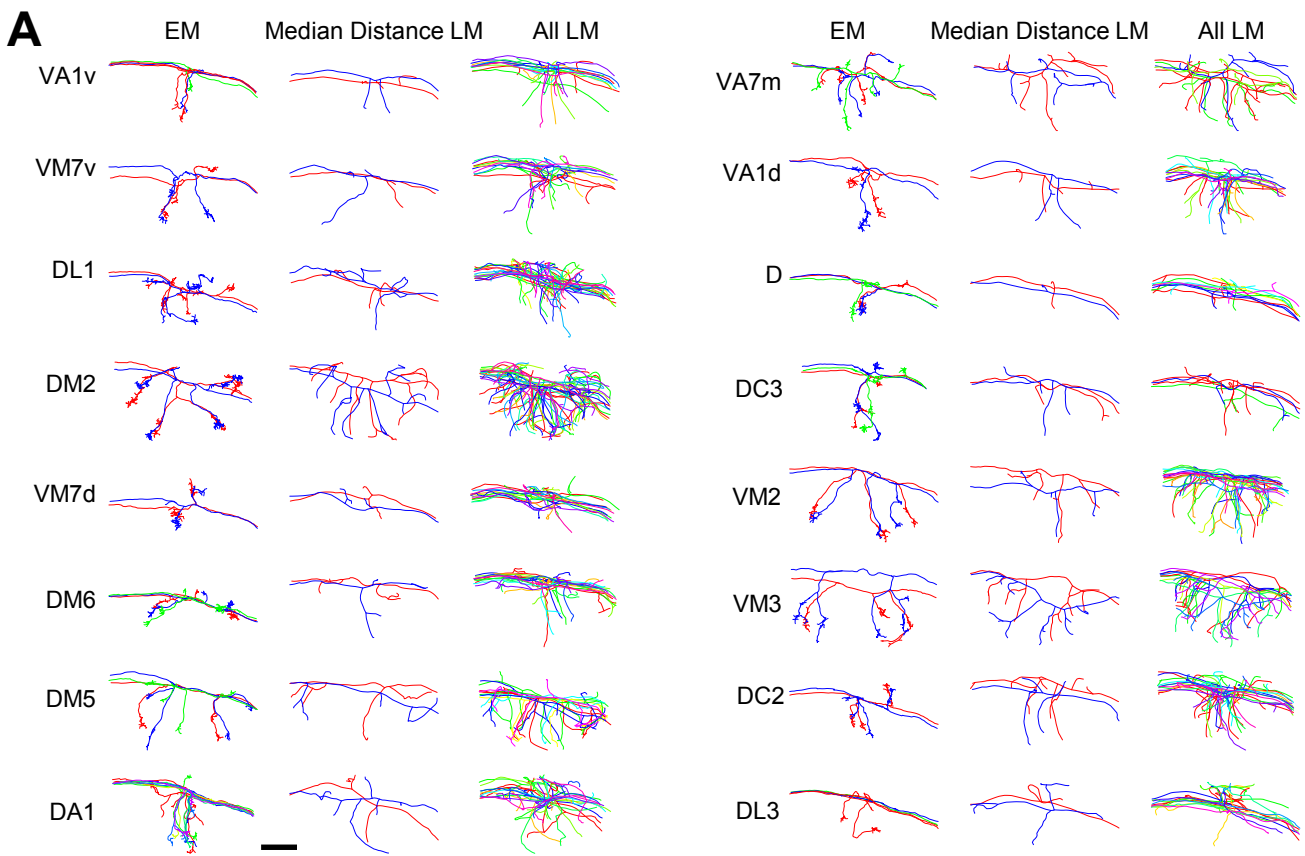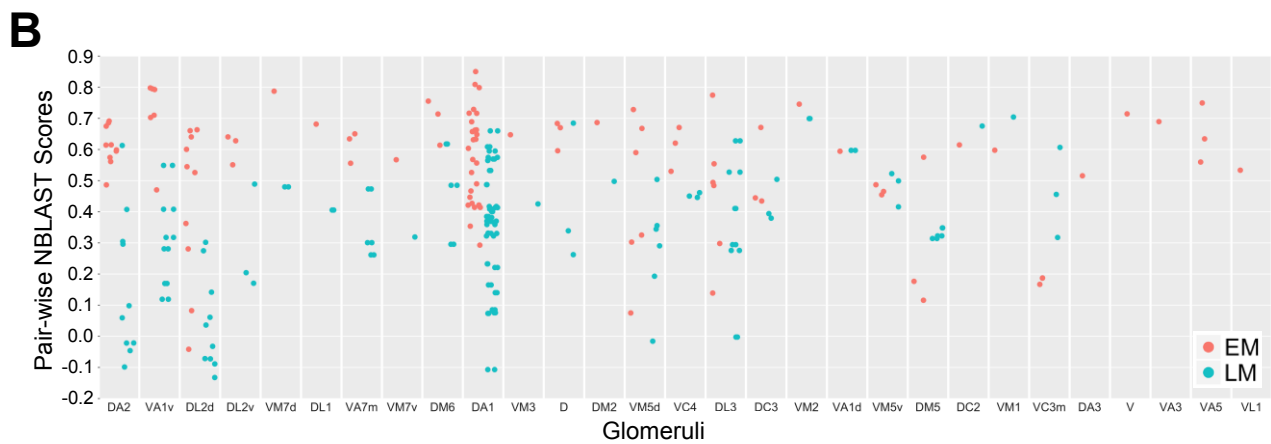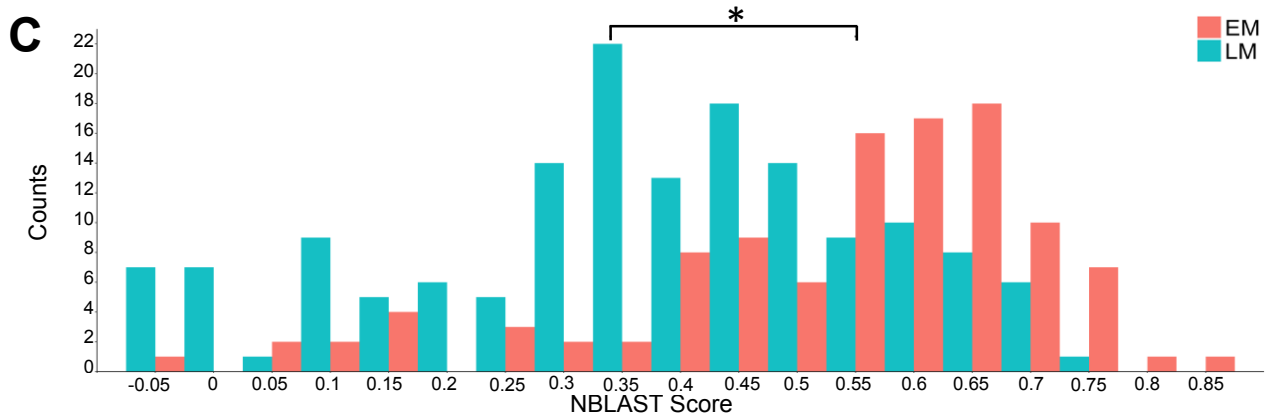

**Figure S7. EM versus LM PNs. Related to Figure 5.**

|         |              |                       | NBLAST results |            |              |            |       |            |       |            |       |            |       |
|---------|--------------|-----------------------|----------------|------------|--------------|------------|-------|------------|-------|------------|-------|------------|-------|
| PN      | skeleton ids | expert identification | match          | 1st hit    |              | 2nd hit    |       | 3rd hit    |       | 4th hit    |       | 5th hit    |       |
|         |              |                       |                | glomerulus | score        | glomerulus | score | glomerulus | score | glomerulus | score | glomerulus | score |
| 27295   | DA1          | 1st                   | DA1            | 0.697      | DA1          | 0.688      | DA1   | 0.685      | DA1   | 0.683      | DA1   | 0.672      |       |
| 57311   | DA1          | 1st                   | DA1            | 0.701      | DA1          | 0.686      | DA1   | 0.682      | DA1   | 0.680      | DA1   | 0.657      |       |
| 57323   | DA1          | 1st                   | DA1            | 0.653      | DA1          | 0.635      | DA1   | 0.634      | DA1   | 0.633      | DA1   | 0.626      |       |
| 57353   | DA1          | 1st                   | DA1            | 0.656      | DA1          | 0.645      | DA1   | 0.625      | DA1   | 0.618      | DA1   | 0.617      |       |
| 57381   | DA1          | 1st                   | DA1            | 0.717      | DA1          | 0.697      | DA1   | 0.693      | DA1   | 0.678      | DA1   | 0.673      |       |
| 61221   | DA1          | 1st                   | DA1            | 0.685      | DA1          | 0.684      | DA1   | 0.681      | DA1   | 0.681      | DA1   | 0.678      |       |
| 755022  | DA1          | 1st                   | DA1            | 0.635      | DA1          | 0.618      | DA1   | 0.613      | DA1   | 0.605      | DA1   | 0.604      |       |
| 2863104 | DA1          | 1st                   | DA1            | 0.657      | DA1          | 0.640      | DA1   | 0.634      | DA1   | 0.633      | DA1   | 0.624      |       |
| 38885   | DA2          | 1st                   | DA2            | 0.639      | DA2          | 0.621      | DA2   | 0.619      | DA2   | 0.589      | DA2   | 0.563      |       |
| 53631   | DA2          | 1st                   | DA2            | 0.583      | DA2          | 0.555      | DA2   | 0.529      | DA2   | 0.522      | DA2   | 0.513      |       |
| 57418   | DA2          | 1st                   | DA2            | 0.635      | DA2          | 0.623      | DA2   | 0.622      | DA2   | 0.592      | DA2   | 0.578      |       |
| 57422   | DA2          | 1st                   | DA2            | 0.615      | DA2          | 0.604      | DA2   | 0.602      | DA2   | 0.581      | DA2   | 0.549      |       |
| 1785034 | DA2          | 1st                   | DA2            | 0.602      | DA2          | 0.601      | DA2   | 0.596      | DA2   | 0.564      | DA2   | 0.526      |       |
| 65762   | DC2          | 1st                   | DC2            | 0.551      | DA2          | 0.537      | DA2   | 0.514      | DA2   | 0.508      | DA2   | 0.498      |       |
| 32399   | DC3          | 1st                   | DC3            | 0.577      | VA1v         | 0.480      | VA1d  | 0.459      | VA1d  | 0.449      | VA1v  | 0.446      |       |
| 57241   | DC3          | 1st                   | DC3            | 0.513      | VA1d         | 0.428      | VA1d  | 0.400      | DA1   | 0.393      | VA1v  | 0.376      |       |
| 57414   | DC3          | 1st                   | DC3            | 0.581      | VA1d         | 0.457      | VA1d  | 0.442      | VA1d  | 0.428      | VA1v  | 0.425      |       |
| 27303   | DL1          | 1st                   | DL1            | 0.644      | DL1          | 0.639      | DL1   | 0.622      | DL1   | 0.612      | DL1   | 0.596      |       |
| 1775706 | DL1          | 1st                   | DL1            | 0.680      | DL1          | 0.655      | DL1   | 0.645      | DL1   | 0.641      | DL1   | 0.636      |       |
| 30791   | DL2d         | 1st                   | DL2d           | 0.670      | DL2d         | 0.652      | DL2d  | 0.646      | DL2d  | 0.644      | DL2d  | 0.641      |       |
| 57333   | DL2d         | 1st                   | DL2d           | 0.672      | DL2d         | 0.670      | DL2d  | 0.670      | DL2d  | 0.666      | DL2d  | 0.664      |       |
| 57337   | DL2d         | 1st                   | DL2d           | 0.712      | DL2d         | 0.695      | DL2d  | 0.693      | DL2d  | 0.693      | DL2d  | 0.690      |       |
| 57341   | DL2d         | 1st                   | DL2d           | 0.704      | DL2d         | 0.701      | DL2d  | 0.700      | DL2d  | 0.682      | DL2d  | 0.682      |       |
| 67637   | DL2d         | 1st                   | DL2d           | 0.625      | DL2d         | 0.609      | DL2v  | 0.605      | DL2d  | 0.601      | DL2d  | 0.593      |       |
| 22422   | DL2v         | 1st                   | DL2v           | 0.699      | DL2v         | 0.696      | DL2v  | 0.691      | DL2v  | 0.686      | DL2v  | 0.681      |       |
| 56623   | DL2v         | 1st                   | DL2v           | 0.664      | DL2v         | 0.661      | DL2v  | 0.651      | DL2v  | 0.650      | DL2v  | 0.646      |       |
| 61773   | DL2v         | 1st                   | DL2v           | 0.690      | DL2v         | 0.683      | DL2v  | 0.682      | DL2v  | 0.676      | DL2v  | 0.673      |       |
| 33903   | DL3          | 1st                   | DL3            | 0.673      | DA1          | 0.644      | DA1   | 0.614      | DA1   | 0.608      | DA1   | 0.602      |       |
| 77661   | DL3          | 1st                   | DL3            | 0.637      | DA1          | 0.601      | DA1   | 0.595      | DA1   | 0.581      | DL3   | 0.580      |       |
| 581536  | DL3          | 1st                   | DL3            | 0.638      | DA1          | 0.609      | DA1   | 0.605      | DA1   | 0.605      | DA1   | 0.589      |       |
| 23829   | DL4          | 1st                   | DL4            | 0.594      | DA1          | 0.574      | DL1   | 0.458      | DL1   | 0.434      | VM7   | 0.275      |       |
| 30891   | DM1          | 1st                   | DM1            | 0.671      | putative VA4 | 0.491      | DM5   | 0.463      | DM5   | 0.433      | VC2   | 0.428      |       |
| 22594   | DM5          | 1st                   | DM5            | 0.604      | DM5          | 0.599      | VM5d  | 0.533      | VM5d  | 0.510      | VM5d  | 0.509      |       |
| 27611   | DM5          | 1st                   | DM5            | 0.587      | VM5d         | 0.580      | VM5d  | 0.561      | VM5d  | 0.561      | VM5d  | 0.557      |       |
| 57307   | DM6          | 1st                   | DM6            | 0.601      | DM6          | 0.596      | DM6   | 0.594      | DM6   | 0.579      | DM6   | 0.575      |       |
| 60799   | DM6          | 1st                   | DM6            | 0.633      | DM6          | 0.627      | DM6   | 0.600      | DM6   | 0.593      | DM6   | 0.589      |       |
| 68697   | DM6          | 1st                   | DM6            | 0.581      | DM6          | 0.577      | DM6   | 0.567      | DM6   | 0.565      | DM6   | 0.565      |       |
| 27048   | DP1l         | 1st                   | DP1l           | 0.665      | DP1l         | 0.530      | DL2v  | 0.463      | DL2v  | 0.460      | DL2v  | 0.456      |       |
| 27884   | V            | 1st                   | V              | 0.540      | V            | 0.382      | V     | 0.367      | VP1   | 0.331      | V     | 0.225      |       |
| 192547  | V            | 1st                   | V              | 0.511      | VP1          | 0.215      | V     | 0.109      | V     | 0.108      | DP1l  | 0.030      |       |
| 36390   | VA1d         | 1st                   | VA1d           | 0.631      | DC3          | 0.545      | VA1v  | 0.540      | VA1v  | 0.517      | VA1v  | 0.515      |       |
| 42421   | VA1d         | 1st                   | VA1d           | 0.561      | DC3          | 0.532      | VA1v  | 0.499      | VA1v  | 0.497      | VA1v  | 0.491      |       |
| 51080   | VA1v         | 1st                   | VA1v           | 0.627      | VA1v         | 0.620      | VA1v  | 0.610      | VA1v  | 0.605      | VA1v  | 0.602      |       |
| 52106   | VA1v         | 1st                   | VA1v           | 0.604      | VA1v         | 0.599      | VA1v  | 0.592      | VA1v  | 0.579      | VA1v  | 0.577      |       |
| 55125   | VA1v         | 1st                   | VA1v           | 0.614      | VA1v         | 0.585      | VA1v  | 0.585      | VA1v  | 0.577      | VA1v  | 0.574      |       |
| 57246   | VA1v         | 1st                   | VA1v           | 0.654      | VA1v         | 0.641      | VA1v  | 0.635      | VA1v  | 0.634      | VA1v  | 0.622      |       |
| 23569   | VA4          | 1st                   | putative VA4   | 0.580      | VC2          | 0.528      | DM5   | 0.495      | DM5   | 0.439      | DL2v  | 0.398      |       |
| 32214   | VA7m         | 1st                   | VA7m           | 0.600      | VA7m         | 0.568      | DA2   | 0.457      | VM1   | 0.445      | DL2d  | 0.420      |       |
| 36108   | VA7m         | 1st                   | VA7m           | 0.634      | VA7m         | 0.629      | DL2d  | 0.470      | DL2v  | 0.463      | DL2d  | 0.460      |       |
| 186573  | VA7m         | 1st                   | VA7m           | 0.587      | VA7m         | 0.581      | VC2   | 0.490      | DA2   | 0.458      | VM1   | 0.447      |       |
| 45242   | VC2          | 1st                   | VC2            | 0.640      | VC2          | 0.586      | DM5   | 0.483      | DM5   | 0.470      | VM1   | 0.460      |       |
| 22277   | VC3m         | 1st                   | VC3m           | 0.605      | VC3m         | 0.589      | VC3m  | 0.584      | VC3m  | 0.584      | VC3m  | 0.576      |       |
| 22744   | VC3m         | 1st                   | VC3m           | 0.591      | VC3m         | 0.584      | VC3m  | 0.584      | VC3m  | 0.581      | VC3m  | 0.576      |       |
| 400943  | VC3m         | 1st                   | VC3m           | 0.598      | VC3m         | 0.596      | VC3m  | 0.590      | VC3m  | 0.580      | VC3m  | 0.579      |       |
| 37935   | VC4          | 1st                   | VC4            | 0.593      | VC4          | 0.592      | VC4   | 0.563      | VC4   | 0.562      | VM7   | 0.500      |       |
| 42927   | VC4          | 1st                   | VC4            | 0.600      | VC4          | 0.554      | VC4   | 0.532      | VC4   | 0.512      | VM7   | 0.503      |       |
| 55085   | VC4          | 1st                   | VC4            | 0.607      | VC4          | 0.607      | VC4   | 0.568      | VC4   | 0.557      | VM5v  | 0.516      |       |
| 24726   | VM1          | 1st                   | VM1            | 0.690      | VM1          | 0.680      | VM1   | 0.679      | VM1   | 0.674      | VM1   | 0.673      |       |
| 775731  | VM1          | 1st                   | VM1            | 0.642      | VM1          | 0.631      | VM1   | 0.626      | VM1   | 0.624      | VM1   | 0.583      |       |
| 51886   | VM2          | 1st                   | VM2            | 0.639      | VM2          | 0.620      | VM2   | 0.616      | VM2   | 0.603      | VM2   | 0.574      |       |
| 54072   | VM2          | 1st                   | VM2            | 0.679      | VM2          | 0.658      | VM2   | 0.657      | VM2   | 0.642      | VM2   | 0.597      |       |
| 23597   | VM4          | 1st                   | VM4            | 0.465      | VM4          | 0.432      | VC3m  | 0.414      | VC3m  | 0.385      | VC3m  | 0.377      |       |
| 39139   | VM5d         | 1st                   | VM5d           | 0.598      | VM5d         | 0.597      | VM5v  | 0.589      | VM5d  | 0.583      | VM5d  | 0.570      |       |
| 23512   | VM5v         | 1st                   | VM5v           | 0.618      | VM5v         | 0.618      | VM5v  | 0.578      | VM5v  | 0.567      | VM5v  | 0.565      |       |
| 30434   | VM5v         | 1st                   | VM5v           | 0.596      | VM5v         | 0.587      | VM5v  | 0.581      | VM5v  | 0.562      | VM5v  | 0.552      |       |
| 53671   | VM5v         | 1st                   | VM5v           | 0.596      | VM5v         | 0.580      | VM5v  | 0.559      | VM5v  | 0.538      | VM5v  | 0.530      |       |
| 39254   | VM6          | 1st                   | VM6+VP2        | 0.596      | VC3m         | 0.499      | VC3m  | 0.481      | VC3m  | 0.478      | VC3m  | 0.478      |       |
| 40306   | VM7d         | 1st                   | VM7            | 0.654      | VM7          | 0.653      | VM7   | 0.633      | VM7   | 0.632      | VM7   | 0.622      |       |
| 40790   | VM7d         | 1st                   | VM7            | 0.605      | VM7          | 0.599      | VM7   | 0.595      | VM7   | 0.595      | VM7   | 0.584      |       |
| 24251   | VM7v         | 1st                   | VM7            | 0.537      | VM7          | 0.524      | VM7   | 0.517      | VM7   | 0.503      | VM7   | 0.503      |       |
| 43539   | VM7v         | 1st                   | VM7            | 0.541      | VM7          | 0.522      | VM7   | 0.507      | VM5d  | 0.502      | VM7   | 0.499      |       |
| 24622   | D            | 2nd                   | DL1            | 0.532      | D            | 0.523      | DL1   | 0.513      | DL1   | 0.509      | DL1   | 0.489      |       |
| 40637   | D            | 2nd                   | DL1            | 0.574      | D            | 0.562      | DL1   | 0.537      | DL1   | 0.521      | DL1   | 0.517      |       |
| 40749   | DA4m         | 2nd                   | DC2            | 0.531      | DA4          | 0.512      | DL4   | 0.479      | DA4   | 0.476      | DA2   | 0.470      |       |
| 57402   | DC2          | 2nd                   | DL1            | 0.515      | DC2          | 0.506      | VM7   | 0.482      | DA2   | 0.476      | DL1   | 0.475      |       |
| 27246   | VM3          | 2nd                   | putative VA4   | 0.539      | VM3          | 0.529      | VM2   | 0.520      | VM2   | 0.516      | VC4   | 0.495      |       |
| 35447   | VM5d         | 2nd                   | VM5v           | 0.638      | VM5d         | 0.633      | VM5v  | 0.632      | VM5v  | 0.624      | VM5v  | 0.601      |       |
| 49865   | VM5d         | 2nd                   | VM5v           | 0.603      | VM5d         | 0.568      | VM5d  | 0.546      | VM5d  | 0.542      | VM5d  | 0.540      |       |
| 57459   | DL3          | 4th                   | DA1            | 0.595      | DA1          | 0.592      | DA1   | 0.581      | DL3   | 0.580      | DA1   | 0.576      |       |
| 62434   | VM5d         | 4th                   | VM5v           | 0.635      | VM5v         | 0.625      | VM5v  | 0.613      | VM5d  | 0.603      | VM5v  | 0.599      |       |
| 35246   | D            | 5th                   | DL1            | 0.561      | DL1          | 0.559      | DL1   | 0.549      | DL1   | 0.532      | D     | 0.531      |       |
| 57385   | DM5          | N                     | DA2            | 0.530      | DM6          | 0.521      | DL2d  | 0.517      | DL2d  | 0.516      | DL2d  | 0.514      |       |
| 58686   | DP1m         | N                     | putative VA4   | 0.471      | DM5          | 0.459      | VC2   | 0.440      | DL2v  | 0.410      | DL2d  | 0.405      |       |
| 41308   | VM3          | N                     | VM2            | 0.478      | VC4          | 0.456      | VM2   | 0.446      | VC4   | 0.438      | VC4   | 0.413      |       |

**Table S1. NBLAST Scores for PNs. Related to Figure 4.**
